# Supplementary material for: How is the COVID-19 lockdown impacting the mental health of parents of school-age children in the UK? A cross-sectional online survey
Source: PubMed Central journal article supplement — BMJ Open. 2021 May 11;11(5):e043397. doi: 10.1136/bmjopen-2020-043397 (PMC8117442; doi:10.1136/bmjopen-2020-043397), 2021-05-11

# BMJ Open

BMJ Open is committed to open peer review. As part of this commitment we make the peer review history of every article we publish publicly available.

When an article is published we post the peer reviewers' comments and the authors' responses online. We also post the versions of the paper that were used during peer review. These are the versions that the peer review comments apply to.

The versions of the paper that follow are the versions that were submitted during the peer review process. They are not the versions of record or the final published versions. They should not be cited or distributed as the published version of this manuscript.

BMJ Open is an open access journal and the full, final, typeset and author-corrected version of record of the manuscript is available on our site with no access controls, subscription charges or pay-per-view fees (<http://bmjopen.bmj.com>).

If you have any questions on BMJ Open's open peer review process please email [info.bmjopen@bmj.com](mailto:info.bmjopen@bmj.com)

# BMJ Open

## How is the COVID-19 lockdown impacting the mental health of parents and their school children? A cross-sectional online survey

|                               |                                                                                                                                                                                                                                                                                                                                                                                                                                                                                                                                                                                                                                                                                                                                                                                                                                                                                                                                                                                                             |
|-------------------------------|-------------------------------------------------------------------------------------------------------------------------------------------------------------------------------------------------------------------------------------------------------------------------------------------------------------------------------------------------------------------------------------------------------------------------------------------------------------------------------------------------------------------------------------------------------------------------------------------------------------------------------------------------------------------------------------------------------------------------------------------------------------------------------------------------------------------------------------------------------------------------------------------------------------------------------------------------------------------------------------------------------------|
| Journal:                      | <i>BMJ Open</i>                                                                                                                                                                                                                                                                                                                                                                                                                                                                                                                                                                                                                                                                                                                                                                                                                                                                                                                                                                                             |
| Manuscript ID                 | bmjopen-2020-043397                                                                                                                                                                                                                                                                                                                                                                                                                                                                                                                                                                                                                                                                                                                                                                                                                                                                                                                                                                                         |
| Article Type:                 | Original research                                                                                                                                                                                                                                                                                                                                                                                                                                                                                                                                                                                                                                                                                                                                                                                                                                                                                                                                                                                           |
| Date Submitted by the Author: | 01-Aug-2020                                                                                                                                                                                                                                                                                                                                                                                                                                                                                                                                                                                                                                                                                                                                                                                                                                                                                                                                                                                                 |
| Complete List of Authors:     | <p>El-Osta, Austen; Imperial College London Faculty of Medicine, Self-Care Academic Research Unit (SCARU), Department of Primary Care &amp; Public Health</p> <p>Alaa, Aos; Imperial College London Faculty of Medicine, Self-Care Academic Research Unit (SCARU), Department of Primary Care &amp; Public Health</p> <p>Webber, Iman; Imperial College London Faculty of Medicine, Self-Care Academic Research Unit (SCARU), Department of Primary Care &amp; Public Health</p> <p>Riboli Sasco, Eva; Imperial College London Faculty of Medicine, Self-Care Academic Research Unit (SCARU), Department of Primary Care &amp; Public Health</p> <p>Bagkeris, Emmanouil; University College London, Department of Applied Health Research</p> <p>Millar, Helen L; The Carseview Centre, Psychiatry</p> <p>Vidal-Hall, Charlotte; Brackenhury Primary School, Chair of Governing Board</p> <p>Majeed, Azeem; Imperial College London Faculty of Medicine, Department of Primary Care &amp; Public Health</p> |
| Keywords:                     | PUBLIC HEALTH, MENTAL HEALTH, PREVENTIVE MEDICINE                                                                                                                                                                                                                                                                                                                                                                                                                                                                                                                                                                                                                                                                                                                                                                                                                                                                                                                                                           |
|                               |                                                                                                                                                                                                                                                                                                                                                                                                                                                                                                                                                                                                                                                                                                                                                                                                                                                                                                                                                                                                             |

SCHOLARONE™  
Manuscripts

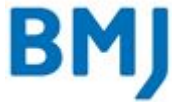

I, the Submitting Author has the right to grant and does grant on behalf of all authors of the Work (as defined in the below author licence), an exclusive licence and/or a non-exclusive licence for contributions from authors who are: i) UK Crown employees; ii) where BMJ has agreed a CC-BY licence shall apply, and/or iii) in accordance with the terms applicable for US Federal Government officers or employees acting as part of their official duties; on a worldwide, perpetual, irrevocable, royalty-free basis to BMJ Publishing Group Ltd ("BMJ") its licensees and where the relevant Journal is co-owned by BMJ to the co-owners of the Journal, to publish the Work in this journal and any other BMJ products and to exploit all rights, as set out in our [licence](#).

The Submitting Author accepts and understands that any supply made under these terms is made by BMJ to the Submitting Author unless you are acting as an employee on behalf of your employer or a postgraduate student of an affiliated institution which is paying any applicable article publishing charge ("APC") for Open Access articles. Where the Submitting Author wishes to make the Work available on an Open Access basis (and intends to pay the relevant APC), the terms of reuse of such Open Access shall be governed by a Creative Commons licence – details of these licences and which [Creative Commons](#) licence will apply to this Work are set out in our licence referred to above.

Other than as permitted in any relevant BMJ Author's Self Archiving Policies, I confirm this Work has not been accepted for publication elsewhere, is not being considered for publication elsewhere and does not duplicate material already published. I confirm all authors consent to publication of this Work and authorise the granting of this licence.

# How is the COVID-19 lockdown impacting the mental health of parents and their school children?

## A cross-sectional online survey

---

1. Austen El-Osta<sup>1\*</sup> [a.el-osta@imperial.ac.uk](mailto:a.el-osta@imperial.ac.uk)
2. Aos Alaa<sup>1</sup> [aos.alaa18@imperial.ac.uk](mailto:aos.alaa18@imperial.ac.uk)
3. Iman Webber<sup>1</sup> [i.webber@imperial.ac.uk](mailto:i.webber@imperial.ac.uk)
4. Emmanouil Bagkeris<sup>2</sup> [e.bagkeris@imperial.ac.uk](mailto:e.bagkeris@imperial.ac.uk)
5. Eva Riboli-Sasco<sup>1</sup> [e.riboli-sasco@imperial.ac.uk](mailto:e.riboli-sasco@imperial.ac.uk)
6. Hellen L Millar<sup>3</sup> [hlmillar1@gmail.com](mailto:hlmillar1@gmail.com)
7. Charlotte Vidal Hall<sup>4</sup> [chall163.205@lgflmail.org](mailto:chall163.205@lgflmail.org)
8. Azeem Majeed<sup>1</sup> [a.majeed@imperial.ac.uk](mailto:a.majeed@imperial.ac.uk)

- 1- Imperial College London, Department of Primary Care & Public Health
- 2- Imperial College London, National Health & Lung Institute
- 3- NHS Fife Community Service, Mental Health Service, Fife Health & Social Care Partnership.
- 4- Chair of Governing Board, Brackenbury Primary School, London UK

\*Corresponding author

**Word count: 3866**

# ABSTRACT

## Objective

Investigate the impact of the COVID-19 lockdown on feelings of loneliness and social isolation in parents of school-age children

## Design

Cross sectional online survey of parents of primary and secondary school-age children

## Setting

1214 Community-dwelling adults in the United Kingdom

## Participants

1214 parents of school-age children in the United Kingdom

## Methods

An online survey explored the impact of lockdown on the mental health of parents with school-age children, and in particular about feelings of social isolation and loneliness. Associations between the UCLA three-item Loneliness Scale (UCLATILS), the Direct Measure of Loneliness (DMOL) and the characteristics of the study participants were assessed using ordinal logistic regression models

## Main outcome measures

Self-reported measures of social isolation and loneliness using UCLATILS and DMOL.

## Results

Half of respondents felt they lacked companionship, 45% had feelings of being left out, 58% felt isolated and 46% felt lonely. The factors that were associated with higher levels of loneliness on UCLATILS were female gender, parenting a child with special needs, lack of a dedicated space for distance learning, disruption of sleep patterns and low levels of physical activity during the lockdown. Factors associated with a higher DMOL were female gender, single-parenting, parenting a child with special needs, unemployment, low physical activity, lack of a dedicated study-space and disruption of sleep patterns during the lockdown.

## Conclusions

The COVID-19 lockdown has increased feelings of social isolation and loneliness among parents with school-age children. Two modifiable health seeking lifestyle behaviours such as increased levels of physical activity and the maintenance of good sleep hygiene practices during the lockdown were identified as key factors in reducing feelings of social isolation and loneliness.

## Article summary

- We surveyed 1214 parents of school-age children to assess the impact of the lockdown measures on feelings of social isolation and loneliness
- We collected data on mental health, physical activity levels and other lifestyle factors in the first 100 days of the lockdown
- School closures have a significant impact on the mental health of parents of school-age children, and this should be taken into account when considering future COVID-19 risk mitigation strategies
- The adoption of health-seeking self-care behaviours such as increased levels of physical activity and good sleep hygiene practices can help reduce the risk of social isolation and loneliness

## INTRODUCTION

The COVID-19 pandemic has affected educational systems, leading to the near-total closures of educational institutions in the United Kingdom. As of 6 May 2020, schools were suspended in 177 countries affecting over 1.3 billion learners worldwide (1), and in many cases closures have resulted in the universal cancellation of examinations (2, 3). UNICEF estimated that almost four months of education will be lost as a result of the lockdown (4). School closures have far-reaching economic and societal consequences, including the disruption of routine everyday behaviours and routines. In the UK, over two million workers have already lost their jobs (5, 6), and although the long-term impact of the pandemic on education is not yet clear, the pre-existing attainment gap between the poorest and richest children (7) may widen significantly as a result of COVID-19 (4, 8, 9). Children and young people make up 21% of the population of England (10), and by the time they return to school after the summer break, some would have been out of education for nearly six months.

Lockdown measures significantly limit social interactions, opportunities for social intercourse or in being able to receive the social support needed to promote mental wellbeing (11). The temporary closure of schools also means that children miss out on vital social skills and physical activity which may cause further detriment to their mental health and the quality of their social interaction with their parents and other members of the household (12). Loss of routine social contact could also lead to different patterns of social response (13, 14) whilst increasing feelings of social isolation and loneliness (15-17). There is growing concern over the impact of school closures on the mental health and wellbeing of parents and school-aged children (18-20), and in particular about feelings of social isolation and loneliness.

The impact of loneliness on public mental health is well characterised (21), and include depression (22, 23), anxiety (24) and suicide (25, 26), and is linked with cardiovascular conditions (27, 28) and cancer (29). Prolonged periods of loneliness and social isolation are also associated with future mental health problems up to 9 years later (30), and the strongest association was with depression (31) and stress (32). Although acknowledged to be different concepts, social isolation and loneliness may affect

1  
2  
3 people of all ages (33), and the terms are used interchangeably such that they are  
4 often considered together (34). There have been numerous attempts in the literature  
5 to identify predictors of loneliness (30, 35, 36), but this subjective phenomenon  
6 remains difficult to measure, and its prevalence is thought to be significantly under-  
7 represented. Known predictors of loneliness include living alone, living in rented  
8 accommodation, household size, education level, self-reported health measures and,  
9 paradoxically, living in population-dense areas.  
10  
11

12 The measurement of social isolation and loneliness is challenging as it is largely  
13 subjective and qualitative in nature (37). The UK Office for National Statistics (ONS)  
14 recommends the use of the UCLA three-item loneliness scale (UCLATILS) as an  
15 indirect measure for loneliness, and a fourth Direct Measure of Loneliness (DMOL)  
16 question (38). ONS also recommends attempting to harmonise these indicators across  
17 the UK Government Statistical Service. The recency of the recommendations may be  
18 a reason behind the lack of standardised and retrospective data on loneliness in the  
19 UK. Successful interventions aimed at tackling social isolation and loneliness include  
20 leveraging existing community assets such as parks and green spaces, befriending  
21 schemes, skill development strategies, psychological therapies (39-42). The UK  
22 government published its first Loneliness Strategy in October 2018, signalling the first  
23 important step in tackling this rising problem of society. Reports have already  
24 documented loneliness in the elderly as a result of the COVID-19 lockdown (43), but  
25 research regarding this aspect of mental health on parents with school-age children  
26 during the pandemic is scarce in the first 100 days after the lockdown was initiated  
27 resulting in school closures in the UK.  
28  
29  
30  
31

### 32 **Study objectives**

33 The aim of this study was to explore how the lockdown is affecting the mental health  
34 of parents of school-age children, and in particular to assess the impact of an extended  
35 period of school closures on feelings of social isolation & loneliness.  
36  
37  
38  
39  
40

## 41 **METHODS**

### 42 **Study design**

43 We conducted a cross-sectional online survey of adult parents and legal guardians of  
44 children who were attending primary or secondary education in the UK.  
45  
46  
47  
48

49 The link to the electronic survey was published and available on the Imperial College  
50 Qualtrics platform for a period of 9 weeks (May to July 2020). The survey was open  
51 and could be accessed by anyone with a link. Using snowball sampling, potentially  
52 eligible participants received an invitation email from the head teacher of schools  
53 where study information was disseminated including the Participant Information Sheet  
54 (PIS) and link to the survey. The researchers' personal and professional networks  
55 were also mobilized to respond and further disseminate the eSurvey among eligible  
56 participants. The PIS included information regarding the study's aims, the protection  
57 of participants' personal data, their right to withdraw from the study at any time, which  
58 data were stored, where and for how long, who the investigator was, the purpose of  
59  
60



1  
2  
3 the study and survey length. Participants were informed that this was a voluntary  
4 survey without any monetary incentives but offering the possibility to access the  
5 results and underlying the potential collective benefits of taking parts in terms of  
6 knowledge and policies. The data collected were stored on the Imperial secure  
7 database and only the team researchers could access the eSurvey results.  
8  
9

10 The survey comprised a total of 51 questions displayed on one page and was  
11 accessible using a personal computer or smartphone. Questions regarding  
12 demographic characteristics of the users included information on gender, age,  
13 educational level, number of people living in the household, first part of postal code  
14 and employment status. Participants could review their answers before submitting  
15 them. All data collected through the survey were anonymised and not personally  
16 identifiable. The online survey technical functionality was tested before being  
17 published. The first question asked participants to confirm their consent to participate  
18 in the eSurvey.  
19  
20

21 Experiences and perceptions related to the impact of the lockdown on the mental  
22 health of parents and other members of their household were evaluated through a  
23 number of questions concerning self-reported or perceived levels of depression,  
24 stress, feeling of loneliness, social isolation and boredom. Loneliness was measured  
25 using the validated UCLATILS with responses never/hardly ever, some of the time,  
26 and often (44). The questions were scored 1 to 3, then totalled to a score ranging from  
27 3 to 9. Loneliness was subsequently categorized as follows: no loneliness (score =1),  
28 moderate loneliness (score = 2 to 3), and severe loneliness (score = 4 to 5). An  
29 additional one item DMOL (45) was also used as recommended by the Office of  
30 National Statistics. Questions concerning users' experiences were scored on a 1-5  
31 Likert scale. Respondents were able to refrain from providing an answer by selecting  
32 'no opinion'.  
33  
34  
35

36 The survey included eleven additional questions to explore perceptions of feelings of  
37 social isolation pre- and post-school closures. Perceptions on distance learning were  
38 explored through questions related to whether or not their child received regular  
39 homework, live or online lessons, had access to technology (personal computer, tablet  
40 or phone), time spent studying, and whether the child had access to a dedicated space  
41 to study. Perceptions on the impact of school closures on the lifestyle behaviours of  
42 respondents and their school children were recorded by asking questions relating to  
43 pre- and post-lockdown self-reported measures of physical activity levels of both  
44 parents and children, the children's sleeping patterns and how children spent their  
45 leisure time. The quality of the survey was assessed by completing the Checklist for  
46 Reporting Results of Internet E-Surveys (CHERRIES).  
47  
48  
49

### 50 **Statistical analysis**

51 Analyses were conducted separately for the UCLATILS and DMOL. Parent and child  
52 characteristics were described using frequencies and percentages. Pearson's chi-  
53 square test was used to identify differences of statistical significance. Associations  
54 between the UCLATILS, DMOL and the characteristics of the study participants were  
55 assessed using ordinal logistic regression models. The factors that were significant in  
56 the univariable models ( $p$ -value  $<0.05$ ) were considered in the multivariable analyses.  
57 All analyses were performed using Stata 15 statistical software (StataCorp).  
58  
59  
60



## Ethics

The study was given ethical approval by Imperial College Research Ethics Committee (ICREC # 20IC5978). Participants consented to take part in the survey.

## Public involvement

The study protocol and online survey were developed in collaboration with the Governing Board of Brackenbury Primary School in the London Borough of Hammersmith & Fulham.

# RESULTS

## Demographic profile of respondents

The electronic survey captured responses from 1214 respondents from across England (**Table 1**). More than half (53.1%) were aged 40-49 years, whereas 2.5%, 29.2%, 14.4% and 0.9% were in the second, third, fifth or sixth decade of age respectively. Eighty seven percent of respondents were female, and 80.5% identified as white ethnic background. Sixty six percent were educated to university degree, 70.9% were in full or part-time employment and 87.1% had a partner that was employed. A fifth (20.8%) had one child, 53.5% had two children, and 25.8% had three or more children. Only 3.8% were a single parent family, whereas 75.3% of respondents were living in households consisting of 4 or more people.

## School and children characteristics

Nine out of ten (89.5%) children attended a public school. More than half (54.1%) of respondents had a child receiving primary education, 22.3% in secondary school and 23.6% had more than one child, one attending either primary or secondary schools. Eleven percent of respondents had a child with special needs. Sixty eight percent indicated that their child had access to a dedicated space where they can learn or study at home. The vast majority (97.9%) of children had access to a personal computer, laptop, tablet or smartphone, of whom 54.0% had their own devices and 43.9% did not have their own but could access devices belonging to other members of their household and two percent did not have access to any technology. Distance learning was accessed by 90.7% of children, but only 47.7% of respondents reported their child was receiving live or online lessons. Only 9.5% of children received private tuition. The time spent on distance learning ranged between 0-8 hours per day, with 36.8% studying for less than 2 hours, 30.7% studying between 2-4 hours and 32.5% studying more than 4 hours.

## Mental health and physical wellbeing

The vast majority of respondents felt their children were experiencing medium to high levels of boredom (93.8%) and medium or high levels of stress (82.3%) during the lockdown compared to before school closures. Almost half of the participants (48.1%) have reported a shift in the sleeping pattern of children by staying up until much later in the evening during the lockdown. Only 37.2% of respondents reported that the sleeping patterns of their children did not change during the lockdown. Forty-five percent reported that their levels of physical activity were low during the lockdown. Seventy percent of respondents felt that school closures also reduced the physical activity of their child.

Table 1: Respondent characteristics

|                               | Total |         | UCL three-item loneliness scale (UCLATILS) |        |          |        |      |        | ONS Direct measure of loneliness (DMOL) |     |          |     |        |     |         |         |
|-------------------------------|-------|---------|--------------------------------------------|--------|----------|--------|------|--------|-----------------------------------------|-----|----------|-----|--------|-----|---------|---------|
|                               | N     | (%)     | No                                         |        | Moderate |        | High |        | No                                      |     | Moderate |     | High   |     | p value |         |
|                               |       |         | n                                          | (%)    | n        | (%)    | n    | (%)    | p-value                                 | n   | (%)      | n   | (%)    | n   | (%)     | p value |
| <b>PARENT CHARACTERISTICS</b> |       |         |                                            |        |          |        |      |        |                                         |     |          |     |        |     |         |         |
| <b>Age group</b>              |       |         |                                            |        |          |        |      |        | 0.05                                    |     |          |     |        |     |         | 0.004   |
| 20-29                         | 30    | (100.0) | 6                                          | (20.0) | 10       | (33.3) | 14   | (46.7) |                                         | 9   | (30.0)   | 13  | (43.3) | 8   | (26.7)  |         |
| 30-39                         | 354   | (100.0) | 122                                        | (34.5) | 85       | (24.0) | 147  | (41.5) |                                         | 166 | (47.6)   | 127 | (36.4) | 56  | (16.0)  |         |
| 40-49                         | 643   | (100.0) | 202                                        | (31.4) | 184      | (28.6) | 257  | (40.0) |                                         | 346 | (54.3)   | 219 | (34.4) | 72  | (11.3)  |         |
| 50-59                         | 174   | (100.0) | 73                                         | (42.0) | 52       | (29.9) | 49   | (28.2) |                                         | 109 | (63.0)   | 46  | (26.6) | 18  | (10.4)  |         |
| 60+                           | 11    | (100.0) | 4                                          | (36.4) | 3        | (27.3) | 4    | (36.4) |                                         | 7   | (63.6)   | 3   | (27.3) | 1   | (9.1)   |         |
| <b>Gender</b>                 |       |         |                                            |        |          |        |      |        | <0.001                                  |     |          |     |        |     |         | 0.002   |
| Male                          | 149   | (100.0) | 75                                         | (50.3) | 31       | (20.8) | 43   | (28.9) |                                         | 99  | (66.4)   | 39  | (26.2) | 11  | (7.4)   |         |
| Female                        | 1062  | (100.0) | 331                                        | (31.2) | 303      | (28.5) | 428  | (40.3) |                                         | 537 | (51.1)   | 369 | (35.1) | 144 | (13.7)  |         |
| <b>Ethnicity</b>              |       |         |                                            |        |          |        |      |        | 0.23                                    |     |          |     |        |     |         | 0.42    |
| White                         | 962   | (100.0) | 322                                        | (33.5) | 269      | (28.0) | 371  | (38.6) |                                         | 512 | (53.7)   | 322 | (33.8) | 120 | (12.6)  |         |
| Black                         | 25    | (100.0) | 7                                          | (28.0) | 5        | (20.0) | 13   | (52.0) |                                         | 11  | (45.8)   | 8   | (33.3) | 5   | (20.8)  |         |
| Asian                         | 101   | (100.0) | 27                                         | (26.7) | 25       | (24.8) | 49   | (48.5) |                                         | 43  | (43.4)   | 39  | (39.4) | 17  | (17.2)  |         |
| Mixed/other                   | 107   | (100.0) | 42                                         | (39.3) | 30       | (28.0) | 35   | (32.7) |                                         | 60  | (56.6)   | 34  | (32.1) | 12  | (11.3)  |         |
| <b>Level of education</b>     |       |         |                                            |        |          |        |      |        | 0.15                                    |     |          |     |        |     |         | 0.004   |
| Secondary school              | 274   | (100.0) | 92                                         | (33.6) | 67       | (24.5) | 115  | (42.0) |                                         | 125 | (46.3)   | 95  | (35.2) | 50  | (18.5)  |         |
| Diploma                       | 127   | (100.0) | 40                                         | (31.5) | 34       | (26.8) | 53   | (41.7) |                                         | 64  | (51.2)   | 42  | (33.6) | 19  | (15.2)  |         |
| Bachelor's Degree             | 446   | (100.0) | 151                                        | (33.9) | 126      | (28.3) | 169  | (37.9) |                                         | 234 | (53.1)   | 155 | (35.1) | 52  | (11.8)  |         |
| Master's Degree               | 264   | (100.0) | 81                                         | (30.7) | 77       | (29.2) | 106  | (40.2) |                                         | 152 | (57.8)   | 90  | (34.2) | 21  | (8.0)   |         |
| Doctorate                     | 88    | (100.0) | 39                                         | (44.3) | 28       | (31.8) | 21   | (23.9) |                                         | 58  | (65.9)   | 21  | (23.9) | 9   | (10.2)  |         |
| <b>Employment</b>             |       |         |                                            |        |          |        |      |        | 0.15                                    |     |          |     |        |     |         | 0.001   |
| Employed full-time            | 479   | (100.0) | 168                                        | (35.1) | 143      | (29.9) | 168  | (35.1) |                                         | 264 | (55.5)   | 158 | (33.2) | 54  | (11.3)  |         |
| Employed part-time            | 372   | (100.0) | 121                                        | (32.5) | 98       | (26.3) | 153  | (41.1) |                                         | 189 | (51.2)   | 133 | (36.0) | 47  | (12.7)  |         |

1  
2  
3  
4  
5  
6  
7  
8  
9  
10  
11  
12  
13  
14  
15  
16  
17  
18  
19  
20  
21  
22  
23  
24  
25  
26  
27  
28  
29  
30  
31  
32  
33  
34  
35  
36  
37  
38  
39  
40  
41  
42  
43  
44  
45  
46

|                                                     | Total |         | UCL three-item loneliness scale (UCLATILS) |        |          |        |      |        | ONS Direct measure of loneliness (DMOL) |     |          |     |        |     |         |         |
|-----------------------------------------------------|-------|---------|--------------------------------------------|--------|----------|--------|------|--------|-----------------------------------------|-----|----------|-----|--------|-----|---------|---------|
|                                                     | N     | (%)     | No                                         |        | Moderate |        | High |        | No                                      |     | Moderate |     | High   |     | p value |         |
|                                                     |       |         | n                                          | (%)    | n        | (%)    | n    | (%)    | p-value                                 | n   | (%)      | n   | (%)    | n   | (%)     | p value |
| Self-employed                                       | 182   | (100.0) | 63                                         | (34.6) | 52       | (28.6) | 67   | (36.8) |                                         | 107 | (59.4)   | 59  | (32.8) | 14  | (7.8)   |         |
| Not working**                                       | 170   | (100.0) | 53                                         | (31.2) | 37       | (21.8) | 80   | (47.1) |                                         | 74  | (44.3)   | 55  | (32.9) | 38  | (22.8)  |         |
| <b>Number of people in the household</b>            |       |         |                                            |        |          |        |      |        | 0.37                                    |     |          |     |        |     |         | 0.024   |
| 2                                                   | 45    | 100.0)  | 11                                         | (24.4) | 11       | (24.4) | 23   | (51.1) |                                         | 13  | (28.9)   | 21  | (46.7) | 11  | (24.4)  |         |
| 3                                                   | 249   | 100.0)  | 85                                         | (34.1) | 66       | (26.5) | 98   | (39.4) |                                         | 136 | (54.6)   | 76  | (30.5) | 37  | (14.9)  |         |
| 4                                                   | 597   | 100.0)  | 201                                        | (33.7) | 173      | (29.0) | 223  | (37.4) |                                         | 323 | (54.9)   | 202 | (34.4) | 63  | (10.7)  |         |
| 5                                                   | 208   | (100.0) | 76                                         | (36.5) | 58       | (27.9) | 74   | (35.6) |                                         | 114 | (55.3)   | 63  | (30.6) | 29  | (14.1)  |         |
| 6+                                                  | 94    | (100.0) | 29                                         | (30.9) | 20       | (21.3) | 45   | (47.9) |                                         | 46  | (49.5)   | 35  | (37.6) | 12  | (12.9)  |         |
| <b>Physical activity levels during the lockdown</b> |       |         |                                            |        |          |        |      |        | 0.001                                   |     |          |     |        |     |         | <0.001  |
| Low                                                 | 176   | (100.0) | 48                                         | (27.3) | 50       | (28.4) | 78   | (44.3) |                                         | 85  | (48.9)   | 51  | (29.3) | 38  | (21.8)  |         |
| Medium                                              | 575   | (100.0) | 178                                        | (31.0) | 153      | (26.6) | 244  | (42.4) |                                         | 279 | (48.9)   | 220 | (38.5) | 72  | (12.6)  |         |
| High                                                | 436   | (100.0) | 175                                        | (40.1) | 123      | (28.2) | 138  | (31.7) |                                         | 262 | (60.9)   | 126 | (29.3) | 42  | (9.8)   |         |
| <b>CHILD CHARACTERISTICS</b>                        |       |         |                                            |        |          |        |      |        |                                         |     |          |     |        |     |         |         |
| <b>Level of schooling</b>                           |       |         |                                            |        |          |        |      |        | 0.04                                    |     |          |     |        |     |         | 0.001   |
| Primary                                             | 656   | (100.0) | 209                                        | (31.9) | 171      | (26.1) | 276  | (42.1) |                                         | 319 | (49.1)   | 226 | (34.8) | 105 | (16.2)  |         |
| Secondary                                           | 270   | (100.0) | 106                                        | (39.3) | 78       | (28.9) | 86   | (31.9) |                                         | 165 | (61.1)   | 81  | (30.0) | 24  | (8.9)   |         |
| Both (I have ≥1 child)                              | 285   | (100.0) | 91                                         | (31.9) | 85       | (29.8) | 109  | (38.3) |                                         | 152 | (54.5)   | 101 | (36.2) | 26  | (9.3)   |         |
| <b>Special needs</b>                                |       |         |                                            |        |          |        |      |        | 0.009                                   |     |          |     |        |     |         | 0.008   |
| Yes                                                 | 133   | (100.0) | 35                                         | (26.3) | 30       | (22.6) | 68   | (51.1) |                                         | 53  | (40.8)   | 53  | (40.8) | 24  | (18.5)  |         |
| No                                                  | 1077  | (100.0) | 371                                        | (34.4) | 304      | (28.2) | 402  | (37.3) |                                         | 583 | (54.6)   | 354 | (33.1) | 131 | (12.3)  |         |
| <b>Dedicated space to study</b>                     |       |         |                                            |        |          |        |      |        | 0.001                                   |     |          |     |        |     |         | <0.001  |
| Yes                                                 | 831   | (100.0) | 304                                        | (36.6) | 230      | (27.7) | 297  | (35.7) |                                         | 476 | (57.8)   | 256 | (31.1) | 91  | (11.1)  |         |
| No                                                  | 379   | (100.0) | 102                                        | (26.9) | 104      | (27.4) | 173  | (45.6) |                                         | 160 | (42.7)   | 151 | (40.3) | 64  | (17.1)  |         |
| <b>Access to technology</b>                         |       |         |                                            |        |          |        |      |        | 0.02                                    |     |          |     |        |     |         | <0.001  |
| Yes                                                 | 653   | (100.0) | 240                                        | (36.8) | 173      | (26.5) | 240  | (36.8) |                                         | 380 | (58.8)   | 195 | (30.2) | 71  | (11.0)  |         |
| Yes, but not their own                              | 532   | (100.0) | 162                                        | (30.5) | 157      | (29.5) | 213  | (40.0) |                                         | 253 | (47.8)   | 202 | (38.2) | 74  | (14.0)  |         |

|                                                | Total |         | UCL three-item loneliness scale (UCLATILS) |          |      |         |     |        | ONS Direct measure of loneliness (DMOL) |          |      |         |     |        |     |        |         |
|------------------------------------------------|-------|---------|--------------------------------------------|----------|------|---------|-----|--------|-----------------------------------------|----------|------|---------|-----|--------|-----|--------|---------|
|                                                | N     | (%)     | No                                         | Moderate | High | p-value |     |        | No                                      | Moderate | High | p value |     |        |     |        |         |
|                                                | n     | (%)     | n                                          | (%)      | n    | (%)     | n   | (%)    | n                                       | (%)      | n    | (%)     | n   | (%)    | n   | (%)    | p value |
| No                                             | 25    | (100.0) | 5                                          | (20.0)   | 4    | (16.0)  | 16  | (64.0) |                                         |          | 4    | (17.4)  | 10  | (43.5) | 9   | (39.1) |         |
| <b>In receipt of distance learning</b>         |       |         |                                            |          |      |         |     |        | 0.46                                    |          |      |         |     |        |     |        | 0.03    |
| Yes                                            | 1101  | (100.0) | 375                                        | (34.1)   | 301  | (27.3)  | 425 | (38.6) |                                         |          | 589  | (54.0)  | 368 | (33.8) | 133 | (12.2) |         |
| No                                             | 110   | (100.0) | 31                                         | (28.2)   | 33   | (30.0)  | 46  | (41.8) |                                         |          | 47   | (43.1)  | 40  | (36.7) | 22  | (20.2) |         |
| <b>In receipt of live/online lessons</b>       |       |         |                                            |          |      |         |     |        | 0.24                                    |          |      |         |     |        |     |        | 0.001   |
| Yes                                            | 409   | (100.0) | 142                                        | (34.7)   | 116  | (28.4)  | 151 | (36.9) |                                         |          | 234  | (57.6)  | 133 | (32.8) | 39  | (9.6)  |         |
| No                                             | 449   | (100.0) | 139                                        | (31.0)   | 119  | (26.5)  | 191 | (42.5) |                                         |          | 210  | (47.1)  | 160 | (35.9) | 76  | (17.0) |         |
| <b>Sleeping pattern</b>                        |       |         |                                            |          |      |         |     |        | <0.001                                  |          |      |         |     |        |     |        | <0.001  |
| No major change in sleeping pattern            | 449   | (100.0) | 187                                        | (41.6)   | 128  | (28.5)  | 134 | (29.8) |                                         |          | 285  | (63.9)  | 123 | (27.6) | 38  | (8.5)  |         |
| Slight change                                  | 168   | (100.0) | 61                                         | (36.3)   | 44   | (26.2)  | 63  | (37.5) |                                         |          | 90   | (54.9)  | 53  | (32.3) | 21  | (12.8) |         |
| child now sleeps much later in the evening     | 580   | (100.0) | 153                                        | (26.4)   | 158  | (27.2)  | 269 | (46.4) |                                         |          | 253  | (44.0)  | 229 | (39.8) | 93  | (16.2) |         |
| child now sleeping much earlier in the evening | 9     | (100.0) | 4                                          | (44.4)   | 3    | (33.3)  | 2   | (22.2) |                                         |          | 7    | (77.8)  | 1   | (11.1) | 1   | (11.1) |         |

**Table 2: Univariable and multivariable association of three-item UCLATILS with characteristics of study participants**

|                                                                  | Univariable       |         | Multivariable        |         |
|------------------------------------------------------------------|-------------------|---------|----------------------|---------|
|                                                                  | OR (95% CI)       | p-value | Adjusted OR (95% CI) | p-value |
| <b>Age</b>                                                       |                   |         |                      |         |
| 50+                                                              | <i>Ref.</i>       |         | <i>Ref.</i>          |         |
| 20-39                                                            | 1.56 (1.12, 2.16) | 0.008   | 1.26 (0.85, 1.86)    | 0.24    |
| 40-49                                                            | 1.59 (1.18, 2.16) | 0.003   | 1.38 (0.98, 1.94)    | 0.07    |
| <b>Gender of the parent</b>                                      |                   |         |                      |         |
| Male                                                             | <i>Ref.</i>       |         | <i>Ref.</i>          |         |
| Female                                                           | 2.03 (1.46, 2.82) | <0.001  | 1.82 (1.29, 2.57)    | 0.001   |
| <b>Level of schooling</b>                                        |                   |         |                      |         |
| Secondary                                                        | <i>Ref.</i>       |         | <i>Ref.</i>          |         |
| Primary                                                          | 1.41 (1.08, 1.83) | 0.011   | 1.28 (0.94, 1.75)    | 0.12    |
| Both (more than 1 child)                                         | 1.32 (0.97, 1.79) | 0.079   | 1.13 (0.81, 1.59)    | 0.47    |
| <b>Access to technology</b>                                      |                   |         |                      |         |
| Yes                                                              | <i>Ref.</i>       |         | <i>Ref.</i>          |         |
| No                                                               | 2.51 (1.11, 5.71) | 0.03    | 1.62 (0.70, 3.74)    | 0.26    |
| <b>Special needs</b>                                             |                   |         |                      |         |
| No                                                               | <i>Ref.</i>       |         | <i>Ref.</i>          |         |
| Yes                                                              | 1.66 (1.18, 2.35) | 0.004   | 1.44 (1.01, 2.06)    | 0.04    |
| <b>Dedicated space</b>                                           |                   |         |                      |         |
| Yes                                                              | <i>Ref.</i>       |         | <i>Ref.</i>          |         |
| No                                                               | 1.52 (1.21, 1.91) | <0.001  | 1.33 (1.04, 1.69)    | 0.02    |
| <b>Change in the sleeping patterns</b>                           |                   |         |                      |         |
| No                                                               | <i>Ref.</i>       |         | <i>Ref.</i>          |         |
| Slight disruption                                                | 1.31 (0.94, 1.82) | 0.110   | 1.27 (0.91, 1.78)    | 0.16    |
| Marked disruption*                                               | 1.95 (1.55, 2.46) | <0.001  | 1.90 (1.50, 2.41)    | <0.001  |
| <b>Physical activity level of the parent during the lockdown</b> |                   |         |                      |         |
| High                                                             | <i>Ref.</i>       |         | <i>Ref.</i>          |         |
| Low                                                              | 1.77 (1.28, 2.45) | 0.001   | 1.53 (1.09, 2.14)    | 0.01    |
| Medium                                                           | 1.56 (1.24, 1.97) | <0.001  | 1.45 (1.14, 1.84)    | 0.002   |

\*Applies to children who's sleeping pattern changed and slept much earlier or later than prior to lockdown

**Table 3: Univariable and multivariable association of ONS Direct Measure of Loneliness (DMOL) score with characteristics of study participants**

|                                                                  | Univariable       |         | Multivariable        |         |
|------------------------------------------------------------------|-------------------|---------|----------------------|---------|
|                                                                  | OR (95% CI)       | p-value | Adjusted OR (95% CI) | p-value |
| <b>Age</b>                                                       |                   |         |                      |         |
| 50+                                                              | <i>Ref.</i>       |         | <i>Ref.</i>          |         |
| 20-39                                                            | 1.98 (1.38, 2.85) | <0.001  | 1.47 (0.95, 2.27)    | 0.09    |
| 40-49                                                            | 1.37 (0.97, 1.92) | 0.07    | 1.22 (0.83, 1.79)    | 0.32    |
| <b>Gender of the parent</b>                                      |                   |         |                      |         |
| Male                                                             | <i>Ref.</i>       |         | <i>Ref.</i>          |         |
| Female                                                           | 1.88 (1.31, 2.71) | 0.001   | 1.52 (1.03, 2.24)    | 0.03    |
| <b>Education</b>                                                 |                   |         |                      |         |
| University degree or higher                                      | <i>Ref.</i>       |         | <i>Ref.</i>          |         |
| Secondary school or high school diploma                          | 1.50 (1.18, 1.90) | 0.001   | 1.27 (0.98, 1.64)    | 0.07    |
| <b>Employment status</b>                                         |                   |         |                      |         |
| Employed                                                         | <i>Ref.</i>       |         | <i>Ref.</i>          |         |
| Unemployed*                                                      | 1.83 (1.32, 2.53) | <0.001  | 1.70 (1.21, 2.38)    | 0.002   |
| <b>Physical activity level of the parent during the lockdown</b> |                   |         |                      |         |
| High                                                             | <i>Ref.</i>       |         | <i>Ref.</i>          |         |
| Medium                                                           | 1.62 (1.26, 2.08) | <0.001  | 1.53 (1.18, 1.99)    | 0.002   |
| Low                                                              | 1.86 (1.30, 2.64) | 0.001   | 1.53 (1.06, 2.21)    |         |
| <b>Number of people at home</b>                                  |                   |         |                      |         |
| 3 or above                                                       | <i>Ref.</i>       |         | <i>Ref.</i>          |         |
| Single parent family                                             | 2.49 (1.42, 4.39) | 0.002   | 2.12 (1.17, 3.82)    | 0.01    |
| <b>Level of schooling</b>                                        |                   |         |                      |         |
| Secondary                                                        | <i>Ref.</i>       |         | <i>Ref.</i>          |         |
| Primary                                                          | 1.65 (1.23, 2.20) | 0.001   | 1.35 (0.96, 1.92)    | 0.09    |
| Both (more than 1 child)                                         | 1.31 (0.94, 1.84) | 0.11    | 1.05 (0.72, 1.53)    | 0.79    |
| <b>Access to technology</b>                                      |                   |         |                      |         |
| Yes                                                              | <i>Ref.</i>       |         | <i>Ref.</i>          |         |
| No                                                               | 4.09 (1.86, 8.99) | <0.001  | 1.60 (0.69, 3.71)    | 0.28    |
| <b>Special needs</b>                                             |                   |         |                      |         |
| No                                                               | <i>Ref.</i>       |         | <i>Ref.</i>          |         |
| Yes                                                              | 1.82 (1.28, 2.58) | 0.001   | 1.45 (1.01, 2.08)    | 0.05    |
| <b>Dedicated space</b>                                           |                   |         |                      |         |

1  
2  
3  
4  
5  
6  
7  
8  
9  
10  
11  
12  
13  
14  
15  
16  
17  
18  
19  
20  
21  
22  
23  
24  
25  
26  
27  
28  
29  
30  
31  
32  
33  
34  
35  
36  
37  
38  
39  
40  
41  
42  
43  
44  
45  
46

|                                        | Univariable       |         | Multivariable        |         |
|----------------------------------------|-------------------|---------|----------------------|---------|
|                                        | OR (95% CI)       | p-value | Adjusted OR (95% CI) | p-value |
| Yes                                    | <i>Ref.</i>       |         | <i>Ref.</i>          |         |
| No                                     | 1.83 (1.44, 2.33) | <0.001  | 1.59 (1.23, 2.06)    | <0.001  |
| <b>Distance learning</b>               |                   |         |                      |         |
| Yes                                    | <i>Ref.</i>       |         | <i>Ref.</i>          |         |
| No                                     | 1.56 (1.06, 2.29) | 0.03    | 1.34 (0.88, 2.03)    | 0.17    |
| <b>Change in the sleeping patterns</b> |                   |         |                      |         |
| No                                     | <i>Ref.</i>       |         | <i>Ref.</i>          |         |
| Slightly                               | 1.45 (1.01, 2.09) | 0.04    | 1.41 (0.97, 2.05)    | 0.07    |
| A lot                                  | 2.18 (1.70, 2.81) | <0.001  | 2.15 (1.65, 2.79)    | <0.001  |

\* Unemployed/ Unable to work/Student/Retired

For peer review only



### Loneliness and social isolation

Forty six percent (46.3%) of respondents felt they lacked companionship, whereas 52.4% reported having feelings of being left out, 58% reported feeling isolated from others on UCLATILS (**Table 1; Supplementary table**). More than half (58.9%) reported they felt lonely often or most of the time on DMOL. Parents reported that 58.5%, 71.0% and 72.2% of children felt they lacked companionship, had feelings of being left out, or feeling isolated from others in that same order, whereas 46.9% showed signs of feeling lonely often or most of the time on DMOL. Overall, 43.3% of respondents confirmed that their children were experiencing feelings of social isolation. More than two thirds (68.8%) felt that video calls where their child could see their teacher could help reduce feelings of social isolation, whereas 60.6% felt this could reduce feelings of loneliness. Overall, 43.9% and 33.0% felt that the lockdown and school closures respectively had caused them and their child to feel significantly more depressed (**Supplementary table**).

### UCLA three-item Loneliness Score (UCLATILS)

The multivariable ordinal logistic model suggested that the main factors associated with significantly higher odds of having a higher level of UCLATILS were female gender of the respondent, having a child with special needs, lack of a dedicated space, a change in the child's sleeping patterns, and having low or medium physical activity during the lockdown (**table 2**). The univariably significant association of age, level of schooling (primary or secondary education) and access to technology with UCLATI Loneliness Score were attenuated and became non-significant in the multivariable model. Compared to male respondents, females were 82% more likely to have a higher UCLATILS. Parents of children who had special needs, and those who lacked a dedicated space to study had 44.0% and 33% higher odds of scoring higher UCLATILS respectively. Parents with low or medium level of physical activity had 53% and 45% higher odds of reporting a higher UCLATILS respectively compared to high during lockdown (**table 2**). Households who reported a disruption in the sleeping pattern of their children were 90% more likely to report a higher UCLATILS.

### Direct Measure of Loneliness (DMOL)

The factors associated with higher DMOL were gender, employment status, physical activity level, household size, having children with special needs, having dedicated space to study and changes in sleeping patters during the lockdown (**table 3**). In particular, female respondents and those who were unemployed were 52.0% and 70.0% more likely to report a higher DMOL in that same order. Respondents with low or medium levels of physical activity during the lockdown had a 53% increase in the odds of scoring a higher DMOL. Having a child with special needs increased the odds of scoring higher on DMOL by 45%, whereas single parent families and those whose children changed their sleeping patterns had 2.1-fold higher odds of scoring a higher DMOL.

Households who reported a lack of a dedicated space to study scored 59.0% higher on DMOL (**table 3**). The associations of other parent and child characteristics that were significantly associated in the univariate analysis with a DMOL (age, education, level of schooling, access to technology and distance learning) were attenuated and became nonsignificant in the multivariable model.

### **General perceptions about lockdown, school closures, cancellation of exams and student preparedness for next academic year**

Two thirds of respondents (66.2%) said they were indifferent that end of year exams being cancelled, compared to 10.8% who were happy, and 23.0% who said they were unhappy with this decision. Parents felt that only 30% of children preferred exams to be online as opposed to face-to-face. Fifty six percent of parents of secondary education children felt that their child would not be adequately prepared to sit exams if they were to be taken online. Twenty one percent reported they would be unhappy or very unhappy to send their child back to school should the lockdown be lifted and schools re-open again for this academic year.

## **DISCUSSION**

We collected data in the first 100 days of lockdown and found that female gender, lower levels of physical activity, parenting a child with special needs, lower levels of education, unemployment, reduced access to technology, not having a dedicated space where the child can study and the disruption of the child's sleep patterns during the lockdown are the main factors associated with a significantly higher odds of reporting feelings of loneliness.

Our findings are consistent with the results of other studies that tracked the mental health of adults, children and young people aged 4-16 years throughout the COVID-19 crisis and showed that parents reported an increase in their child's emotional, behavioural, and restless/attentional difficulties (46). Access to personal computers, smartphones and tablets vary widely in relation to income levels. Private schools are significantly more likely to provide children with adequate equipment including laptops and tablets (7), and this has direct implications on the efficiency of online schooling since distance learning relies on digital access and electronic devices that the child can use at home.

Another major issue with online provision and distance learning is access to a dedicated space for the child at home that will facilitate such learning. Our data highlighted a significant association between the lack of a dedicated space and increased measures of loneliness in adult respondents. Lack of a dedicated space may be proxy-measure of lower income in families who are more likely to live in an overcrowded environment (47). The pre-existing attainment gap which loomed between the poorest and richest children showed that children from disadvantaged backgrounds were twice as likely to leave formal education without GCSEs in English and Maths compared to their peers who live in less deprived areas or whose parents have a higher total household income (48). The Education Endowment Foundation has suggested school closures could reverse the progress made in the last decade to narrow this gap (49) as children from better-off families will have received as much as 35% more home learning than children from the poorest households (50). This raises particular concern for parents of low-income who are less likely to be in a position to assist their children's studies with financial resources and this can play a significant role in a child's learning (51). School closures have thus shed a light on the subsequent social and economic consequences of the pandemic including a rise in inequalities and those factors that could be considered as a proxy-measure of income deprivation

1  
2  
3 such as digital exclusion, reduced access to tablets and smartphones or a dedicated  
4 study where the child can study.  
5

6  
7 A recent study established that disruption of good sleep hygiene practices could lead  
8 to a behavioural profile of social withdrawal and loneliness (52), whereas loneliness is  
9 a known independent risk factor for physical inactivity (53). This was reflected in the  
10 findings of our study which showed that both factors (lower physical activity level and  
11 disruption of sleep patterns) were independently associated with higher loneliness.  
12 Pertinently, both of these personal risk factors are modifiable and could be addressed  
13 through self-care practices. For example, exercise has long been associated with  
14 better sleep, and evidence is accumulating on the efficacy of exercise as a  
15 nonpharmacologic treatment option for disturbed sleep (54). Physical activity  
16 interventions in particular have also been shown to reduce loneliness and improve  
17 psychological well-being (55, 56).  
18  
19

20  
21 Social interaction and physical activity are known key factors in promoting a healthy  
22 state of physical and mental wellbeing (57-59), but the unprecedented social  
23 distancing and lockdown measures have forced the vast majority of the UK population  
24 to stay at home for long periods of time. This significantly limited routine opportunities  
25 for social interactions with peers, while the closure of schools, gyms and some parks  
26 and play areas significantly reduced physical activity levels. Many households were  
27 also faced with various issues including concern over job security coupled to the  
28 increased need to supervise their children's learning and homework when one or both  
29 parents are required to work from home. Our study showed that these factors are likely  
30 to adversely affect the mental health of individuals, and in particular by increasing the  
31 prevalence of social isolation and loneliness in households.  
32  
33

34  
35 Preventative measures that can be implemented to reduce the risk of social isolation  
36 and loneliness and bridge social distancing during lockdown include the use of digital  
37 technologies. China and Singapore established various initiatives to minimise  
38 outbreak-related stress and poor mental wellbeing including the deployment of  
39 enhanced social support networks and psychological services that could be delivered  
40 online (60-62). Teachers can also play an important role in alleviating a child's sense  
41 of isolation at school (63), but the extent to which this could be accomplished with live  
42 or online lessons whilst distance learning remains unclear.  
43  
44

45  
46 Our UK study illustrated an increasing trend in the prevalence of social isolation and  
47 loneliness in parents of school-age children during the lockdown as was evidenced  
48 among emergency workers and other the quarantined populations (64, 65). The  
49 prevailing assumption that a resurgence of COVID-19 cases is expected in the winter  
50 months shortly after schools re-open in September is leading to the development of a  
51 range of preparedness and risk mitigation strategies (66). Recent modelling studies  
52 predict that school closures alone would only prevent 2–4% of deaths, which is  
53 significantly less than other social distancing interventions (67). Thus, whereas school  
54 closures present an apparently logical method of reducing virus transmission as  
55 evidenced from previous influenza outbreaks, it poses a dilemma for policy makers  
56 seeking measures to protect populations (67). Recent modelling studies predict that  
57 school closures alone would only prevent 2–4% of deaths, which is significantly less  
58 than other social distancing interventions (67). Thus, whereas school closures present  
59 an apparently logical method of reducing virus transmission as evidenced from  
60

1  
2  
3 previous influenza outbreaks, they pose a dilemma for policy makers seeking  
4 measures to protect populations (67). This is reflected in the findings of our study  
5 which showed that one in five respondents may be unwilling to send their child back  
6 to school should schools re-open again for this academic year. Because school  
7 closures have a significant impact on public mental health and wellbeing (20) and may  
8 exacerbate inequalities (49, 50), this should be taken into account when considering  
9 future risk mitigation strategies to minimise virus transmission in the community and  
10 educational settings.  
11  
12

13  
14 The principle limitation of our study was the lack of follow-up, and not recording  
15 information about household income and demographic and lifestyle factors such as  
16 nutrition, smoking, use of alcohol and recreational drugs which may have enabled a  
17 fuller exploration of the factors that could influence the primary outcome measures  
18 examined. Further, the demographic profile of study participants largely consisted of  
19 white and employed female parents implying that this cross-section may not be  
20 representative of the wider UK parent population. We also acknowledged that since  
21 this was an online survey, we may have excluded parents with little or no digital  
22 access. These limitations restrict the generalisability of our findings to the wider  
23 population of parents across the UK. In spite of these limitations, our findings echo the  
24 results of other studies which show that lockdown measures are negatively impacting  
25 the public mental health of individuals across all age groups and may be significantly  
26 increasing the prevalence of social isolation and loneliness (18-20).  
27  
28

29  
30 The extraordinary measures introduced to control the COVID-19 pandemic has  
31 exacerbated pre-existing inequalities within society (68). When coupled to social  
32 distancing measures, the school closures have negatively impacted the mental health  
33 of school children and their parents and increased the prevalence of social isolation  
34 and loneliness in the community setting.  
35

### 36 **Conclusions**

37 School closures and social distancing measures implemented during the first 100 days  
38 of the COVID-19 lockdown have had an impact on the daily routines of many people  
39 and have influenced various aspects of government policy. Policy prescriptions and  
40 public health messaging should promote the adoption of good health-seeking self-care  
41 behaviours such as increased levels of physical activity and the maintenance of good  
42 sleep hygiene practices to help prevent or reduce the risk social isolation and  
43 loneliness, and this applies in particular where there is a single parent. Policy makers  
44 need to balance the impact of school closures on children and their families, and any  
45 future risk mitigation strategies should ideally not further disadvantage to the most  
46 vulnerable groups in society.  
47  
48  
49

---

51 **Acknowledgements:** The authors thank Mr David Collins (Head Teacher) and the  
52 Governing Board of Brackenbury Primary School for disseminating the survey.  
53

54  
55 **Author Contributors:** All authors provided substantial contributions to the conception  
56 (AEO, CVH, HM), design (AEO, EB, CVH), acquisition (IW, AA, ER), and interpretation  
57 (EB, IW, HM, AM) of study data and approved the final version of the paper. AEO took  
58 the lead in planning the study with support from co-authors. EB carried out the data  
59 analysis with support from AA. AEO is the guarantor.  
60

**Funding:** The research was supported by the National Institute for Health Research (NIHR) Applied Research Collaboration (ARC) North West London. The views expressed are those of the authors and not necessarily those of the NHS or the NIHR or the Department of Health and Social Care

**Competing interests:** None.

**Twitter:** Follow Austen El-Osta at @austenelosta, and Imperial College London Self-Care Academic Research Unit (SCARU) at @ImperialSCARU

---

## REFERENCES

1. UNESCO. COVID-19 Educational Disruption and Response 2020 [Available from: <https://en.unesco.org/covid19/educationresponse>].
2. Cambridge Assessment International Education. Update from Cambridge International on May/June 2020 exams 2020 [Available from: <https://www.cambridgeinternational.org/news/news-details/view/update-from-cambridge-international-on-may-june-2020-exams-20200323/>].
3. International Baccalaureate. May 2020 examinations will no longer be held. 2020.
4. Unicef. Children In Lockdown: What Coronavirus Means For UK Children. 2020.
5. The Telegraph. Two million people lose their jobs in record plunge 2020 [Available from: <https://www.telegraph.co.uk/business/2020/04/08/two-million-people-lose-jobs-record-plunge/>].
6. Ipsos MORI. Public perceptions of health and social care in light of COVID-19. The Health Foundation; 2020.
7. Carl Cullinane RM. COVID-19 and Social Mobility Impact Brief #1: School Shutdown. The Sutton Trust: The Sutton Trust; 2020.
8. Montacute R. Social Mobility and COVID-19. The Sutton Trust; 2020.
9. BBC News. Coronavirus: Further delays to children's food vouchers 2020 [Available from: <https://www.bbc.co.uk/news/education-52283067>].
10. National Institute for Health and Care Excellence. NICE impact children and young people's healthcare 2020 [Available from: <https://www.nice.org.uk/about/what-we-do/into-practice/measuring-the-use-of-nice-guidance/impact-of-our-guidance/niceimpact-children-and-young-peoples-healthcare>].
11. Goldenberg L-MMaG. Education in times of crisis: The potential implications of school closures for teachers and students. Chartered College of Teaching. 2020.
12. YoungMinds. Coronavirus: Impact on Young People with Mental Health Needs. 2020.
13. Jones WH, Freemon JE, Goswick RA. The persistence of loneliness: Self and other determinants. *Journal of Personality*. 1981;49(1):27-48.
14. Jones WH, Sansone C, Helm B. Loneliness and Interpersonal Judgments. *Personality and Social Psychology Bulletin*. 1983;9(3):437-41.
15. Qualter P, Brown SL, Munn P, Rotenberg KJ. Childhood loneliness as a predictor of adolescent depressive symptoms: an 8-year longitudinal study. *European Child & Adolescent Psychiatry*. 2010;19(6):493-501.
16. Schinka KC, Van Dulmen MH, Bossarte R, Swahn M. Association between loneliness and suicidality during middle childhood and adolescence: longitudinal effects and the role of demographic characteristics. *J Psychol*. 2012;146(1-2):105-18.
17. Vanhalst J, Klimstra TA, Luyckx K, Scholte RH, Engels RC, Goossens L. The interplay of loneliness and depressive symptoms across adolescence: exploring the role of personality traits. *J Youth Adolesc*. 2012;41(6):776-87.



18. WHO. Mental health and psychological resilience during the COVID-19 pandemic. 2020.
19. Louis Allwood AB. Covid-19: understanding inequalities in mental health during the pandemic. Centre for Mental Health,; 2020.
20. Oxford Uo. Co-Space Study: Supporting Parents, Adolescents and Children during Epidemics. 2020.
21. Rico-Uribe LA, Caballero FF, Martin-Maria N, Cabello M, Ayuso-Mateos JL, Miret M. Association of loneliness with all-cause mortality: A meta-analysis. *PLoS One*. 2018;13(1):e0190033.
22. Green BH, Copeland JR, Dewey ME, Sharma V, Saunders PA, Davidson IA, et al. Risk factors for depression in elderly people: a prospective study. *Acta Psychiatr Scand*. 1992;86(3):213-7.
23. Prince MJ, Harwood RH, Blizard RA, Thomas A, Mann AH. Social support deficits, loneliness and life events as risk factors for depression in old age. The Gospel Oak Project VI. *Psychol Med*. 1997;27(2):323-32.
24. Anderson CA, Harvey RJ. Brief report: Discriminating between problems in living: An examination of measures of depression, loneliness, shyness, and social anxiety. *Journal of Social and Clinical Psychology*. 1988;6(3-4):482-91.
25. Heinrich LM, Gullone E. The clinical significance of loneliness: A literature review. *Clinical psychology review*. 2006;26(6):695-718.
26. Bancroft J, Skrimshire A, Simkin S. The reasons people give for taking overdoses. *The British Journal of Psychiatry*. 1976;128(6):538-48.
27. Sorkin D, Rook KS, Lu JL. Loneliness, lack of emotional support, lack of companionship, and the likelihood of having a heart condition in an elderly sample. *Annals of Behavioral Medicine*. 2002;24(4):290-8.
28. Xia N, Li H. Loneliness, Social Isolation, and Cardiovascular Health. *Antioxid Redox Signal*. 2018;28(9):837-51.
29. Fox CM, Harper AP, Hyner GC, Lyle RM. Loneliness, emotional repression, marital quality, and major life events in women who develop breast cancer. *Journal of community health*. 1994;19(6):467-82.
30. Cohen-Mansfield J, Hazan H, Lerman Y, Shalom V. Correlates and predictors of loneliness in older-adults: a review of quantitative results informed by qualitative insights. *Int Psychogeriatr*. 2016;28(4):557-76.
31. Wei M, Russell DW, Zakalik RA. Adult Attachment, Social Self-Efficacy, Self-Disclosure, Loneliness, and Subsequent Depression for Freshman College Students: A Longitudinal Study. *Journal of Counseling Psychology*. 2005;52(4):602-14.
32. Loades ME, Chatburn E, Higson-Sweeney N, Reynolds S, Shafran R, Brigden A, et al. Rapid Systematic Review: The Impact of Social Isolation and Loneliness on the Mental Health of Children and Adolescents in the Context of COVID-19. *J Am Acad Child Adolesc Psychiatry*. 2020:S0890-8567(20)30337-3.
33. Perlman D, Peplau LA. Toward a social psychology of loneliness. *Personal relationships*. 1981;3:31-56.
34. Malcolm M, Frost H, Cowie J. Loneliness and social isolation causal association with health-related lifestyle risk in older adults: a systematic review and meta-analysis protocol. *Syst Rev*. 2019;8(1):48-.
35. Office for National Statistics. Loneliness - What characteristics and circumstances are associated with feeling lonely? United Kingdom: Office for National Statistics; 2018 [Available from: <https://www.ons.gov.uk/peoplepopulationandcommunity/wellbeing/articles/lonelinesswhatcharacteristicsandcircumstancesareassociatedwithfeelinglonely/2018-04-10>].
36. Iparraguirre J. Predicting the prevalence of loneliness at older ages London, United Kingdom: Age UK; 2016 [Available from: [https://www.ageuk.org.uk/globalassets/age-uk/documents/reports-and-publications/reports-and-briefings/health--wellbeing/predicting\\_the\\_prevalence\\_of\\_loneliness\\_at\\_older\\_ages.pdf](https://www.ageuk.org.uk/globalassets/age-uk/documents/reports-and-publications/reports-and-briefings/health--wellbeing/predicting_the_prevalence_of_loneliness_at_older_ages.pdf)].

- 1  
2  
3 37. Valtorta NK, Kanaan M, Gilbody S, Hanratty B. Loneliness, social isolation and social  
4 relationships: what are we measuring? A novel framework for classifying and comparing tools. *BMJ*  
5 *Open*. 2016;6(4):e010799.
- 6 38. Office for National Statistics. Recommended national indicators of loneliness United Kingdom:  
7 Office for National Statistics; 2018 [Available from:  
8 [https://www.ons.gov.uk/peoplepopulationandcommunity/wellbeing/compendium/nationalmeasure-  
9 mentofloneliness/2018/recommendednationalindicatorsof-mentofloneliness](https://www.ons.gov.uk/peoplepopulationandcommunity/wellbeing/compendium/nationalmeasure-mentofloneliness/2018/recommendednationalindicatorsof-mentofloneliness).
- 10 39. Pang HB, M ; Gnani, S; Majeed, A; El-Osta, A. Leveraging Community Assets to Tackle Social  
11 Isolation and Loneliness. *Imperial College London Primary Care Blog*. 2020.
- 12 40. O'Rourke HM, Collins L, Sidani S. Interventions to address social connectedness and loneliness  
13 for older adults: a scoping review. *BMC Geriatr*. 2018;18(1):214.
- 14 41. Gardiner C, Geldenhuys G, Gott M. Interventions to reduce social isolation and loneliness  
15 among older people: an integrative review. *Health Soc Care Community*. 2018;26(2):147-57.
- 16 42. Jopling K. Promising approaches to reducing loneliness and isolation in later life United  
17 Kingdom: Age UK; 2015 [Available from: [https://www.campaigntoendloneliness.org/wp-  
18 content/uploads/Promising-approaches-to-reducing-loneliness-and-isolation-in-later-life.pdf](https://www.campaigntoendloneliness.org/wp-content/uploads/Promising-approaches-to-reducing-loneliness-and-isolation-in-later-life.pdf).
- 19 43. Armitage R, Nellums LB. COVID-19 and the consequences of isolating the elderly. *Lancet Public*  
20 *Health*. 2020;5(5):e256-e.
- 21 44. Hughes ME, Waite LJ, Hawkey LC, Cacioppo JT. A Short Scale for Measuring Loneliness in Large  
22 Surveys: Results From Two Population-Based Studies. *Research on Aging*. 2004;26(6):655-72.
- 23 45. Office for National Statistics. Recommended national indicators of loneliness 2020 [Available  
24 from:  
25 [https://www.ons.gov.uk/peoplepopulationandcommunity/wellbeing/compendium/nationalmeasure-  
26 mentofloneliness/2018/recommendednationalindicatorsof-mentofloneliness#:~:text=Direct%20measure,ever%E2%80%9D%20or%20%22Never%22](https://www.ons.gov.uk/peoplepopulationandcommunity/wellbeing/compendium/nationalmeasure-mentofloneliness/2018/recommendednationalindicatorsof-mentofloneliness#:~:text=Direct%20measure,ever%E2%80%9D%20or%20%22Never%22).
- 27 46. Oxford Uo. Children show increase in mental health difficulties over COVID-19 lockdown.  
28 2020.
- 29 47. Rahman LJF. Lockdown livingHousing quality across the generations. *Resolution Foundation*.  
30 2020.
- 31 48. Education Endowment Foundation. *The Attainment Gap*. 2017.
- 32 49. Foundation EE. *Impact of school closures on the attainment gap*. 2020.
- 33 50. Studies Iff. *Institute for Fiscal Studies. Poverty, inequality and living standards 2013*.
- 34 51. Rebecca Montacute CC. *How parents use financial and cultural resources to boost their*  
35 *children's chances of success*. The Sutton Trust; 2018.
- 36 52. Ben Simon E, Walker MP. Sleep loss causes social withdrawal and loneliness. *Nature*  
37 *Communications*. 2018;9(1):3146.
- 38 53. Hawkey LC, Thisted RA, Cacioppo JT. Loneliness predicts reduced physical activity: cross-  
39 sectional & longitudinal analyses. *Health Psychol*. 2009;28(3):354-63.
- 40 54. Kline CE. The bidirectional relationship between exercise and sleep: Implications for exercise  
41 adherence and sleep improvement. *Am J Lifestyle Med*. 2014;8(6):375-9.
- 42 55. Shvedko AV, Thompson JL, Greig CA, Whittaker AC. Physical Activity Intervention for  
43 Loneliness (PAIL) in community-dwelling older adults: protocol for a feasibility study. *Pilot Feasibility*  
44 *Stud*. 2018;4:187.
- 45 56. Pels F, Kleinert J. Loneliness and physical activity: A systematic review. *International Review*  
46 *of Sport and Exercise Psychology*. 2016;9(1):231-60.
- 47 57. Harandi TF, Taghinasab MM, Nayeri TD. The correlation of social support with mental health:  
48 A meta-analysis. *Electron Physician*. 2017;9(9):5212-22.
- 49 58. Elbe A-M, Lyhne SN, Madsen EE, Krusturup P. Is regular physical activity a key to mental health?  
50 Commentary on "Association between physical exercise and mental health in 1.2 million individuals in  
51 the USA between 2011 and 2015: A cross-sectional study", by Chekroud et al., published in *Lancet*  
52 *Psychiatry*. *J Sport Health Sci*. 2019;8(1):6-7.
- 53  
54  
55  
56  
57  
58  
59  
60



- 1  
2  
3 59. Tough H, Siegrist J, Fekete C. Social relationships, mental health and wellbeing in physical  
4 disability: a systematic review. *BMC Public Health*. 2017;17(1):414.  
5 60. Merchant RM, Lurie N. Social media and emergency preparedness in response to novel  
6 coronavirus. *JAMA*. 2020.  
7 61. Bao Y, Sun Y, Meng S, Shi J, Lu L. 2019-nCoV epidemic: address mental health care to empower  
8 society. *Lancet*. 2020;395(10224):e37-e8.  
9 62. Ho CS, Chee CY, Ho RC. Mental Health Strategies to Combat the Psychological Impact of  
10 COVID-19 Beyond Paranoia and Panic. *Ann Acad Med Singapore*. 2020;49(3):155-60.  
11 63. Margalit M. Lonely children and adolescents: Self perceptions, social exclusion and Hope2010.  
12 64. Torales J, O'Higgins M, Castaldelli-Maia JM, Ventriglio A. The outbreak of COVID-19  
13 coronavirus and its impact on global mental health. *International Journal of Social*  
14 *Psychiatry*.0(0):0020764020915212.  
15 65. Lima CKT, Carvalho PMdM, Lima IdAAS, Nunes JVAdO, Saraiva JS, de Souza RI, et al. The  
16 emotional impact of Coronavirus 2019-nCoV (new Coronavirus disease). *Psychiatry Res*.  
17 2020;287:112915-.  
18 66. Sciences TAoM. Preparing for a challenging winter 2020/21. 2020.  
19 67. Viner RM, Russell SJ, Croker H, Packer J, Ward J, Stansfield C, et al. School closure and  
20 management practices during coronavirus outbreaks including COVID-19: a rapid systematic review.  
21 *The Lancet Child & Adolescent Health*. 2020;4(5):397-404.  
22 68. Coronini-Cronberg S, John Maile E, Majeed A. Health inequalities: the hidden cost of COVID-  
23 19 in NHS hospital trusts? *J R Soc Med*. 2020;113(5):179-84.  
24  
25  
26  
27  
28  
29  
30  
31  
32  
33  
34  
35  
36  
37  
38  
39  
40  
41  
42  
43  
44  
45  
46  
47  
48  
49  
50  
51  
52  
53  
54  
55  
56  
57  
58  
59  
60

**Supplementary table 1: Prevalence of low, moderate and high levels of loneliness (UCLATILS and DMOL) in relation to respondent characteristics**

|                                                     | Total |         | UCL three-item loneliness scale (UCLATILS) |                   |               |         |             |                   | ONS Direct measure of loneliness (DMOL) |         |  |  |        |  |
|-----------------------------------------------------|-------|---------|--------------------------------------------|-------------------|---------------|---------|-------------|-------------------|-----------------------------------------|---------|--|--|--------|--|
|                                                     | N     | (%)     | No<br>n (%)                                | Moderate<br>n (%) | High<br>n (%) | p-value | No<br>n (%) | Moderate<br>n (%) | High<br>n (%)                           | p value |  |  |        |  |
| <b>PARENT CHARACTERISTICS</b>                       |       |         |                                            |                   |               |         |             |                   |                                         |         |  |  |        |  |
| <b>How many children do you have</b>                |       |         |                                            |                   |               | 0.35    |             |                   |                                         |         |  |  | 0.24   |  |
| 1                                                   | 251   | (100.0) | 80 (31.9)                                  | 67 (26.7)         | 104 (41.4)    |         | 126 (50.2)  | 89 (35.5)         | 36 (14.3)                               |         |  |  |        |  |
| 2                                                   | 649   | (100.0) | 222 (34.2)                                 | 184 (28.4)        | 243 (37.4)    |         | 351 (54.7)  | 222 (34.6)        | 69 (10.7)                               |         |  |  |        |  |
| 3                                                   | 244   | (100.0) | 86 (35.2)                                  | 70 (28.7)         | 88 (36.1)     |         | 130 (54.2)  | 73 (30.4)         | 37 (15.4)                               |         |  |  |        |  |
| 4                                                   | 50    | (100.0) | 14 (28.0)                                  | 11 (22.0)         | 25 (50.0)     |         | 23 (46.9)   | 18 (36.7)         | 8 (16.3)                                |         |  |  |        |  |
| 5+                                                  | 18    | (100.0) | 5 (27.8)                                   | 2 (11.1)          | 11 (61.1)     |         | 7 (38.9)    | 6 (33.3)          | 5 (27.8)                                |         |  |  |        |  |
| <b>Does partner work?</b>                           |       |         |                                            |                   |               | 0.09    |             |                   |                                         |         |  |  | <0.001 |  |
| Yes                                                 | 995   | (100.0) | 348 (35.0)                                 | 284 (28.5)        | 363 (36.5)    |         | 560 (56.9)  | 318 (32.3)        | 107 (10.9)                              |         |  |  |        |  |
| No                                                  | 146   | (100.0) | 43 (29.5)                                  | 36 (24.7)         | 67 (45.9)     |         | 56 (38.9)   | 56 (38.9)         | 32 (22.2)                               |         |  |  |        |  |
| <b>Key worker</b>                                   |       |         |                                            |                   |               | 0.07    |             |                   |                                         |         |  |  | 0.03   |  |
| Yes                                                 | 213   | (100.0) | 77 (36.2)                                  | 65 (30.5)         | 71 (33.3)     |         | 121 (57.6)  | 69 (32.9)         | 20 (9.5)                                |         |  |  |        |  |
| No                                                  | 394   | (100.0) | 125 (31.7)                                 | 100 (25.4)        | 169 (42.9)    |         | 201 (51.1)  | 124 (31.6)        | 68 (17.3)                               |         |  |  |        |  |
| <b>Physical activity levels before the lockdown</b> |       |         |                                            |                   |               | 0.08    |             |                   |                                         |         |  |  | 0.02   |  |
| Low                                                 | 63    | (100.0) | 27 (42.9)                                  | 13 (20.6)         | 23 (36.5)     |         | 41 (66.1)   | 14 (22.6)         | 7 (11.3)                                |         |  |  |        |  |
| Medium                                              | 626   | (100.0) | 215 (34.4)                                 | 186 (29.7)        | 225 (35.9)    |         | 347 (56.2)  | 196 (31.7)        | 75 (12.1)                               |         |  |  |        |  |
| High                                                | 505   | (100.0) | 161 (31.9)                                 | 129 (25.5)        | 215 (42.6)    |         | 241 (48.0)  | 192 (38.3)        | 69 (13.8)                               |         |  |  |        |  |
| <b>Videocall reduces SI</b>                         |       |         |                                            |                   |               | <0.001  |             |                   |                                         |         |  |  | 0.02   |  |
| Yes                                                 | 825   | (100.0) | 245 (29.7)                                 | 238 (28.9)        | 342 (41.5)    |         | 411 (50.2)  | 296 (36.2)        | 111 (13.6)                              |         |  |  |        |  |
| No                                                  | 375   | (100.0) | 159 (42.4)                                 | 91 (24.3)         | 125 (33.3)    |         | 219 (59.0)  | 110 (29.7)        | 42 (11.3)                               |         |  |  |        |  |
| <b>Videocall reduces loneliness</b>                 |       |         |                                            |                   |               | <0.001  |             |                   |                                         |         |  |  | <0.001 |  |
| Yes                                                 | 712   | (100.0) | 194 (27.3)                                 | 204 (28.7)        | 314 (44.1)    |         | 339 (48.0)  | 266 (37.6)        | 102 (14.4)                              |         |  |  |        |  |
| No                                                  | 464   | (100.0) | 201 (43.3)                                 | 121 (26.1)        | 142 (30.6)    |         | 285 (62.0)  | 128 (27.8)        | 47 (10.2)                               |         |  |  |        |  |
| <b>Depression due to lockdown</b>                   |       |         |                                            |                   |               | <0.001  |             |                   |                                         |         |  |  | <0.001 |  |
| Yes                                                 | 523   | (100.0) | 82 (15.7)                                  | 124 (23.7)        | 317 (60.6)    |         | 151 (29.0)  | 236 (45.3)        | 134 (25.7)                              |         |  |  |        |  |

1  
2  
3  
4  
5  
6  
7  
8  
9  
10  
11  
12  
13  
14  
15  
16  
17  
18  
19  
20  
21  
22  
23  
24  
25  
26  
27  
28  
29  
30  
31  
32  
33  
34  
35  
36  
37  
38  
39  
40  
41  
42  
43  
44  
45  
46

|                                               | Total |         | UCL three-item loneliness scale (UCLATILS) |        |     |        |     |        | ONS Direct measure of loneliness (DMOL) |     |        |     |        |     |        |         |
|-----------------------------------------------|-------|---------|--------------------------------------------|--------|-----|--------|-----|--------|-----------------------------------------|-----|--------|-----|--------|-----|--------|---------|
|                                               | N     | (%)     | n                                          | (%)    | n   | (%)    | n   | (%)    | p-value                                 | n   | (%)    | n   | (%)    | n   | (%)    | p value |
| No                                            | 672   | (100.0) | 316                                        | (47.0) | 207 | (30.8) | 149 | (22.2) |                                         | 477 | (72.1) | 166 | (25.1) | 19  | (2.9)  |         |
| <b>Cancelation of the exams</b>               |       |         |                                            |        |     |        |     |        | 0.77                                    |     |        |     |        |     |        | 0.04    |
| Unhappy                                       | 276   | (100.0) | 89                                         | (32.3) | 77  | (27.9) | 110 | (39.9) |                                         | 126 | (45.8) | 104 | (37.8) | 45  | (16.4) |         |
| Neutral                                       | 793   | (100.0) | 267                                        | (33.7) | 215 | (27.1) | 311 | (39.2) |                                         | 429 | (54.8) | 260 | (33.2) | 94  | (12.0) |         |
| Happy                                         | 130   | (100.0) | 49                                         | (37.7) | 37  | (28.5) | 44  | (33.9) |                                         | 76  | (58.9) | 41  | (31.8) | 12  | (9.3)  |         |
| <b>Preference of online exams</b>             |       |         |                                            |        |     |        |     |        | 0.38                                    |     |        |     |        |     |        | 0.86    |
| Yes                                           | 494   | (100.0) | 158                                        | (32.0) | 140 | (28.3) | 196 | (39.7) |                                         | 261 | (53.3) | 164 | (33.5) | 65  | (13.3) |         |
| No                                            | 644   | (100.0) | 231                                        | (35.9) | 176 | (27.3) | 237 | (36.8) |                                         | 347 | (54.6) | 211 | (33.2) | 78  | (12.3) |         |
| <b>Sending child to school after lockdown</b> |       |         |                                            |        |     |        |     |        | 0.20                                    |     |        |     |        |     |        | 0.09    |
| Very unhappy                                  | 100   | (100.0) | 39                                         | (39.0) | 23  | (23.0) | 38  | (38.0) |                                         | 54  | (55.7) | 28  | (28.9) | 15  | (15.5) |         |
| Unhappy                                       | 158   | (100.0) | 59                                         | (37.3) | 48  | (30.4) | 51  | (32.3) |                                         | 89  | (58.2) | 48  | (31.4) | 16  | (10.5) |         |
| Neither unhappy nor happy                     | 230   | (100.0) | 86                                         | (37.4) | 64  | (27.8) | 80  | (34.8) |                                         | 130 | (57.0) | 69  | (30.3) | 29  | (12.7) |         |
| Happy                                         | 363   | (100.0) | 108                                        | (29.8) | 95  | (26.2) | 160 | (44.1) |                                         | 170 | (46.8) | 149 | (41.0) | 44  | (12.1) |         |
| Very happy                                    | 353   | (100.0) | 115                                        | (32.6) | 101 | (28.6) | 137 | (38.8) |                                         | 193 | (54.8) | 111 | (31.5) | 48  | (13.6) |         |
| <b>CHILD CHARACTERISTICS</b>                  |       |         |                                            |        |     |        |     |        |                                         |     |        |     |        |     |        |         |
| <b>Type of school</b>                         |       |         |                                            |        |     |        |     |        | 0.38                                    |     |        |     |        |     |        | 0.07    |
| State school                                  | 1082  | (100.0) | 356                                        | (32.9) | 302 | (27.9) | 424 | (39.2) |                                         | 559 | (52.2) | 366 | (34.2) | 146 | (13.6) |         |
| Private school                                | 128   | (100.0) | 50                                         | (39.1) | 32  | (25.0) | 46  | (35.9) |                                         | 77  | (60.6) | 41  | (32.3) | 9   | (7.1)  |         |
| <b>Private tuition</b>                        |       |         |                                            |        |     |        |     |        | 0.94                                    |     |        |     |        |     |        | 0.08    |
| Yes                                           | 115   | (100.0) | 40                                         | (34.8) | 32  | (27.8) | 43  | (37.4) |                                         | 70  | (60.9) | 37  | (32.2) | 8   | (7.0)  |         |
| No                                            | 1095  | (100.0) | 366                                        | (33.4) | 302 | (27.6) | 427 | (39.0) |                                         | 566 | (52.3) | 371 | (34.3) | 146 | (13.5) |         |
| <b>Time spent studying</b>                    |       |         |                                            |        |     |        |     |        | 0.04                                    |     |        |     |        |     |        | <0.001  |
| ≤2 hours                                      | 439   | (100.0) | 130                                        | (29.6) | 112 | (25.5) | 197 | (44.9) |                                         | 195 | (44.8) | 157 | (36.1) | 83  | (19.1) |         |
| 2-4 hours                                     | 365   | (100.0) | 124                                        | (34.0) | 109 | (29.9) | 132 | (36.2) |                                         | 202 | (55.8) | 119 | (32.9) | 41  | (11.3) |         |
| ≥4 hours                                      | 386   | (100.0) | 146                                        | (37.8) | 108 | (28.0) | 132 | (34.2) |                                         | 231 | (60.5) | 124 | (32.5) | 27  | (7.1)  |         |
| <b>Boredom</b>                                |       |         |                                            |        |     |        |     |        | <0.001                                  |     |        |     |        |     |        | <0.001  |

|                                                                  | Total |         | UCL three-item loneliness scale (UCLATILS) |        |          |        |      |        | ONS Direct measure of loneliness (DMOL) |        |          |        |      |        |         |
|------------------------------------------------------------------|-------|---------|--------------------------------------------|--------|----------|--------|------|--------|-----------------------------------------|--------|----------|--------|------|--------|---------|
|                                                                  | N     | (%)     | No                                         |        | Moderate |        | High |        | No                                      |        | Moderate |        | High |        | p-value |
|                                                                  |       |         | n                                          | (%)    | n        | (%)    | n    | (%)    | n                                       | (%)    | n        | (%)    | n    | (%)    | p value |
| Low                                                              | 74    | (100.0) | 40                                         | (54.1) | 16       | (21.6) | 18   | (24.3) | 50                                      | (68.5) | 18       | (24.7) | 5    | (6.8)  |         |
| Medium                                                           | 396   | (100.0) | 165                                        | (41.7) | 117      | (29.5) | 114  | (28.8) | 250                                     | (63.5) | 116      | (29.4) | 28   | (7.1)  |         |
| High                                                             | 734   | (100.0) | 200                                        | (27.2) | 199      | (27.1) | 335  | (45.6) | 334                                     | (45.9) | 273      | (37.6) | 120  | (16.5) |         |
| <b>Stress</b>                                                    |       |         |                                            |        |          |        |      |        |                                         |        |          |        |      |        | <0.001  |
| Low                                                              | 213   | (100.0) | 115                                        | (54.0) | 54       | (25.4) | 44   | (20.7) | 159                                     | (75.7) | 41       | (19.5) | 10   | (4.8)  |         |
| Medium                                                           | 531   | (100.0) | 190                                        | (35.8) | 158      | (29.8) | 183  | (34.5) | 308                                     | (58.6) | 177      | (33.7) | 41   | (7.8)  |         |
| High                                                             | 457   | (100.0) | 98                                         | (21.4) | 120      | (26.3) | 239  | (52.3) | 166                                     | (36.4) | 188      | (41.2) | 102  | (22.4) |         |
| <b>Signs of depression</b>                                       |       |         |                                            |        |          |        |      |        |                                         |        |          |        |      |        | <0.001  |
| Yes                                                              | 146   | (100.0) | 30                                         | (20.5) | 35       | (24.0) | 81   | (55.5) | 54                                      | (37.0) | 59       | (40.4) | 33   | (22.6) |         |
| No                                                               | 297   | (100.0) | 128                                        | (43.1) | 85       | (28.6) | 84   | (28.3) | 194                                     | (65.8) | 87       | (29.5) | 14   | (4.7)  |         |
| <b>Children complaining of feeling social isolated or lonely</b> |       |         |                                            |        |          |        |      |        |                                         |        |          |        |      |        | <0.001  |
| Yes                                                              | 521   | (100.0) | 85                                         | (16.3) | 137      | (26.3) | 299  | (57.4) | 170                                     | (32.8) | 231      | (44.6) | 117  | (22.6) |         |
| No                                                               | 685   | (100.0) | 321                                        | (46.9) | 196      | (28.6) | 168  | (24.5) | 466                                     | (68.9) | 175      | (25.9) | 35   | (5.2)  |         |
| <b>Physical activity levels before the lockdown</b>              |       |         |                                            |        |          |        |      |        |                                         |        |          |        |      |        | 0.27    |
| Low                                                              | 17    | (100.0) | 3                                          | (17.6) | 6        | (35.3) | 8    | (47.1) | 10                                      | (62.5) | 3        | (18.8) | 3    | (18.8) |         |
| Medium                                                           | 281   | (100.0) | 108                                        | (38.4) | 77       | (27.4) | 96   | (34.2) | 159                                     | (57.0) | 86       | (30.8) | 34   | (12.2) |         |
| High                                                             | 901   | (100.0) | 290                                        | (32.2) | 247      | (27.4) | 364  | (40.4) | 462                                     | (51.7) | 317      | (35.5) | 115  | (12.9) |         |
| <b>Physical activity levels during the lockdown</b>              |       |         |                                            |        |          |        |      |        |                                         |        |          |        |      |        | 0.62    |
| Low                                                              | 174   | (100.0) | 56                                         | (32.2) | 41       | (23.6) | 77   | (44.3) | 83                                      | (48.3) | 66       | (38.4) | 23   | (13.4) |         |
| Medium                                                           | 715   | (100.0) | 231                                        | (32.3) | 203      | (28.4) | 281  | (39.3) | 376                                     | (53.0) | 246      | (34.6) | 88   | (12.4) |         |
| High                                                             | 304   | (100.0) | 111                                        | (36.5) | 85       | (28.0) | 108  | (35.5) | 168                                     | (55.8) | 92       | (30.6) | 41   | (13.6) |         |
| <b>Readiness to undertake exams</b>                              |       |         |                                            |        |          |        |      |        |                                         |        |          |        |      |        | <0.001  |
| Ready                                                            | 217   | (100.0) | 83                                         | (38.2) | 51       | (23.5) | 83   | (38.2) | 285                                     | (46.2) | 233      | (37.8) | 99   | (16.0) |         |
| Neutral                                                          | 279   | (100.0) | 123                                        | (44.1) | 71       | (25.4) | 85   | (30.5) | 184                                     | (66.2) | 77       | (27.7) | 17   | (6.1)  |         |
| Unready                                                          | 627   | (100.0) | 178                                        | (28.4) | 186      | (29.7) | 263  | (41.9) | 126                                     | (58.3) | 65       | (30.1) | 25   | (11.6) |         |

**Appendix 1: Checklist for Reporting Results of Internet E-Surveys (CHERRIES)**

| <i>Item Category</i>                                                                 | <i>Checklist Item</i>            | <i>Page Number</i> | <i>Description</i>                                                                                                                                                                                                                                                                                                                                                                                                                                                                                                                                                                                                                                                                                                                                                                                  |
|--------------------------------------------------------------------------------------|----------------------------------|--------------------|-----------------------------------------------------------------------------------------------------------------------------------------------------------------------------------------------------------------------------------------------------------------------------------------------------------------------------------------------------------------------------------------------------------------------------------------------------------------------------------------------------------------------------------------------------------------------------------------------------------------------------------------------------------------------------------------------------------------------------------------------------------------------------------------------------|
| Design                                                                               | Study design                     | 4                  | The target population were adult (aged 18 years and over) parents and legal guardians of children who were attending primary or secondary education in the UK.                                                                                                                                                                                                                                                                                                                                                                                                                                                                                                                                                                                                                                      |
| IRB (Institutional Review Board) approval and informed consent process               | IRB approval                     | 6                  | The study was given ethical approval by the Head of Imperial College London PCPH Department, Professor Azeem Majeed, and by the Joint Research Compliance Office under the Imperial College Research Ethics Committee process (approval 20IC5978 ICREC HOD JRCO)                                                                                                                                                                                                                                                                                                                                                                                                                                                                                                                                    |
|                                                                                      | Informed consent                 | 4 and 5            | The link to the Participant Information Sheet was accessible on the eSurvey page and sent to heads of schools who were contacted. The PIS included information regarding the study such as the protection of the participants' personal data, their right to withdraw from the study at any time, the length of time of the survey, which data were stored, where and for how long, who the investigator was, and the purpose of the study. They were informed this was a voluntary survey without any monetary incentives but with offering the possibility to access the results and underlying the potential collective benefits of taking parts in terms of knowledge and policies. The first question of the survey asked participants to confirm their consent to participate in the eSurvey. |
|                                                                                      | Data protection                  | 5                  | The data collected were stored on the Imperial secure database and only the team researchers could access the eSurvey results.                                                                                                                                                                                                                                                                                                                                                                                                                                                                                                                                                                                                                                                                      |
| Development and pre-testing                                                          | Development and testing          | 4 and 5            | The study protocol and online survey were developed in collaboration with the Governing Board of Brackenbury Primary School in the London Borough of Hammersmith & Fulham. The online survey technical functionality was tested before being published.                                                                                                                                                                                                                                                                                                                                                                                                                                                                                                                                             |
| Recruitment process and description of the sample having access to the questionnaire | Open survey versus closed survey | 4                  | This was an open survey using a snowball sampling.                                                                                                                                                                                                                                                                                                                                                                                                                                                                                                                                                                                                                                                                                                                                                  |
|                                                                                      | Contact mode                     | 4                  | Part of the potentially eligible participants received an invitation email from the head teacher of schools where study information was disseminated including the Participant Information Sheet and link to the survey. The researchers' personal and professional networks were also mobilized through email and other messaging applications such as WhatsApp to respond and further disseminate the eSurvey among eligible participants.                                                                                                                                                                                                                                                                                                                                                        |
|                                                                                      | Advertising the survey           | 4                  | The study was advertised through head teachers of schools and researchers' networks                                                                                                                                                                                                                                                                                                                                                                                                                                                                                                                                                                                                                                                                                                                 |
| Survey                                                                               | Web/E-mail                       | 4                  | The survey was hosted by the Imperial College Qualtrics platform.                                                                                                                                                                                                                                                                                                                                                                                                                                                                                                                                                                                                                                                                                                                                   |

|                                                      |                                          |         |                                                                                                                                                                                                                                                                                                        |
|------------------------------------------------------|------------------------------------------|---------|--------------------------------------------------------------------------------------------------------------------------------------------------------------------------------------------------------------------------------------------------------------------------------------------------------|
| Administration                                       | Context                                  | p 10    | The Head Teacher of Brackenbury Primary School disseminated the survey to parents of that school to give parents the opportunity to reflect on an issue that is important to them given the nature of the study. This was a 'right-in-time' study earmarked for recruitment <i>during</i> the lockdown |
|                                                      | Mandatory/voluntary                      | 5       | This was a voluntary survey                                                                                                                                                                                                                                                                            |
|                                                      | Incentives                               | 4 and 5 | Participants were informed in the PIC that no monetary incentives were offered but non-monetary incentives such as the possibility to access the results and the potential collective benefits of taking parts in terms of knowledge and policies were mentioned.                                      |
|                                                      | Time/Date                                | 4       | The survey was accessible for a period of 9 weeks from 14 May 2020 to 4 July 2020.                                                                                                                                                                                                                     |
|                                                      | Randomization of items or questionnaires | -       | No randomization of items was used.                                                                                                                                                                                                                                                                    |
|                                                      | Adaptive questioning                     | -       | No adaptive questioning of items was used.                                                                                                                                                                                                                                                             |
|                                                      | Number of Items                          | 5       | The survey comprised a total of 51 questions.                                                                                                                                                                                                                                                          |
|                                                      | Number of screens (pages)                | 5       | All questions were displayed on one page and was accessible using a personal computer or smartphone.                                                                                                                                                                                                   |
|                                                      | Completeness check                       | 4       | Most items provided a non-response option such as "not applicable" or "rather not say", though not all. Selection of a response option to questions was not forced but were all fully completed. Analysis was conducted on fully completed questionnaires.                                             |
|                                                      | Review step                              | 5       | Participants could review their answers before submitting them.                                                                                                                                                                                                                                        |
| Response rates                                       | Unique site visitor                      | -       | Not applicable as response rates were not calculated.                                                                                                                                                                                                                                                  |
|                                                      | View rate                                | -       | Not applicable as response rates were not calculated.                                                                                                                                                                                                                                                  |
|                                                      | Participation rate                       | -       | Not applicable as response rates were not calculated.                                                                                                                                                                                                                                                  |
|                                                      | Completion rate                          | -       | Not applicable as response rates were not calculated.                                                                                                                                                                                                                                                  |
| Preventing multiple entries from the same individual | Cookies used                             | -       | No cookies were used.                                                                                                                                                                                                                                                                                  |
|                                                      | IP check                                 | -       | Qualtrics registered the IP address of respondents and did not allow a respondent for completing another survey from the same IP address for a period of one week.                                                                                                                                     |
|                                                      | Log file analysis                        | -       | No log files analysis.                                                                                                                                                                                                                                                                                 |
|                                                      | Registration                             | -       | No registration.                                                                                                                                                                                                                                                                                       |

|          |                                                     |   |                                                                   |
|----------|-----------------------------------------------------|---|-------------------------------------------------------------------|
| Analysis | Handling of incomplete questionnaires               | - | Only completed questionnaires were included in the final dataset. |
|          | Questionnaires submitted with an atypical timestamp | - | Not applicable                                                    |
|          | Statistical correction                              | - | None                                                              |

This checklist has been adapted from Eysenbach G. Improving the quality of Web surveys: the Checklist for Reporting Results of Internet E-Surveys (CHERRIES). J Med Internet Res. 2004 Sep 29;6(3):e34 [erratum in J Med Internet Res. 2012; 14(1): e8.]. Article available at <https://www.jmir.org/2004/3/e34/>; erratum available <https://www.jmir.org/2012/1/e8/>. Copyright ©Gunther Eysenbach. Originally published in the [Journal of Medical Internet Research](#), 29.9.2004 and 04.01.2012.

This is an open-access article distributed under the terms of the Creative Commons Attribution License (<https://creativecommons.org/licenses/by/2.0/>), which permits unrestricted use, distribution, and reproduction in any medium, provided the original work, first published in the Journal of Medical Internet Research, is properly cited.



# BMJ Open

## How is the COVID-19 lockdown impacting the mental health of parents of school-age children? A cross-sectional online survey

|                                 |                                                                                                                                                                                                                                                                                                                                                                                                                                                                                                                                                                                                                                                                                                                                                                                                                                                                                                                                                                                                           |
|---------------------------------|-----------------------------------------------------------------------------------------------------------------------------------------------------------------------------------------------------------------------------------------------------------------------------------------------------------------------------------------------------------------------------------------------------------------------------------------------------------------------------------------------------------------------------------------------------------------------------------------------------------------------------------------------------------------------------------------------------------------------------------------------------------------------------------------------------------------------------------------------------------------------------------------------------------------------------------------------------------------------------------------------------------|
| Journal:                        | <i>BMJ Open</i>                                                                                                                                                                                                                                                                                                                                                                                                                                                                                                                                                                                                                                                                                                                                                                                                                                                                                                                                                                                           |
| Manuscript ID                   | bmjopen-2020-043397.R1                                                                                                                                                                                                                                                                                                                                                                                                                                                                                                                                                                                                                                                                                                                                                                                                                                                                                                                                                                                    |
| Article Type:                   | Original research                                                                                                                                                                                                                                                                                                                                                                                                                                                                                                                                                                                                                                                                                                                                                                                                                                                                                                                                                                                         |
| Date Submitted by the Author:   | 14-Dec-2020                                                                                                                                                                                                                                                                                                                                                                                                                                                                                                                                                                                                                                                                                                                                                                                                                                                                                                                                                                                               |
| Complete List of Authors:       | <p>El-Osta, Austen; Imperial College London Faculty of Medicine, Self-Care Academic Research Unit (SCARU), Department of Primary Care &amp; Public Health</p> <p>Alaa, AOs; Imperial College London Faculty of Medicine, Self-Care Academic Research Unit (SCARU), Department of Primary Care &amp; Public Health</p> <p>Webber, Iman; Imperial College London Faculty of Medicine, Self-Care Academic Research Unit (SCARU), Department of Primary Care &amp; Public Health</p> <p>Riboli Sasco, Eva; Imperial College London Faculty of Medicine, Self-Care Academic Research Unit (SCARU), Department of Primary Care &amp; Public Health</p> <p>Bagkeris, Emmanouil; University College London, Department of Applied Health Research</p> <p>Millar, Helen L; The Carseview Centre, Psychiatry</p> <p>Vidal-Hall, Charlotte; Brackbury Primary School, Chair of Governing Board</p> <p>Majeed, Azeem; Imperial College London Faculty of Medicine, Department of Primary Care &amp; Public Health</p> |
| <b>Primary Subject Heading</b>: | Public health                                                                                                                                                                                                                                                                                                                                                                                                                                                                                                                                                                                                                                                                                                                                                                                                                                                                                                                                                                                             |
| Secondary Subject Heading:      | Health policy, Epidemiology, Qualitative research                                                                                                                                                                                                                                                                                                                                                                                                                                                                                                                                                                                                                                                                                                                                                                                                                                                                                                                                                         |
| Keywords:                       | PUBLIC HEALTH, MENTAL HEALTH, EPIDEMIOLOGY                                                                                                                                                                                                                                                                                                                                                                                                                                                                                                                                                                                                                                                                                                                                                                                                                                                                                                                                                                |
|                                 |                                                                                                                                                                                                                                                                                                                                                                                                                                                                                                                                                                                                                                                                                                                                                                                                                                                                                                                                                                                                           |

SCHOLARONE™  
Manuscripts



I, the Submitting Author has the right to grant and does grant on behalf of all authors of the Work (as defined in the below author licence), an exclusive licence and/or a non-exclusive licence for contributions from authors who are: i) UK Crown employees; ii) where BMJ has agreed a CC-BY licence shall apply, and/or iii) in accordance with the terms applicable for US Federal Government officers or employees acting as part of their official duties; on a worldwide, perpetual, irrevocable, royalty-free basis to BMJ Publishing Group Ltd ("BMJ") its licensees and where the relevant Journal is co-owned by BMJ to the co-owners of the Journal, to publish the Work in this journal and any other BMJ products and to exploit all rights, as set out in our [licence](#).

The Submitting Author accepts and understands that any supply made under these terms is made by BMJ to the Submitting Author unless you are acting as an employee on behalf of your employer or a postgraduate student of an affiliated institution which is paying any applicable article publishing charge ("APC") for Open Access articles. Where the Submitting Author wishes to make the Work available on an Open Access basis (and intends to pay the relevant APC), the terms of reuse of such Open Access shall be governed by a Creative Commons licence – details of these licences and which [Creative Commons](#) licence will apply to this Work are set out in our licence referred to above.

Other than as permitted in any relevant BMJ Author's Self Archiving Policies, I confirm this Work has not been accepted for publication elsewhere, is not being considered for publication elsewhere and does not duplicate material already published. I confirm all authors consent to publication of this Work and authorise the granting of this licence.

# How is the COVID-19 lockdown impacting the mental health of parents of school-age children? A cross-sectional online survey

- 
1. Austen El-Osta<sup>1\*</sup> [a.el-osta@imperial.ac.uk](mailto:a.el-osta@imperial.ac.uk)
  2. Aos Alaa<sup>1</sup> [aos.alaa18@imperial.ac.uk](mailto:aos.alaa18@imperial.ac.uk)
  3. Iman Webber<sup>1</sup> [i.webber@imperial.ac.uk](mailto:i.webber@imperial.ac.uk)
  4. Eva Riboli-Sasco<sup>1</sup> [e.riboli-sasco@imperial.ac.uk](mailto:e.riboli-sasco@imperial.ac.uk)
  5. Emmanouil Bagkeris<sup>2</sup> [e.bagkeris@imperial.ac.uk](mailto:e.bagkeris@imperial.ac.uk)
  6. Helen L Millar<sup>3</sup> [hlmillar1@gmail.com](mailto:hlmillar1@gmail.com)
  7. Charlotte Vidal Hall<sup>4</sup> [chall163.205@lgflmail.org](mailto:chall163.205@lgflmail.org)
  8. Azeem Majeed<sup>1</sup> [a.majeed@imperial.ac.uk](mailto:a.majeed@imperial.ac.uk)

- 1- Imperial College London, Department of Primary Care & Public Health
- 2- Imperial College London, National Health & Lung Institute
- 3- NHS Fife Community Service, Mental Health Service, Fife Health & Social Care Partnership
- 4- Chair of Governing Board, Brackenbury Primary School, London UK

\*Corresponding author

Dr Austen El-Osta, Self-Care Academic Research Unit (SCARU), Imperial College London Department of Primary Care & Public Health, 323 Reynolds Building, Charing Cross Hospital, St Dunstan's Road. London W6 8RP

Tel. 0207 594 7604

[a.el-osta@imperial.ac.uk](mailto:a.el-osta@imperial.ac.uk)

**Word count: 3866**

# ABSTRACT

## Objective

Investigate the impact of the COVID-19 lockdown on feelings of loneliness and social isolation in parents of school-age children

## Design

Cross sectional online survey of parents of primary and secondary school-age children

## Setting

Community setting

## Participants

1214 parents of school-age children in the United Kingdom

## Methods

An online survey explored the impact of lockdown on the mental health of parents with school-age children, and in particular about feelings of social isolation and loneliness. Associations between the UCLA three-item Loneliness Scale (UCLATILS), the Direct Measure of Loneliness (DMOL) and the characteristics of the study participants were assessed using ordinal logistic regression models

## Main outcome measures

Self-reported measures of social isolation and loneliness using UCLATILS and DMOL.

## Results

Half of respondents felt they lacked companionship, 45% had feelings of being left out, 58% felt isolated and 46% felt lonely. The factors that were associated with higher levels of loneliness on UCLATILS were female gender, parenting a child with special needs, lack of a dedicated space for distance learning, disruption of sleep patterns and low levels of physical activity during the lockdown. Factors associated with a higher DMOL were female gender, single-parenting, parenting a child with special needs, unemployment, low physical activity, lack of a dedicated study-space and disruption of sleep patterns during the lockdown.

## Conclusions

The COVID-19 lockdown has increased feelings of social isolation and loneliness among parents with school-age children. Two modifiable health seeking lifestyle behaviours such as increased levels of physical activity and the maintenance of good sleep hygiene practices during the lockdown were identified as key factors in reducing feelings of social isolation and loneliness.

## Article summary

### Strengths and limitations of this study

- We surveyed 1214 parents of school-age children to assess the impact of the lockdown measures on feelings of social isolation and loneliness
- We assessed direct and indirect measures of loneliness using the Direct Measure of Loneliness recommended by the Office of National Statistics and the validated UCLA 3-item Loneliness Scale
- We used Cohen's kappa to determine whether both direct (DMOL) and indirect (UCLATILS) measures of loneliness are correlated
- We also collected data on mental health, physical activity levels and other lifestyle factors during the first 100 days of the lockdown
- We used univariable and multivariable statistical models to determine the modifiable and non-modifiable risk factors associated with loneliness as assessed by two validated measures

## INTRODUCTION

The COVID-19 pandemic has affected educational systems worldwide, leading to the near-total closures of educational institutions in the United Kingdom. As of 6 May 2020, schools were suspended in 177 countries affecting over 1.3 billion learners worldwide (1), and in many cases closures have resulted in the universal cancellation of examinations (2, 3). UNICEF estimated that almost four months of education will be lost as a result of the lockdown (4). School closures have far-reaching economic and societal consequences, including the disruption of everyday behaviours and routines. In the UK, over two million workers have already lost their jobs (5, 6), and although the long-term impact of the pandemic on education is not yet clear, the pre-existing attainment gap between the poorest and richest children (7) may widen significantly as a result of COVID-19 (4, 8, 9). Children and young people make up 21% of the population of England (10), and by the time they returned to school after the summer break, some would have been out of education for nearly six months.

Lockdown measures significantly limit social interactions, opportunities for social intercourse or the ability to receive the social support needed to promote mental well-being (11). The temporary closure of schools also means that children miss out on vital social skills and physical activity which may cause further detriment to their mental health and the quality of their social interaction with their parents and other members of the household (12). Loss of routine social contact could also lead to different patterns of social response (13, 14) whilst increasing feelings of social isolation and loneliness (15-17). There is growing concern over the impact of school closures on the mental health and well-being of parents and school-age children (18-20), and in particular about increasing feelings of social isolation and loneliness (21).

The impact of loneliness on public mental health is well characterised (22), and includes depression (23, 24), anxiety (25) and suicide (26, 27), and is also linked with

1  
2  
3 cardiovascular conditions (28, 29) and cancer (30). Prolonged periods of loneliness  
4 and social isolation are also associated with future mental health problems up to 9  
5 years later (31), including a strong association with depression (32) and stress (33).  
6 Although acknowledged to be different concepts, social isolation and loneliness may  
7 affect people of all ages (34), and the terms are used interchangeably such that they  
8 are often considered together (35). There have been numerous attempts in the  
9 literature to identify predictors of loneliness (31, 36, 37), but this subjective  
10 phenomenon remains difficult to measure, and its prevalence is thought to be  
11 significantly under-represented. Known predictors of loneliness include living alone,  
12 living in rented accommodation, household size, education level, self-reported health  
13 measures and, paradoxically, living in population-dense areas.  
14  
15

16  
17 The measurement of social isolation and loneliness is challenging as it is largely  
18 subjective and qualitative in nature (38). The UK Office for National Statistics (ONS)  
19 recommends the use of the validated UCLA three-item loneliness scale (UCLATILS)  
20 as an indirect measure for loneliness, and an additional Direct Measure of Loneliness  
21 (DMOL) question (39). ONS recommends attempting to harmonise these indicators  
22 across the UK Government Statistical Service, but the recency of the  
23 recommendations may be a reason behind the lack of standardised and retrospective  
24 data on loneliness in the UK. Although both scores measure loneliness, they are  
25 fundamentally different. The composite score of UCLATIS measures general and  
26 indirect loneliness and feelings of social isolation, whereas the DMOL is a separate  
27 (single item) measure that assesses the current/temporal feeling of loneliness by the  
28 respondent and is recommended for use by ONS  
29  
30

31  
32 Successful interventions aimed at tackling social isolation and loneliness include  
33 leveraging existing community assets such as parks and green spaces, befriending  
34 schemes, skill development strategies, psychological therapies (40-43). The UK  
35 government published its first Loneliness Strategy in October 2018, signalling the first  
36 important step in tackling this rising problem of society. Preventative measures that  
37 can be implemented to reduce the risk of social isolation and loneliness and bridge  
38 social distancing during lockdown include the use of digital technologies. China and  
39 Singapore established various initiatives to minimise outbreak-related stress and poor  
40 mental wellbeing including the deployment of enhanced social support networks and  
41 psychological services that could be delivered online (44-46). Teachers can also play  
42 an important role in alleviating a child's sense of isolation at school (47, 48), but the  
43 extent to which this can be accomplished with live or online lessons through remote  
44 learning remains unclear. Reports have already documented loneliness in the elderly  
45 as a result of the COVID-19 lockdown (49), but research regarding this aspect of  
46 mental health on parents with school-age children during the pandemic is scarce in  
47 the first 100 days after the lockdown and this population remains largely understudied.  
48  
49

### 50 51 **Study objectives**

52 The aim of this study was to explore how the lockdown is affecting the mental health  
53 of parents of school-age children, and in particular to assess the impact of an extended  
54 period of school closures on feelings of social isolation & loneliness.  
55  
56  
57  
58  
59  
60

# METHODS

## Study design

We conducted a cross-sectional online survey of adult parents and legal guardians of children who were attending primary or secondary education in the UK.

The link to the electronic survey was published and available on the Imperial College Qualtrics platform between 29 May and 11 July 2020 (6 weeks). The survey was open and could be accessed by anyone with a link. Potentially eligible participants received an invitation email from the study team, and the head teacher of Brackenbury Primary School also disseminated the email and link to his counterparts in other schools. Study information was disseminated including the Participant Information Sheet (PIS) and link to the survey. The researchers' personal and professional networks were also mobilized to respond and further disseminate the eSurvey among eligible participants. The PIS included information regarding the study's aims, the protection of participants' personal data, their right to withdraw from the study at any time, which data were stored, where and for how long, who the investigator was, the purpose of the study and survey length. Participants were informed that this was a voluntary survey without any monetary incentives but offering the possibility to access the findings at a later stage whilst underlying the potential collective benefits of taking part in terms of helping advance knowledge in this area and the formulation of future policies to tackle the COVID-19 pandemic. The data collected were stored on the Imperial College London secure database and only the team researchers could access the eSurvey results.

The survey comprised a total of 51 questions displayed on one page and was accessible using a personal computer or smartphone. Questions regarding demographic characteristics of the users included information on gender, age, ethnicity, educational level, number of people living in the household, first part of postal code and employment status. Participants could review their answers before submitting them. All data collected through the survey were anonymised and not personally identifiable. The online survey technical functionality was tested before being published. The first question asked participants to confirm their consent to participate in the eSurvey.

Experiences and perceptions related to the impact of the lockdown on the mental health of parents and other members of their household were evaluated through a number of questions concerning self-reported or perceived levels of depression, stress, feeling of loneliness, social isolation and boredom. Indirect measures of loneliness were measured using the validated UCLA 3-item Loneliness Scale (UCLATILS) with responses never/hardly ever (score of 1), some of the time (score of 2), and often (score of 3) (50). The questions were each scored 1 to 3, then totalled to a score ranging from 3 to 9. Indirect measure of loneliness using UCLATILS was subsequently categorized as follows: no loneliness (score =3), moderate loneliness (score = 4-6), and severe loneliness (score = 7-9). An additional one item Direct Measure of Loneliness (DMOL) was also used as recommended by the Office of National Statistics (51). Questions concerning users' experiences were scored on a 1-5 Likert scale. Respondents were able to refrain from providing an answer by selecting 'no opinion'. Such answers were treated as missing data in all the analyses (listwise exclusion) but due to the small number of missingness (<1.5%) the data were not



1  
2  
3 imputed (52, 53). The association of the two scores was tested using the Cohen's  
4 kappa test of agreement.  
5

6  
7 The survey included eleven additional questions to explore perceptions of feelings of  
8 social isolation pre- and post-school closures. Perceptions on remote learning were  
9 explored through questions related to whether or not their child received regular  
10 homework, live or online lessons, had access to technology (personal computer, tablet  
11 or phone), time spent studying, and whether the child had access to a dedicated space  
12 to study. Perceptions on the impact of school closures on the lifestyle behaviours of  
13 respondents and their school children were recorded by asking questions relating to  
14 pre- and post-lockdown self-reported measures of physical activity levels of both  
15 parents and children, the children's sleeping patterns and how children spent their  
16 leisure time. The quality of the survey was assessed by completing the Checklist for  
17 Reporting Results of Internet E-Surveys (CHERRIES).  
18  
19

### 20 **Statistical analysis**

21 Analyses were conducted separately for the UCLATILS and DMOL as recommended  
22 by the ONS (51). Parent and child characteristics were described using frequencies  
23 and percentages. Pearson's chi-square test was used to identify differences of  
24 statistical significance. Associations between the UCLATILS, DMOL and the  
25 characteristics of the study participants were assessed using ordinal logistic  
26 regression models. The factors that were significant in the univariable models (p-value  
27 <0.05) were considered in the multivariable analyses. All analyses were performed  
28 using Stata 15 statistical software (StataCorp).  
29  
30

### 31 **Ethics**

32 The study was given ethical approval by Imperial College Research Ethics Committee  
33 (ICREC # 20IC5978). Participants consented to take part in the survey.  
34  
35

### 36 **Patient and Public Involvement**

37 No patient was involved. The study protocol and online survey were developed in  
38 collaboration with the Governing Board of Brackenbury Primary School in the London  
39 Borough of Hammersmith & Fulham where the lead author is also a co-opted School  
40 governor  
41  
42  
43  
44  
45  
46  
47  
48  
49  
50  
51  
52  
53  
54  
55  
56  
57  
58  
59  
60

# RESULTS

## Demographic profile of respondents

The electronic survey captured responses from 1214 respondents from across England (**Table 1**). More than half (53.1%) were aged 40-49 years, whereas 2.5%, 29.2%, 14.4% and 0.9% were in the second, third, fifth or sixth decade of age respectively. Eighty seven percent of respondents were female, and 80.5% identified as white ethnic background. Sixty six percent were educated to university degree, 70.9% were in full or part-time employment and 87.1% had a partner that was employed. A fifth (20.8%) had one child, 53.5% had two children, and 25.8% had three or more children. Only 3.8% were a single parent family, whereas 75.3% of respondents were living in households consisting of 4 or more people.

## School and children characteristics

Nine out of ten (89.5%) children attended a state funded school. More than half (54.1%) of respondents had a child receiving primary education, 22.3% in secondary school and 23.6% had more than one child, one attending either primary or secondary schools. Eleven percent of respondents had a child a special educational need or disability (SEND) . Sixty eight percent indicated that their child had access to a dedicated space where they can learn or study at home. The vast majority (97.9%) of children had access to a personal computer, laptop, tablet or smartphone, of whom 54.0% had their own devices and 43.9% did not have their own but could access devices belonging to other members of their household and two percent did not have access to any technology. Remote learning was accessed by 90.7% of children, but only 47.7% of respondents reported their child was receiving live or online lessons. Only 9.5% of children received private tuition. The time spent on remote learning ranged between 0-8 hours per day, with 36.8% studying for less than 2 hours, 30.7% studying between 2-4 hours and 32.5% studding more than 4 hours.

## Mental health and physical wellbeing

The vast majority of respondents felt their children were experiencing medium to high levels of boredom (93.8%) and medium or high levels of stress (82.3%) during the lockdown compared to before school closures. Almost half of the participants (48.1%) have reported a shift in the sleeping pattern of children by staying up until much later in the evening during the lockdown. Only 37.2% of respondents reported that the sleeping patterns of their children did not change during the lockdown. Forty-five percent reported that their levels of physical activity were low during the lockdown. Seventy percent of respondents felt that school closures also reduced the physical activity of their child.

Table 1: Respondent characteristics

|                               | Total |         | UCL three-item loneliness scale (UCLATILS) |        |          |        |      |        | ONS Direct measure of loneliness (DMOL) |     |          |     |        |     |         |         |
|-------------------------------|-------|---------|--------------------------------------------|--------|----------|--------|------|--------|-----------------------------------------|-----|----------|-----|--------|-----|---------|---------|
|                               | N     | (%)     | No                                         |        | Moderate |        | High |        | No                                      |     | Moderate |     | High   |     | p value |         |
|                               |       |         | n                                          | (%)    | n        | (%)    | n    | (%)    | p-value                                 | n   | (%)      | n   | (%)    | n   | (%)     | p value |
| <b>PARENT CHARACTERISTICS</b> |       |         |                                            |        |          |        |      |        |                                         |     |          |     |        |     |         |         |
| <b>Age group</b>              |       |         |                                            |        |          |        |      |        | 0.05                                    |     |          |     |        |     |         | 0.004   |
| 20-29                         | 30    | (100.0) | 6                                          | (20.0) | 10       | (33.3) | 14   | (46.7) |                                         | 9   | (30.0)   | 13  | (43.3) | 8   | (26.7)  |         |
| 30-39                         | 354   | (100.0) | 122                                        | (34.5) | 85       | (24.0) | 147  | (41.5) |                                         | 166 | (47.6)   | 127 | (36.4) | 56  | (16.0)  |         |
| 40-49                         | 643   | (100.0) | 202                                        | (31.4) | 184      | (28.6) | 257  | (40.0) |                                         | 346 | (54.3)   | 219 | (34.4) | 72  | (11.3)  |         |
| 50-59                         | 174   | (100.0) | 73                                         | (42.0) | 52       | (29.9) | 49   | (28.2) |                                         | 109 | (63.0)   | 46  | (26.6) | 18  | (10.4)  |         |
| 60+                           | 11    | (100.0) | 4                                          | (36.4) | 3        | (27.3) | 4    | (36.4) |                                         | 7   | (63.6)   | 3   | (27.3) | 1   | (9.1)   |         |
| <b>Gender</b>                 |       |         |                                            |        |          |        |      |        | <0.001                                  |     |          |     |        |     |         | 0.002   |
| Male                          | 149   | (100.0) | 75                                         | (50.3) | 31       | (20.8) | 43   | (28.9) |                                         | 99  | (66.4)   | 39  | (26.2) | 11  | (7.4)   |         |
| Female                        | 1062  | (100.0) | 331                                        | (31.2) | 303      | (28.5) | 428  | (40.3) |                                         | 537 | (51.1)   | 369 | (35.1) | 144 | (13.7)  |         |
| <b>Ethnicity</b>              |       |         |                                            |        |          |        |      |        | 0.23                                    |     |          |     |        |     |         | 0.42    |
| White                         | 962   | (100.0) | 322                                        | (33.5) | 269      | (28.0) | 371  | (38.6) |                                         | 512 | (53.7)   | 322 | (33.8) | 120 | (12.6)  |         |
| Black                         | 25    | (100.0) | 7                                          | (28.0) | 5        | (20.0) | 13   | (52.0) |                                         | 11  | (45.8)   | 8   | (33.3) | 5   | (20.8)  |         |
| Asian                         | 101   | (100.0) | 27                                         | (26.7) | 25       | (24.8) | 49   | (48.5) |                                         | 43  | (43.4)   | 39  | (39.4) | 17  | (17.2)  |         |
| Mixed/other                   | 107   | (100.0) | 42                                         | (39.3) | 30       | (28.0) | 35   | (32.7) |                                         | 60  | (56.6)   | 34  | (32.1) | 12  | (11.3)  |         |
| <b>Level of education</b>     |       |         |                                            |        |          |        |      |        | 0.15                                    |     |          |     |        |     |         | 0.004   |
| Secondary school              | 274   | (100.0) | 92                                         | (33.6) | 67       | (24.5) | 115  | (42.0) |                                         | 125 | (46.3)   | 95  | (35.2) | 50  | (18.5)  |         |
| Diploma                       | 127   | (100.0) | 40                                         | (31.5) | 34       | (26.8) | 53   | (41.7) |                                         | 64  | (51.2)   | 42  | (33.6) | 19  | (15.2)  |         |
| Bachelor's Degree             | 446   | (100.0) | 151                                        | (33.9) | 126      | (28.3) | 169  | (37.9) |                                         | 234 | (53.1)   | 155 | (35.1) | 52  | (11.8)  |         |
| Master's Degree               | 264   | (100.0) | 81                                         | (30.7) | 77       | (29.2) | 106  | (40.2) |                                         | 152 | (57.8)   | 90  | (34.2) | 21  | (8.0)   |         |
| Doctorate                     | 88    | (100.0) | 39                                         | (44.3) | 28       | (31.8) | 21   | (23.9) |                                         | 58  | (65.9)   | 21  | (23.9) | 9   | (10.2)  |         |
| <b>Employment</b>             |       |         |                                            |        |          |        |      |        | 0.15                                    |     |          |     |        |     |         | 0.001   |
| Employed full-time            | 479   | (100.0) | 168                                        | (35.1) | 143      | (29.9) | 168  | (35.1) |                                         | 264 | (55.5)   | 158 | (33.2) | 54  | (11.3)  |         |
| Employed part-time            | 372   | (100.0) | 121                                        | (32.5) | 98       | (26.3) | 153  | (41.1) |                                         | 189 | (51.2)   | 133 | (36.0) | 47  | (12.7)  |         |

|                                                     | Total |         | UCL three-item loneliness scale (UCLATILS) |        |          |        |      |        | ONS Direct measure of loneliness (DMOL) |     |          |     |        |     |         |         |
|-----------------------------------------------------|-------|---------|--------------------------------------------|--------|----------|--------|------|--------|-----------------------------------------|-----|----------|-----|--------|-----|---------|---------|
|                                                     | N     | (%)     | No                                         |        | Moderate |        | High |        | No                                      |     | Moderate |     | High   |     | p value |         |
|                                                     |       |         | n                                          | (%)    | n        | (%)    | n    | (%)    | p-value                                 | n   | (%)      | n   | (%)    | n   | (%)     | p value |
| Self-employed                                       | 182   | (100.0) | 63                                         | (34.6) | 52       | (28.6) | 67   | (36.8) |                                         | 107 | (59.4)   | 59  | (32.8) | 14  | (7.8)   |         |
| Not working**                                       | 170   | (100.0) | 53                                         | (31.2) | 37       | (21.8) | 80   | (47.1) |                                         | 74  | (44.3)   | 55  | (32.9) | 38  | (22.8)  |         |
| <b>Number of people in the household</b>            |       |         |                                            |        |          |        |      |        | 0.37                                    |     |          |     |        |     |         | 0.024   |
| 2                                                   | 45    | 100.0)  | 11                                         | (24.4) | 11       | (24.4) | 23   | (51.1) |                                         | 13  | (28.9)   | 21  | (46.7) | 11  | (24.4)  |         |
| 3                                                   | 249   | 100.0)  | 85                                         | (34.1) | 66       | (26.5) | 98   | (39.4) |                                         | 136 | (54.6)   | 76  | (30.5) | 37  | (14.9)  |         |
| 4                                                   | 597   | 100.0)  | 201                                        | (33.7) | 173      | (29.0) | 223  | (37.4) |                                         | 323 | (54.9)   | 202 | (34.4) | 63  | (10.7)  |         |
| 5                                                   | 208   | (100.0) | 76                                         | (36.5) | 58       | (27.9) | 74   | (35.6) |                                         | 114 | (55.3)   | 63  | (30.6) | 29  | (14.1)  |         |
| 6+                                                  | 94    | (100.0) | 29                                         | (30.9) | 20       | (21.3) | 45   | (47.9) |                                         | 46  | (49.5)   | 35  | (37.6) | 12  | (12.9)  |         |
| <b>Physical activity levels during the lockdown</b> |       |         |                                            |        |          |        |      |        | 0.001                                   |     |          |     |        |     |         | <0.001  |
| Low                                                 | 176   | (100.0) | 48                                         | (27.3) | 50       | (28.4) | 78   | (44.3) |                                         | 85  | (48.9)   | 51  | (29.3) | 38  | (21.8)  |         |
| Medium                                              | 575   | (100.0) | 178                                        | (31.0) | 153      | (26.6) | 244  | (42.4) |                                         | 279 | (48.9)   | 220 | (38.5) | 72  | (12.6)  |         |
| High                                                | 436   | (100.0) | 175                                        | (40.1) | 123      | (28.2) | 138  | (31.7) |                                         | 262 | (60.9)   | 126 | (29.3) | 42  | (9.8)   |         |
| <b>CHILD CHARACTERISTICS</b>                        |       |         |                                            |        |          |        |      |        |                                         |     |          |     |        |     |         |         |
| <b>Level of schooling</b>                           |       |         |                                            |        |          |        |      |        | 0.04                                    |     |          |     |        |     |         | 0.001   |
| Primary                                             | 656   | (100.0) | 209                                        | (31.9) | 171      | (26.1) | 276  | (42.1) |                                         | 319 | (49.1)   | 226 | (34.8) | 105 | (16.2)  |         |
| Secondary                                           | 270   | (100.0) | 106                                        | (39.3) | 78       | (28.9) | 86   | (31.9) |                                         | 165 | (61.1)   | 81  | (30.0) | 24  | (8.9)   |         |
| Both (I have ≥1 child)                              | 285   | (100.0) | 91                                         | (31.9) | 85       | (29.8) | 109  | (38.3) |                                         | 152 | (54.5)   | 101 | (36.2) | 26  | (9.3)   |         |
| <b>Special needs</b>                                |       |         |                                            |        |          |        |      |        | 0.009                                   |     |          |     |        |     |         | 0.008   |
| Yes                                                 | 133   | (100.0) | 35                                         | (26.3) | 30       | (22.6) | 68   | (51.1) |                                         | 53  | (40.8)   | 53  | (40.8) | 24  | (18.5)  |         |
| No                                                  | 1077  | (100.0) | 371                                        | (34.4) | 304      | (28.2) | 402  | (37.3) |                                         | 583 | (54.6)   | 354 | (33.1) | 131 | (12.3)  |         |
| <b>Dedicated space to study</b>                     |       |         |                                            |        |          |        |      |        | 0.001                                   |     |          |     |        |     |         | <0.001  |
| Yes                                                 | 831   | (100.0) | 304                                        | (36.6) | 230      | (27.7) | 297  | (35.7) |                                         | 476 | (57.8)   | 256 | (31.1) | 91  | (11.1)  |         |
| No                                                  | 379   | (100.0) | 102                                        | (26.9) | 104      | (27.4) | 173  | (45.6) |                                         | 160 | (42.7)   | 151 | (40.3) | 64  | (17.1)  |         |
| <b>Access to technology</b>                         |       |         |                                            |        |          |        |      |        | 0.02                                    |     |          |     |        |     |         | <0.001  |
| Yes                                                 | 653   | (100.0) | 240                                        | (36.8) | 173      | (26.5) | 240  | (36.8) |                                         | 380 | (58.8)   | 195 | (30.2) | 71  | (11.0)  |         |
| Yes, but not their own                              | 532   | (100.0) | 162                                        | (30.5) | 157      | (29.5) | 213  | (40.0) |                                         | 253 | (47.8)   | 202 | (38.2) | 74  | (14.0)  |         |

1  
2  
3  
4  
5  
6  
7  
8  
9  
10  
11  
12  
13  
14  
15  
16  
17  
18  
19  
20  
21  
22  
23  
24  
25  
26  
27  
28  
29  
30  
31  
32  
33  
34  
35  
36  
37  
38  
39  
40  
41  
42  
43  
44  
45  
46

|                                                | Total |         | UCL three-item loneliness scale (UCLATILS) |          |      |         |     |        | ONS Direct measure of loneliness (DMOL) |          |      |         |     |        |     |        |
|------------------------------------------------|-------|---------|--------------------------------------------|----------|------|---------|-----|--------|-----------------------------------------|----------|------|---------|-----|--------|-----|--------|
|                                                | N     | (%)     | No                                         | Moderate | High | p-value |     |        | No                                      | Moderate | High | p value |     |        |     |        |
|                                                | n     | (%)     | n                                          | (%)      | n    | (%)     | n   | (%)    | n                                       | (%)      | n    | (%)     | n   | (%)    |     |        |
| No                                             | 25    | (100.0) | 5                                          | (20.0)   | 4    | (16.0)  | 16  | (64.0) |                                         |          | 4    | (17.4)  | 10  | (43.5) | 9   | (39.1) |
| <b>In receipt of distance learning</b>         |       |         |                                            |          |      |         |     |        | 0.46                                    |          |      |         |     |        |     | 0.03   |
| Yes                                            | 1101  | (100.0) | 375                                        | (34.1)   | 301  | (27.3)  | 425 | (38.6) |                                         |          | 589  | (54.0)  | 368 | (33.8) | 133 | (12.2) |
| No                                             | 110   | (100.0) | 31                                         | (28.2)   | 33   | (30.0)  | 46  | (41.8) |                                         |          | 47   | (43.1)  | 40  | (36.7) | 22  | (20.2) |
| <b>In receipt of live/online lessons</b>       |       |         |                                            |          |      |         |     |        | 0.24                                    |          |      |         |     |        |     | 0.001  |
| Yes                                            | 409   | (100.0) | 142                                        | (34.7)   | 116  | (28.4)  | 151 | (36.9) |                                         |          | 234  | (57.6)  | 133 | (32.8) | 39  | (9.6)  |
| No                                             | 449   | (100.0) | 139                                        | (31.0)   | 119  | (26.5)  | 191 | (42.5) |                                         |          | 210  | (47.1)  | 160 | (35.9) | 76  | (17.0) |
| <b>Sleeping pattern</b>                        |       |         |                                            |          |      |         |     |        | <0.001                                  |          |      |         |     |        |     | <0.001 |
| No major change in sleeping pattern            | 449   | (100.0) | 187                                        | (41.6)   | 128  | (28.5)  | 134 | (29.8) |                                         |          | 285  | (63.9)  | 123 | (27.6) | 38  | (8.5)  |
| Slight change                                  | 168   | (100.0) | 61                                         | (36.3)   | 44   | (26.2)  | 63  | (37.5) |                                         |          | 90   | (54.9)  | 53  | (32.3) | 21  | (12.8) |
| child now sleeps much later in the evening     | 580   | (100.0) | 153                                        | (26.4)   | 158  | (27.2)  | 269 | (46.4) |                                         |          | 253  | (44.0)  | 229 | (39.8) | 93  | (16.2) |
| child now sleeping much earlier in the evening | 9     | (100.0) | 4                                          | (44.4)   | 3    | (33.3)  | 2   | (22.2) |                                         |          | 7    | (77.8)  | 1   | (11.1) | 1   | (11.1) |

**Table 2: Univariable and multivariable association of three-item UCLATILS with characteristics of study participants**

|                                                                  | Univariable       |         | Multivariable        |         |
|------------------------------------------------------------------|-------------------|---------|----------------------|---------|
|                                                                  | OR (95% CI)       | p-value | Adjusted OR (95% CI) | p-value |
| <b>Age</b>                                                       |                   |         |                      |         |
| 50+                                                              | <i>Ref.</i>       |         | <i>Ref.</i>          |         |
| 20-39                                                            | 1.56 (1.12, 2.16) | 0.008   | 1.26 (0.85, 1.86)    | 0.24    |
| 40-49                                                            | 1.59 (1.18, 2.16) | 0.003   | 1.38 (0.98, 1.94)    | 0.07    |
| <b>Gender of the parent</b>                                      |                   |         |                      |         |
| Male                                                             | <i>Ref.</i>       |         | <i>Ref.</i>          |         |
| Female                                                           | 2.03 (1.46, 2.82) | <0.001  | 1.82 (1.29, 2.57)    | 0.001   |
| <b>Level of schooling</b>                                        |                   |         |                      |         |
| Secondary                                                        | <i>Ref.</i>       |         | <i>Ref.</i>          |         |
| Primary                                                          | 1.41 (1.08, 1.83) | 0.011   | 1.28 (0.94, 1.75)    | 0.12    |
| Both (more than 1 child)                                         | 1.32 (0.97, 1.79) | 0.079   | 1.13 (0.81, 1.59)    | 0.47    |
| <b>Access to technology</b>                                      |                   |         |                      |         |
| Yes                                                              | <i>Ref.</i>       |         | <i>Ref.</i>          |         |
| No                                                               | 2.51 (1.11, 5.71) | 0.03    | 1.62 (0.70, 3.74)    | 0.26    |
| <b>Special needs</b>                                             |                   |         |                      |         |
| No                                                               | <i>Ref.</i>       |         | <i>Ref.</i>          |         |
| Yes                                                              | 1.66 (1.18, 2.35) | 0.004   | 1.44 (1.01, 2.06)    | 0.04    |
| <b>Dedicated space</b>                                           |                   |         |                      |         |
| Yes                                                              | <i>Ref.</i>       |         | <i>Ref.</i>          |         |
| No                                                               | 1.52 (1.21, 1.91) | <0.001  | 1.33 (1.04, 1.69)    | 0.02    |
| <b>Change in the sleeping patterns</b>                           |                   |         |                      |         |
| No                                                               | <i>Ref.</i>       |         | <i>Ref.</i>          |         |
| Slight disruption                                                | 1.31 (0.94, 1.82) | 0.110   | 1.27 (0.91, 1.78)    | 0.16    |
| Marked disruption*                                               | 1.95 (1.55, 2.46) | <0.001  | 1.90 (1.50, 2.41)    | <0.001  |
| <b>Physical activity level of the parent during the lockdown</b> |                   |         |                      |         |
| High                                                             | <i>Ref.</i>       |         | <i>Ref.</i>          |         |
| Low                                                              | 1.77 (1.28, 2.45) | 0.001   | 1.53 (1.09, 2.14)    | 0.01    |
| Medium                                                           | 1.56 (1.24, 1.97) | <0.001  | 1.45 (1.14, 1.84)    | 0.002   |

\*Applies to children who's sleeping pattern changed and slept much earlier or later than prior to lockdown

**Table 3: Univariable and multivariable association of ONS Direct Measure of Loneliness (DMOL) score with characteristics of study participants**

|                                                                  | Univariable       |         | Multivariable        |         |
|------------------------------------------------------------------|-------------------|---------|----------------------|---------|
|                                                                  | OR (95% CI)       | p-value | Adjusted OR (95% CI) | p-value |
| <b>Age</b>                                                       |                   |         |                      |         |
| 50+                                                              | <i>Ref.</i>       |         | <i>Ref.</i>          |         |
| 20-39                                                            | 1.98 (1.38, 2.85) | <0.001  | 1.47 (0.95, 2.27)    | 0.09    |
| 40-49                                                            | 1.37 (0.97, 1.92) | 0.07    | 1.22 (0.83, 1.79)    | 0.32    |
| <b>Gender of the parent</b>                                      |                   |         |                      |         |
| Male                                                             | <i>Ref.</i>       |         | <i>Ref.</i>          |         |
| Female                                                           | 1.88 (1.31, 2.71) | 0.001   | 1.52 (1.03, 2.24)    | 0.03    |
| <b>Education</b>                                                 |                   |         |                      |         |
| University degree or higher                                      | <i>Ref.</i>       |         | <i>Ref.</i>          |         |
| Secondary school or high school diploma                          | 1.50 (1.18, 1.90) | 0.001   | 1.27 (0.98, 1.64)    | 0.07    |
| <b>Employment status</b>                                         |                   |         |                      |         |
| Employed                                                         | <i>Ref.</i>       |         | <i>Ref.</i>          |         |
| Unemployed*                                                      | 1.83 (1.32, 2.53) | <0.001  | 1.70 (1.21, 2.38)    | 0.002   |
| <b>Physical activity level of the parent during the lockdown</b> |                   |         |                      |         |
| High                                                             | <i>Ref.</i>       |         | <i>Ref.</i>          |         |
| Medium                                                           | 1.62 (1.26, 2.08) | <0.001  | 1.53 (1.18, 1.99)    | 0.002   |
| Low                                                              | 1.86 (1.30, 2.64) | 0.001   | 1.53 (1.06, 2.21)    |         |
| <b>Number of people at home</b>                                  |                   |         |                      |         |
| 3 or above                                                       | <i>Ref.</i>       |         | <i>Ref.</i>          |         |
| Single parent family                                             | 2.49 (1.42, 4.39) | 0.002   | 2.12 (1.17, 3.82)    | 0.01    |
| <b>Level of schooling</b>                                        |                   |         |                      |         |
| Secondary                                                        | <i>Ref.</i>       |         | <i>Ref.</i>          |         |
| Primary                                                          | 1.65 (1.23, 2.20) | 0.001   | 1.35 (0.96, 1.92)    | 0.09    |
| Both (more than 1 child)                                         | 1.31 (0.94, 1.84) | 0.11    | 1.05 (0.72, 1.53)    | 0.79    |
| <b>Access to technology</b>                                      |                   |         |                      |         |
| Yes                                                              | <i>Ref.</i>       |         | <i>Ref.</i>          |         |
| No                                                               | 4.09 (1.86, 8.99) | <0.001  | 1.60 (0.69, 3.71)    | 0.28    |
| <b>Special needs</b>                                             |                   |         |                      |         |
| No                                                               | <i>Ref.</i>       |         | <i>Ref.</i>          |         |
| Yes                                                              | 1.82 (1.28, 2.58) | 0.001   | 1.45 (1.01, 2.08)    | 0.05    |
| <b>Dedicated space</b>                                           |                   |         |                      |         |

|                                        | Univariable       |         | Multivariable        |         |
|----------------------------------------|-------------------|---------|----------------------|---------|
|                                        | OR (95% CI)       | p-value | Adjusted OR (95% CI) | p-value |
| Yes                                    | <i>Ref.</i>       |         | <i>Ref.</i>          |         |
| No                                     | 1.83 (1.44, 2.33) | <0.001  | 1.59 (1.23, 2.06)    | <0.001  |
| <b>Distance learning</b>               |                   |         |                      |         |
| Yes                                    | <i>Ref.</i>       |         | <i>Ref.</i>          |         |
| No                                     | 1.56 (1.06, 2.29) | 0.03    | 1.34 (0.88, 2.03)    | 0.17    |
| <b>Change in the sleeping patterns</b> |                   |         |                      |         |
| No                                     | <i>Ref.</i>       |         | <i>Ref.</i>          |         |
| Slightly                               | 1.45 (1.01, 2.09) | 0.04    | 1.41 (0.97, 2.05)    | 0.07    |
| A lot                                  | 2.18 (1.70, 2.81) | <0.001  | 2.15 (1.65, 2.79)    | <0.001  |

\* Unemployed/ Unable to work/Student/Retired



### Loneliness and social isolation

The Cohen's kappa test between the direct and indirect measures of loneliness (UCLATIS and DMOL) suggested lack of agreement ( $\kappa = -0.34$ ) and therefore it was deemed important to explore the two scores separately. On the UCLATIS which collected was an indirect measure of loneliness, forty six percent (46.3%) of respondents felt they lacked companionship, whereas 52.4% reported having feelings of being left out, and 58% reported feeling isolated from others (**Table 1; Supplementary table**). More than half (58.9%) reported they felt lonely often or most of the time on the direct measure (DMOL). Parents reported that 58.5%, 71.0% and 72.2% of children felt they lacked companionship, had feelings of being left out, or feeling isolated from others in that same order, whereas 46.9% showed signs of feeling lonely often or most of the time on DMOL. Overall, 43.3% of respondents confirmed that their children were experiencing feelings of social isolation. More than two thirds (68.8%) felt that video calls where their child could see their teacher could help reduce feelings of social isolation, whereas 60.6% felt this could reduce feelings of loneliness. Overall, 43.9% and 33.0% felt that the lockdown and school closures respectively had caused them and their child to feel significantly more depressed (**Supplementary table**).

### UCLA three-item Loneliness Score (UCLATIS)

The multivariable ordinal logistic model suggested that the main factors associated with significantly higher odds of having a higher level of UCLATIS (the indirect measure of loneliness) were female gender of the respondent, having a child with special needs, lack of a dedicated space, a change in the child's sleeping patterns, and having low or medium physical activity during the lockdown (**table 2**). The univariably significant association of age, level of schooling (primary or secondary education) and access to technology with UCLATIS were attenuated and became non-significant in the multivariable model. Compared to male respondents, females were 82% more likely to have a higher score on UCLATIS. Parents of children who had special needs, and those who lacked a dedicated space to study had 44.0% and 33% higher odds of scoring higher on UCLATIS respectively. Parents with a low or medium level of physical activity had 53% and 45% higher odds of reporting a higher UCLATIS respectively compared to respondents who had high levels of physical activity during lockdown (**table 2**). Households who reported a disruption in the sleeping pattern of their children were 90% more likely to report a higher UCLATIS.

### Direct Measure of Loneliness (DMOL)

The factors associated with higher DMOL (the direct measure) were gender, employment status, physical activity level, household size, having children with special needs, having dedicated space to study and changes in sleeping patterns during the lockdown (**table 3**). In particular, female respondents and those who were unemployed were 52.0% and 70.0% more likely to report a higher DMOL in that same order. Respondents with low or medium levels of physical activity during the lockdown had a 53% increase in the odds of scoring a higher DMOL. Having a child with special needs increased the odds of scoring higher on DMOL by 45%, whereas single parent families and those whose children changed their sleeping patterns had 2.1-fold higher odds of scoring a higher DMOL.

Households who reported a lack of a dedicated space to study scored 59.0% higher on DMOL (**table 3**). The associations of other parent and child characteristics that

1  
2  
3 were significantly associated in the univariate analysis with a DMOL (age, education,  
4 level of schooling, access to technology and distance learning) were attenuated and  
5 became nonsignificant in the multivariable model.  
6  
7

### 8 **General perceptions about lockdown, school closures, cancellation of exams** 9 **and student preparedness for next academic year**

10 Two thirds of respondents (66.2%) said they were indifferent that end-of-year exams  
11 were being cancelled, compared to 10.8% who were happy, and 23.0% who said they  
12 were unhappy with this decision. Parents felt that only 30% of children preferred  
13 exams to be online as opposed to face-to-face. Fifty six percent of parents of  
14 secondary education children felt that their child would not be adequately prepared to  
15 sit exams if they were to be taken online. Twenty one percent reported they would be  
16 unhappy or very unhappy to send their child back to school should the lockdown be  
17 lifted and schools re-open again before the end of the academic year 2019/2020.  
18  
19  
20  
21  
22

## 23 **DISCUSSION**

24 We collected data for 6 weeks during the first 100 days of lockdown in the UK and  
25 found that female gender, lower levels of physical activity, parenting a child with  
26 special needs, lower levels of education, unemployment, reduced access to  
27 technology, not having a dedicated space where the child can study and the disruption  
28 of the child's sleep patterns during the lockdown are the main factors associated with  
29 a significantly higher odds of parents reporting feelings of loneliness.  
30  
31  
32

33 Our findings are consistent with the results of other studies (54, 55) and reviews (56,  
34 57) including those that tracked the mental health of adults, children and young people  
35 aged 4-16 years throughout the COVID-19 crisis and showed that parents reported an  
36 increase in their child's emotional, behavioural, and restless/attentional difficulties (21,  
37 58). It also corroborates existing data which shows that access to personal  
38 computers, smartphones and tablets varies widely in relation to income levels, with  
39 private schools being significantly more likely to provide children with adequate  
40 equipment including laptops and tablets (7). It is unsurprising that appropriate access  
41 to technology has direct implications on the efficiency of online schooling since remote  
42 learning relies on digital access and electronic devices that the child can use at home  
43 (59).  
44  
45  
46

47 Another major issue with online provision and remote learning is access to a dedicated  
48 space for the child at home that will facilitate such learning. Our study highlighted a  
49 significant association between the lack of a dedicated space and increased measures  
50 of loneliness in adult respondents using both the direct and indirect measures of  
51 loneliness. The lack of a dedicated space may be a proxy-measure for lower income  
52 in families who are more likely to live in an overcrowded environment (60). The pre-  
53 existing attainment gap which loomed between the poorest and richest children  
54 showed that children from disadvantaged backgrounds were twice as likely to leave  
55 formal education without GCSEs in English and Maths compared to their peers who  
56 live in less deprived areas or whose parents have a higher total household income  
57 (61). The Education Endowment Foundation has also suggested that school closures  
58 could reverse the progress made in the last decade to narrow this gap (62) as children  
59  
60

1  
2  
3 from better-off families will have received as much as 35% more home learning than  
4 children from the poorest households (63). This raises particular concerns for parents  
5 of low-income who are less likely to be in a position to assist their children's studies  
6 with financial resources and this can play a significant role in a child's learning (64).  
7 School closures have thus shed a light on the subsequent social and economic  
8 consequences of the pandemic including a rise in inequalities and those factors that  
9 could be considered as a proxy-measure of income deprivation such as digital  
10 exclusion, reduced access to tablets and smartphones or a dedicated space where  
11 the child can study (33).  
12  
13

14  
15 A recent study established that disruption of good sleep hygiene practices could lead  
16 to a behavioural profile of social withdrawal and loneliness (65), whereas loneliness is  
17 a known independent risk factor for physical inactivity (66). This was reflected in the  
18 findings of our study which showed that both modifiable risk factors (lower physical  
19 activity levels and disruption of sleep patterns) were independently associated with  
20 higher loneliness. Pertinently, both of these personal risk factors are modifiable and  
21 could be addressed through self-care practices. For example, exercise has long been  
22 associated with better sleep, and evidence is accumulating on the efficacy of exercise  
23 as a nonpharmacologic treatment option for disturbed sleep (67). Physical activity  
24 interventions in particular have also been shown to reduce loneliness and improve  
25 psychological wellbeing (68, 69).  
26  
27

28  
29 Social interaction and physical activity are also known key factors in promoting a  
30 healthy state of physical and mental wellbeing (70-72), but the unprecedented social  
31 distancing and lockdown measures have forced the vast majority of the UK population  
32 to stay at home for long periods of time. This significantly limited routine opportunities  
33 for social interactions with peers, while the closure of schools, gyms and some parks  
34 and play areas significantly reduced physical activity levels, including those of parents  
35 of school-age children since this group remains largely understudied. Many  
36 households were also faced with various issues including concern over job security  
37 coupled to the increased need to supervise their children's learning and homework  
38 when one or both parents are required to work from home. Our study showed that  
39 these factors are likely to adversely affect the mental health of individuals, and in  
40 particular by increasing the prevalence of social isolation and loneliness in  
41 households.  
42  
43

44  
45 Our UK study illustrated an increasing trend in the prevalence of social isolation and  
46 loneliness in parents of school-age children during the lockdown as was evidenced  
47 among emergency workers and other the quarantined populations (73, 74). However,  
48 this is the first study that investigated the level of loneliness in a population of parents  
49 with school-age children in the UK using both a direct and an indirect measure of  
50 loneliness.  
51

52  
53 The findings of this study may be used to direct interventions aimed at reducing  
54 feelings of social isolation and loneliness and to promote good mental health of  
55 parents with school-age children. COVID-19 lockdown can be deemed as a period of  
56 crisis that has dramatically affected the dynamics of households with school-age  
57 children. It is very important to look into the needs of this population during the  
58 lockdown as studies have shown that crises, quarantining and restrictions among  
59 school-age children have both short and long-term effect on their mental health which  
60

1  
2  
3 may affect the mental health of their parents(75)(76). Future studies should investigate  
4 the effect of remote education on the mental health of children taking into account the  
5 findings of Martin et. al who found that more than two hours of daily screen exposure  
6 can negatively affect the mental health of young children (77).  
7

8  
9 The prevailing assumption that a resurgence of COVID-19 cases is expected in the  
10 winter months shortly after schools re-open in September has led to the development  
11 of a range of preparedness and risk mitigation strategies (78). Recent modelling  
12 studies predict that school closures alone would only prevent 2–4% of deaths, which  
13 is significantly less than other social distancing interventions (79). Thus, whereas  
14 school closures present an apparently logical method of reducing virus transmission  
15 as evidenced from previous influenza outbreaks, they pose a dilemma for policy  
16 makers seeking measures to protect populations (79). This is reflected in the findings  
17 of our study which showed that one in five respondents may be unwilling to send their  
18 child back to school should schools re-open again for this academic year. Because  
19 school closures have a significant impact on public mental health and wellbeing (20)  
20 and may exacerbate inequalities (62, 63), this should be taken into account when  
21 considering future risk mitigation strategies to minimise virus transmission in the  
22 community and educational settings.  
23  
24

25  
26 The principal limitation of our study was the lack of follow-up, and not recording  
27 information about household income and demographic and lifestyle factors such as  
28 nutrition, smoking, use of alcohol and recreational drugs which may have enabled a  
29 fuller exploration of the factors that could influence the primary outcome measures  
30 examined. Further, the demographic profile of study participants largely consisted of  
31 white and employed female parents implying that this cross-section may not be  
32 representative of the wider UK parent population. We also acknowledged that since  
33 this was an online survey, we may have excluded parents with little or no digital  
34 access. These limitations restrict the generalisability of our findings to the wider  
35 population of parents across the UK. In spite of these limitations, our findings echo the  
36 results of other studies which show that lockdown measures are negatively impacting  
37 the public mental health of individuals across all age groups and may be significantly  
38 increasing the prevalence of social isolation and loneliness (18-20).  
39  
40

41  
42 Parents of school-age children remain an understudied population, especially in that  
43 they are raising the “next generation” of young adults. The mental health of parents  
44 during the lockdown is of major importance because it can significantly impact the  
45 psycho-social development and mental health of their children. The extraordinary  
46 measures introduced to control the COVID-19 pandemic have exacerbated pre-  
47 existing inequalities within society (80). When coupled with social distancing  
48 measures, the school closures have negatively impacted the mental health of school  
49 children and their parents and increased the prevalence of social isolation and  
50 loneliness in the community setting.  
51  
52

### 53 **Conclusions**

54 School closures and social distancing measures implemented during the first 100 days  
55 of the COVID-19 lockdown significantly impacted the daily routines of many people  
56 and influenced various aspects of government policy. Policy prescriptions and public  
57 health messaging should promote the adoption of good health-seeking self-care  
58 behaviours such as increased levels of physical activity and the maintenance of good  
59  
60

1  
2  
3 sleep hygiene practices to help prevent or reduce the risk of social isolation and  
4 loneliness, and this applies in particular where there is a single parent. Policy makers  
5 need to balance the impact of school closures on children and their families, and any  
6 future risk mitigation strategies should ideally not be a further disadvantage to the most  
7 vulnerable groups in society.  
8  
9

---

10  
11 **Acknowledgements:** The authors thank Mr David Collins (Head Teacher) and the  
12 Governing Board of Brackenbury Primary School for disseminating the survey  
13

14  
15 **Author Contributors:** All authors provided substantial contributions to the conception  
16 (AEO, CVH, HM), design (AEO, EB, CVH), acquisition (IW, AA, ER), and interpretation  
17 (EB, IW, HM, AM) of study data and approved the final version of the paper. AEO took  
18 the lead in planning the study with support from co-authors. EB carried out the data  
19 analysis with support from AA. AEO is the guarantor.  
20

### 21 **Data sharing statement**

22 No additional data are available  
23

24  
25 **Funding:** No funding was received. Austen El-Osta & Azeem Majeed are supported  
26 by the National Institute for Health Research (NIHR) Applied Research Collaboration  
27 (ARC) North West London. The views expressed are those of the authors and not  
28 necessarily those of the NHS or the NIHR or the Department of Health and Social  
29 Care  
30

31 **Competing interests:** None  
32

33  
34 **Twitter:** Follow Austen El-Osta at @austenelosta, and Imperial College London Self-  
35 Care Academic Research Unit (SCARU) at @ImperialSCARU  
36

---

## 37 **REFERENCES**

- 38 1. UNESCO. COVID-19 Educational Disruption and Response 2020 [Available from:  
39 <https://en.unesco.org/covid19/educationresponse>.  
40
- 41 2. Cambridge Assessment International Education. Update from Cambridge International on  
42 May/June 2020 exams 2020 [Available from: [https://www.cambridgeinternational.org/news/news-  
44 details/view/update-from-cambridge-international-on-may-june-2020-exams-20200323/](https://www.cambridgeinternational.org/news/news-<br/>43 details/view/update-from-cambridge-international-on-may-june-2020-exams-20200323/).  
45
- 46 3. International Baccalaureate. May 2020 examinations will no longer be held. 2020.  
47
- 48 4. Unicef. Children In Lockdown: What Coronavirus Means For UK Children. 2020.  
49
- 50 5. The Telegraph. Two million people lose their jobs in record plunge 2020 [Available from:  
51 <https://www.telegraph.co.uk/business/2020/04/08/two-million-people-lose-jobs-record-plunge/>.  
52
- 53 6. Ipsos MORI. Public perceptions of health and social care in light of COVID-19. The Health  
54 Foundation; 2020.
- 55 7. Carl Cullinane RM. COVID-19 and Social Mobility Impact Brief #1: School Shutdown. The Sutton  
56 Trust: The Sutton Trust; 2020.
- 57 8. Montacute R. Social Mobility and COVID-19. The Sutton Trust; 2020.
- 58 9. BBC News. Coronavirus: Further delays to children's food vouchers 2020 [Available from:  
59 <https://www.bbc.co.uk/news/education-52283067>.  
60
- 60 10. National Institute for Health and Care Excellence. NICE impact children and young people's  
healthcare 2020 [Available from: <https://www.nice.org.uk/about/what-we-do/into->



[practice/measuring-the-use-of-nice-guidance/impact-of-our-guidance/niceimpact-children-and-young-peoples-healthcare.](#)

11. Goldenberg L-MMaG. Education in times of crisis: The potential implications of school closures for teachers and students. Chartered College of Teaching. 2020.
12. YoungMinds. Coronavirus: Impact on Young People with Mental Health Needs. 2020.
13. Jones WH, Freemon JE, Goswick RA. The persistence of loneliness: Self and other determinants1. *Journal of Personality*. 1981;49(1):27-48.
14. Jones WH, Sansone C, Helm B. Loneliness and Interpersonal Judgments. *Personality and Social Psychology Bulletin*. 1983;9(3):437-41.
15. Qualter P, Brown SL, Munn P, Rotenberg KJ. Childhood loneliness as a predictor of adolescent depressive symptoms: an 8-year longitudinal study. *European Child & Adolescent Psychiatry*. 2010;19(6):493-501.
16. Schinka KC, Van Dulmen MH, Bossarte R, Swahn M. Association between loneliness and suicidality during middle childhood and adolescence: longitudinal effects and the role of demographic characteristics. *J Psychol*. 2012;146(1-2):105-18.
17. Vanhalst J, Klimstra TA, Luyckx K, Scholte RH, Engels RC, Goossens L. The interplay of loneliness and depressive symptoms across adolescence: exploring the role of personality traits. *J Youth Adolesc*. 2012;41(6):776-87.
18. WHO. Mental health and psychological resilience during the COVID-19 pandemic. 2020.
19. Louis Allwood AB. Covid-19: understanding inequalities in mental health during the pandemic. Centre for Mental Health,; 2020.
20. Oxford Uo. Co-Space Study: Supporting Parents, Adolescents and Children during Epidemics. 2020.
21. Hossain MM, Tasnim S, Sultana A, Faizah F, Mazumder H, Zou L, et al. Epidemiology of mental health problems in COVID-19: a review. *F1000Res*. 2020;9:636.
22. Rico-Urbe LA, Caballero FF, Martin-Maria N, Cabello M, Ayuso-Mateos JL, Miret M. Association of loneliness with all-cause mortality: A meta-analysis. *PLoS One*. 2018;13(1):e0190033.
23. Green BH, Copeland JR, Dewey ME, Sharma V, Saunders PA, Davidson IA, et al. Risk factors for depression in elderly people: a prospective study. *Acta Psychiatr Scand*. 1992;86(3):213-7.
24. Prince MJ, Harwood RH, Blizard RA, Thomas A, Mann AH. Social support deficits, loneliness and life events as risk factors for depression in old age. The Gospel Oak Project VI. *Psychol Med*. 1997;27(2):323-32.
25. Anderson CA, Harvey RJ. Brief report: Discriminating between problems in living: An examination of measures of depression, loneliness, shyness, and social anxiety. *Journal of Social and Clinical Psychology*. 1988;6(3-4):482-91.
26. Heinrich LM, Gullone E. The clinical significance of loneliness: A literature review. *Clinical psychology review*. 2006;26(6):695-718.
27. Bancroft J, Skrimshire A, Simkin S. The reasons people give for taking overdoses. *The British Journal of Psychiatry*. 1976;128(6):538-48.
28. Sorkin D, Rook KS, Lu JL. Loneliness, lack of emotional support, lack of companionship, and the likelihood of having a heart condition in an elderly sample. *Annals of Behavioral Medicine*. 2002;24(4):290-8.
29. Xia N, Li H. Loneliness, Social Isolation, and Cardiovascular Health. *Antioxid Redox Signal*. 2018;28(9):837-51.
30. Fox CM, Harper AP, Hyner GC, Lyle RM. Loneliness, emotional repression, marital quality, and major life events in women who develop breast cancer. *Journal of community health*. 1994;19(6):467-82.
31. Cohen-Mansfield J, Hazan H, Lerman Y, Shalom V. Correlates and predictors of loneliness in older-adults: a review of quantitative results informed by qualitative insights. *Int Psychogeriatr*. 2016;28(4):557-76.

- 1
  - 2
  - 3
  - 4
  - 5
  - 6
  - 7
  - 8
  - 9
  - 10
  - 11
  - 12
  - 13
  - 14
  - 15
  - 16
  - 17
  - 18
  - 19
  - 20
  - 21
  - 22
  - 23
  - 24
  - 25
  - 26
  - 27
  - 28
  - 29
  - 30
  - 31
  - 32
  - 33
  - 34
  - 35
  - 36
  - 37
  - 38
  - 39
  - 40
  - 41
  - 42
  - 43
  - 44
  - 45
  - 46
  - 47
  - 48
  - 49
  - 50
  - 51
  - 52
  - 53
  - 54
  - 55
  - 56
  - 57
  - 58
  - 59
  - 60
32. Wei M, Russell DW, Zakalik RA. Adult Attachment, Social Self-Efficacy, Self-Disclosure, Loneliness, and Subsequent Depression for Freshman College Students: A Longitudinal Study. *Journal of Counseling Psychology*. 2005;52(4):602-14.
33. Loades ME, Chatburn E, Higson-Sweeney N, Reynolds S, Shafran R, Brigden A, et al. Rapid Systematic Review: The Impact of Social Isolation and Loneliness on the Mental Health of Children and Adolescents in the Context of COVID-19. *J Am Acad Child Adolesc Psychiatry*. 2020;S0890-8567(20)30337-3.
34. Perlman D, Peplau LA. Toward a social psychology of loneliness. *Personal relationships*. 1981;3:31-56.
35. Malcolm M, Frost H, Cowie J. Loneliness and social isolation causal association with health-related lifestyle risk in older adults: a systematic review and meta-analysis protocol. *Syst Rev*. 2019;8(1):48-.
36. Office for National Statistics. Loneliness - What characteristics and circumstances are associated with feeling lonely? United Kingdom: Office for National Statistics; 2018 [Available from: <https://www.ons.gov.uk/peoplepopulationandcommunity/wellbeing/articles/lonelinesswhatcharacteristicsandcircumstancesareassociatedwithfeelinglonely/2018-04-10>].
37. Iparraguirre J. Predicting the prevalence of loneliness at older ages London, United Kingdom: Age UK; 2016 [Available from: [https://www.ageuk.org.uk/globalassets/age-uk/documents/reports-and-publications/reports-and-briefings/health--wellbeing/predicting\\_the\\_prevalence\\_of\\_loneliness\\_at\\_older\\_ages.pdf](https://www.ageuk.org.uk/globalassets/age-uk/documents/reports-and-publications/reports-and-briefings/health--wellbeing/predicting_the_prevalence_of_loneliness_at_older_ages.pdf)].
38. Valtorta NK, Kanaan M, Gilbody S, Hanratty B. Loneliness, social isolation and social relationships: what are we measuring? A novel framework for classifying and comparing tools. *BMJ Open*. 2016;6(4):e010799.
39. Office for National Statistics. Recommended national indicators of loneliness United Kingdom: Office for National Statistics; 2018 [Available from: [https://www.ons.gov.uk/peoplepopulationandcommunity/wellbeing/compendium/nationalmeasurements/loneliness/2018/recommendednationalindicatorsof\\_loneliness](https://www.ons.gov.uk/peoplepopulationandcommunity/wellbeing/compendium/nationalmeasurements/loneliness/2018/recommendednationalindicatorsof_loneliness)].
40. Pang HB, M ; Gnani, S; Majeed, A; El-Osta, A. Leveraging Community Assets to Tackle Social Isolation and Loneliness. *Imperial College London Primary Care Blog*. 2020.
41. O'Rourke HM, Collins L, Sidani S. Interventions to address social connectedness and loneliness for older adults: a scoping review. *BMC Geriatr*. 2018;18(1):214.
42. Gardiner C, Geldenhuys G, Gott M. Interventions to reduce social isolation and loneliness among older people: an integrative review. *Health Soc Care Community*. 2018;26(2):147-57.
43. Jopling K. Promising approaches to reducing loneliness and isolation in later life United Kingdom: Age UK; 2015 [Available from: <https://www.campaigntoendloneliness.org/wp-content/uploads/Promising-approaches-to-reducing-loneliness-and-isolation-in-later-life.pdf>].
44. Merchant RM, Lurie N. Social media and emergency preparedness in response to novel coronavirus. *JAMA*. 2020.
45. Bao Y, Sun Y, Meng S, Shi J, Lu L. 2019-nCoV epidemic: address mental health care to empower society. *Lancet*. 2020;395(10224):e37-e8.
46. Ho CS, Chee CY, Ho RC. Mental Health Strategies to Combat the Psychological Impact of COVID-19 Beyond Paranoia and Panic. *Ann Acad Med Singapore*. 2020;49(3):155-60.
47. Margalit M. Lonely children and adolescents: Self perceptions, social exclusion and Hope2010.
48. Zhai Y, Du X. Mental health care for international Chinese students affected by the COVID-19 outbreak. *Lancet Psychiatry*. 2020;7(4):e22.
49. Armitage R, Nellums LB. COVID-19 and the consequences of isolating the elderly. *Lancet Public Health*. 2020;5(5):e256-e.
50. Hughes ME, Waite LJ, Hawkey LC, Cacioppo JT. A Short Scale for Measuring Loneliness in Large Surveys: Results From Two Population-Based Studies. *Research on Aging*. 2004;26(6):655-72.
51. Office for National Statistics. Recommended national indicators of loneliness 2020 [Available from:

1  
2  
3 <https://www.ons.gov.uk/peoplepopulationandcommunity/wellbeing/compendium/nationalmeasure-mentofloneliness/2018/recommendednationalindicatorsofloneliness#:~:text=Direct%20measure,ever%E2%80%9D%20or%20%22Never%22>.

4  
5  
6  
7 52. Jakobsen JC, Gluud C, Winkel P, Lange T, Wetterslev J. The thresholds for statistical and clinical significance - a five-step procedure for evaluation of intervention effects in randomised clinical trials. *BMC Med Res Methodol*. 2014;14:34.

8  
9  
10 53. Jakobsen JC, Wetterslev J, Winkel P, Lange T, Gluud C. Thresholds for statistical and clinical significance in systematic reviews with meta-analytic methods. *BMC Med Res Methodol*. 2014;14:120.

11  
12 54. The Lancet Infectious D. The intersection of COVID-19 and mental health. *The Lancet Infectious Diseases*. 2020;20(11):1217.

13  
14 55. Pfefferbaum B, North CS. Mental Health and the Covid-19 Pandemic. *N Engl J Med*. 2020;383(6):510-2.

15  
16 56. Vindegaard N, Benros ME. COVID-19 pandemic and mental health consequences: Systematic review of the current evidence. *Brain Behav Immun*. 2020;89:531-42.

17  
18 57. Torales J, O'Higgins M, Castaldelli-Maia JM, Ventriglio A. The outbreak of COVID-19 coronavirus and its impact on global mental health. *Int J Soc Psychiatry*. 2020;66(4):317-20.

19  
20 58. Oxford Uo. Children show increase in mental health difficulties over COVID-19 lockdown. 2020.

21  
22 59. Lee J. Mental health effects of school closures during COVID-19. *Lancet Child Adolesc Health*. 2020;4(6):421.

23  
24 60. Rahman LJF. Lockdown livingHousing quality across the generations. Resolution Foundation. 2020.

25  
26 61. Education Endowment Foundation. The Attainment Gap. 2017.

27  
28 62. Foundation EE. Impact of school closures on the attainment gap. 2020.

29  
30 63. Studies IFF. Institute for Fiscal Studies. Poverty, inequality and living standards 2013.

31  
32 64. Rebecca Montacute CC. How parents use financial and cultural resources to boost their children's chances of success. The Sutton Trust; 2018.

33  
34 65. Ben Simon E, Walker MP. Sleep loss causes social withdrawal and loneliness. *Nature Communications*. 2018;9(1):3146.

35  
36 66. Hawkley LC, Thisted RA, Cacioppo JT. Loneliness predicts reduced physical activity: cross-sectional & longitudinal analyses. *Health Psychol*. 2009;28(3):354-63.

37  
38 67. Kline CE. The bidirectional relationship between exercise and sleep: Implications for exercise adherence and sleep improvement. *Am J Lifestyle Med*. 2014;8(6):375-9.

39  
40 68. Shvedko AV, Thompson JL, Greig CA, Whittaker AC. Physical Activity Intervention for Loneliness (PAIL) in community-dwelling older adults: protocol for a feasibility study. *Pilot Feasibility Stud*. 2018;4:187.

41  
42 69. Pels F, Kleinert J. Loneliness and physical activity: A systematic review. *International Review of Sport and Exercise Psychology*. 2016;9(1):231-60.

43  
44 70. Harandi TF, Taghinasab MM, Nayeri TD. The correlation of social support with mental health: A meta-analysis. *Electron Physician*. 2017;9(9):5212-22.

45  
46 71. Elbe A-M, Lyhne SN, Madsen EE, Krusturup P. Is regular physical activity a key to mental health? Commentary on "Association between physical exercise and mental health in 1.2 million individuals in the USA between 2011 and 2015: A cross-sectional study", by Chekroud et al., published in *Lancet Psychiatry*. *J Sport Health Sci*. 2019;8(1):6-7.

47  
48 72. Tough H, Siegrist J, Fekete C. Social relationships, mental health and wellbeing in physical disability: a systematic review. *BMC Public Health*. 2017;17(1):414.

49  
50 73. Torales J, O'Higgins M, Castaldelli-Maia JM, Ventriglio A. The outbreak of COVID-19 coronavirus and its impact on global mental health. *International Journal of Social Psychiatry*.0(0):0020764020915212.



- 1  
2  
3 74. Lima CKT, Carvalho PMdM, Lima IdAAS, Nunes JVAdO, Saraiva JS, de Souza RI, et al. The  
4 emotional impact of Coronavirus 2019-nCoV (new Coronavirus disease). *Psychiatry Res.*  
5 2020;287:112915-.
- 6 75. Liu JJ, Bao Y, Huang X, Shi J, Lu L. Mental health considerations for children quarantined  
7 because of COVID-19. *Lancet Child Adolesc Health.* 2020;4(5):347-9.
- 8 76. Twenge JM, Campbell WK. Associations between screen time and lower psychological well-  
9 being among children and adolescents: Evidence from a population-based study. *Prev Med Rep.*  
10 2018;12:271-83.
- 11 77. Martin K, editor *Electronic Overload: The Impact of Excessive Screen Use on Child and*  
12 *Adolescent Health and Wellbeing*2011.
- 13 78. Sciences TAoM. Preparing for a challenging winter 2020/21. 2020.
- 14 79. Viner RM, Russell SJ, Croker H, Packer J, Ward J, Stansfield C, et al. School closure and  
15 management practices during coronavirus outbreaks including COVID-19: a rapid systematic review.  
16 *The Lancet Child & Adolescent Health.* 2020;4(5):397-404.
- 17 80. Coronini-Cronberg S, John Maile E, Majeed A. Health inequalities: the hidden cost of COVID-  
18 19 in NHS hospital trusts? *J R Soc Med.* 2020;113(5):179-84.
- 20  
21  
22  
23  
24  
25  
26  
27  
28  
29  
30  
31  
32  
33  
34  
35  
36  
37  
38  
39  
40  
41  
42  
43  
44  
45  
46  
47  
48  
49  
50  
51  
52  
53  
54  
55  
56  
57  
58  
59  
60

**Supplementary table 1: Prevalence of low, moderate and high levels of loneliness (UCLATILS and DMOL) in relation to respondent characteristics**

|                                                     | Total |         | UCL three-item loneliness scale (UCLATILS) |                   |               |         |             |                   | ONS Direct measure of loneliness (DMOL) |         |        |     |        |     |        |
|-----------------------------------------------------|-------|---------|--------------------------------------------|-------------------|---------------|---------|-------------|-------------------|-----------------------------------------|---------|--------|-----|--------|-----|--------|
|                                                     | N     | (%)     | No<br>n (%)                                | Moderate<br>n (%) | High<br>n (%) | p-value | No<br>n (%) | Moderate<br>n (%) | High<br>n (%)                           | p value |        |     |        |     |        |
| <b>PARENT CHARACTERISTICS</b>                       |       |         |                                            |                   |               |         |             |                   |                                         |         |        |     |        |     |        |
| <b>How many children do you have</b>                |       |         |                                            |                   |               | 0.35    |             |                   |                                         |         |        |     | 0.24   |     |        |
| 1                                                   | 251   | (100.0) | 80                                         | (31.9)            | 67            | (26.7)  | 104         | (41.4)            |                                         | 126     | (50.2) | 89  | (35.5) | 36  | (14.3) |
| 2                                                   | 649   | (100.0) | 222                                        | (34.2)            | 184           | (28.4)  | 243         | (37.4)            |                                         | 351     | (54.7) | 222 | (34.6) | 69  | (10.7) |
| 3                                                   | 244   | (100.0) | 86                                         | (35.2)            | 70            | (28.7)  | 88          | (36.1)            |                                         | 130     | (54.2) | 73  | (30.4) | 37  | (15.4) |
| 4                                                   | 50    | (100.0) | 14                                         | (28.0)            | 11            | (22.0)  | 25          | (50.0)            |                                         | 23      | (46.9) | 18  | (36.7) | 8   | (16.3) |
| 5+                                                  | 18    | (100.0) | 5                                          | (27.8)            | 2             | (11.1)  | 11          | (61.1)            |                                         | 7       | (38.9) | 6   | (33.3) | 5   | (27.8) |
| <b>Does partner work?</b>                           |       |         |                                            |                   |               | 0.09    |             |                   |                                         |         |        |     |        |     | <0.001 |
| Yes                                                 | 995   | (100.0) | 348                                        | (35.0)            | 284           | (28.5)  | 363         | (36.5)            |                                         | 560     | (56.9) | 318 | (32.3) | 107 | (10.9) |
| No                                                  | 146   | (100.0) | 43                                         | (29.5)            | 36            | (24.7)  | 67          | (45.9)            |                                         | 56      | (38.9) | 56  | (38.9) | 32  | (22.2) |
| <b>Key worker</b>                                   |       |         |                                            |                   |               | 0.07    |             |                   |                                         |         |        |     |        |     | 0.03   |
| Yes                                                 | 213   | (100.0) | 77                                         | (36.2)            | 65            | (30.5)  | 71          | (33.3)            |                                         | 121     | (57.6) | 69  | (32.9) | 20  | (9.5)  |
| No                                                  | 394   | (100.0) | 125                                        | (31.7)            | 100           | (25.4)  | 169         | (42.9)            |                                         | 201     | (51.1) | 124 | (31.6) | 68  | (17.3) |
| <b>Physical activity levels before the lockdown</b> |       |         |                                            |                   |               | 0.08    |             |                   |                                         |         |        |     |        |     | 0.02   |
| Low                                                 | 63    | (100.0) | 27                                         | (42.9)            | 13            | (20.6)  | 23          | (36.5)            |                                         | 41      | (66.1) | 14  | (22.6) | 7   | (11.3) |
| Medium                                              | 626   | (100.0) | 215                                        | (34.4)            | 186           | (29.7)  | 225         | (35.9)            |                                         | 347     | (56.2) | 196 | (31.7) | 75  | (12.1) |
| High                                                | 505   | (100.0) | 161                                        | (31.9)            | 129           | 25.5)   | 215         | (42.6)            |                                         | 241     | (48.0) | 192 | (38.3) | 69  | (13.8) |
| <b>Videocall reduces SI</b>                         |       |         |                                            |                   |               | <0.001  |             |                   |                                         |         |        |     |        |     | 0.02   |
| Yes                                                 | 825   | (100.0) | 245                                        | (29.7)            | 238           | (28.9)  | 342         | (41.5)            |                                         | 411     | (50.2) | 296 | (36.2) | 111 | (13.6) |
| No                                                  | 375   | (100.0) | 159                                        | (42.4)            | 91            | (24.3)  | 125         | (33.3)            |                                         | 219     | (59.0) | 110 | (29.7) | 42  | (11.3) |
| <b>Videocall reduces loneliness</b>                 |       |         |                                            |                   |               | <0.001  |             |                   |                                         |         |        |     |        |     | <0.001 |
| Yes                                                 | 712   | (100.0) | 194                                        | (27.3)            | 204           | (28.7)  | 314         | (44.1)            |                                         | 339     | (48.0) | 266 | (37.6) | 102 | (14.4) |
| No                                                  | 464   | (100.0) | 201                                        | (43.3)            | 121           | (26.1)  | 142         | 30.6)             |                                         | 285     | (62.0) | 128 | (27.8) | 47  | (10.2) |
| <b>Depression due to lockdown</b>                   |       |         |                                            |                   |               | <0.001  |             |                   |                                         |         |        |     |        |     | <0.001 |
| Yes                                                 | 523   | (100.0) | 82                                         | (15.7)            | 124           | (23.7)  | 317         | (60.6)            |                                         | 151     | (29.0) | 236 | (45.3) | 134 | (25.7) |

1  
2  
3  
4  
5  
6  
7  
8  
9  
10  
11  
12  
13  
14  
15  
16  
17  
18  
19  
20  
21  
22  
23  
24  
25  
26  
27  
28  
29  
30  
31  
32  
33  
34  
35  
36  
37  
38  
39  
40  
41  
42  
43  
44  
45  
46

|                                               | Total |         | UCL three-item loneliness scale (UCLATILS) |        |          |        |      |        | ONS Direct measure of loneliness (DMOL) |     |          |        |      |        |         |        |        |
|-----------------------------------------------|-------|---------|--------------------------------------------|--------|----------|--------|------|--------|-----------------------------------------|-----|----------|--------|------|--------|---------|--------|--------|
|                                               | N     | (%)     | No                                         |        | Moderate |        | High |        | No                                      |     | Moderate |        | High |        | p-value |        |        |
|                                               |       |         | n                                          | (%)    | n        | (%)    | n    | (%)    | n                                       | (%) | n        | (%)    | n    | (%)    |         |        |        |
| No                                            | 672   | (100.0) | 316                                        | (47.0) | 207      | (30.8) | 149  | (22.2) |                                         |     | 477      | (72.1) | 166  | (25.1) | 19      | (2.9)  |        |
| <b>Cancelation of the exams</b>               |       |         |                                            |        |          |        |      |        |                                         |     |          |        |      |        |         |        | 0.77   |
| Unhappy                                       | 276   | (100.0) | 89                                         | (32.3) | 77       | (27.9) | 110  | (39.9) |                                         |     | 126      | (45.8) | 104  | (37.8) | 45      | (16.4) |        |
| Neutral                                       | 793   | (100.0) | 267                                        | (33.7) | 215      | (27.1) | 311  | (39.2) |                                         |     | 429      | (54.8) | 260  | (33.2) | 94      | (12.0) |        |
| Happy                                         | 130   | (100.0) | 49                                         | (37.7) | 37       | (28.5) | 44   | (33.9) |                                         |     | 76       | (58.9) | 41   | (31.8) | 12      | (9.3)  |        |
| <b>Preference of online exams</b>             |       |         |                                            |        |          |        |      |        |                                         |     |          |        |      |        |         |        | 0.38   |
| Yes                                           | 494   | (100.0) | 158                                        | (32.0) | 140      | (28.3) | 196  | (39.7) |                                         |     | 261      | (53.3) | 164  | (33.5) | 65      | (13.3) |        |
| No                                            | 644   | (100.0) | 231                                        | (35.9) | 176      | (27.3) | 237  | (36.8) |                                         |     | 347      | (54.6) | 211  | (33.2) | 78      | (12.3) |        |
| <b>Sending child to school after lockdown</b> |       |         |                                            |        |          |        |      |        |                                         |     |          |        |      |        |         |        | 0.20   |
| Very unhappy                                  | 100   | (100.0) | 39                                         | (39.0) | 23       | (23.0) | 38   | (38.0) |                                         |     | 54       | (55.7) | 28   | (28.9) | 15      | (15.5) |        |
| Unhappy                                       | 158   | (100.0) | 59                                         | (37.3) | 48       | (30.4) | 51   | (32.3) |                                         |     | 89       | (58.2) | 48   | (31.4) | 16      | (10.5) |        |
| Neither unhappy nor happy                     | 230   | (100.0) | 86                                         | (37.4) | 64       | (27.8) | 80   | (34.8) |                                         |     | 130      | (57.0) | 69   | (30.3) | 29      | (12.7) |        |
| Happy                                         | 363   | (100.0) | 108                                        | (29.8) | 95       | (26.2) | 160  | (44.1) |                                         |     | 170      | (46.8) | 149  | (41.0) | 44      | (12.1) |        |
| Very happy                                    | 353   | (100.0) | 115                                        | (32.6) | 101      | (28.6) | 137  | (38.8) |                                         |     | 193      | (54.8) | 111  | (31.5) | 48      | (13.6) |        |
| <b>CHILD CHARACTERISTICS</b>                  |       |         |                                            |        |          |        |      |        |                                         |     |          |        |      |        |         |        |        |
| <b>Type of school</b>                         |       |         |                                            |        |          |        |      |        |                                         |     |          |        |      |        |         |        | 0.38   |
| State school                                  | 1082  | (100.0) | 356                                        | (32.9) | 302      | (27.9) | 424  | (39.2) |                                         |     | 559      | (52.2) | 366  | (34.2) | 146     | (13.6) |        |
| Private school                                | 128   | (100.0) | 50                                         | (39.1) | 32       | (25.0) | 46   | (35.9) |                                         |     | 77       | (60.6) | 41   | (32.3) | 9       | (7.1)  |        |
| <b>Private tuition</b>                        |       |         |                                            |        |          |        |      |        |                                         |     |          |        |      |        |         |        | 0.94   |
| Yes                                           | 115   | (100.0) | 40                                         | (34.8) | 32       | (27.8) | 43   | (37.4) |                                         |     | 70       | (60.9) | 37   | (32.2) | 8       | (7.0)  |        |
| No                                            | 1095  | (100.0) | 366                                        | (33.4) | 302      | (27.6) | 427  | (39.0) |                                         |     | 566      | (52.3) | 371  | (34.3) | 146     | (13.5) |        |
| <b>Time spent studying</b>                    |       |         |                                            |        |          |        |      |        |                                         |     |          |        |      |        |         |        | 0.04   |
| ≤2 hours                                      | 439   | (100.0) | 130                                        | (29.6) | 112      | (25.5) | 197  | (44.9) |                                         |     | 195      | (44.8) | 157  | (36.1) | 83      | (19.1) |        |
| 2-4 hours                                     | 365   | (100.0) | 124                                        | (34.0) | 109      | (29.9) | 132  | (36.2) |                                         |     | 202      | (55.8) | 119  | (32.9) | 41      | (11.3) |        |
| ≥4 hours                                      | 386   | (100.0) | 146                                        | (37.8) | 108      | (28.0) | 132  | (34.2) |                                         |     | 231      | (60.5) | 124  | (32.5) | 27      | (7.1)  |        |
| <b>Boredom</b>                                |       |         |                                            |        |          |        |      |        |                                         |     |          |        |      |        |         |        | <0.001 |

|                                                                  | Total |         | UCL three-item loneliness scale (UCLATILS) |        |          |        |      |        | ONS Direct measure of loneliness (DMOL) |     |        |          |        |      |        |         |
|------------------------------------------------------------------|-------|---------|--------------------------------------------|--------|----------|--------|------|--------|-----------------------------------------|-----|--------|----------|--------|------|--------|---------|
|                                                                  | N     | (%)     | No                                         |        | Moderate |        | High |        | p-value                                 | No  |        | Moderate |        | High |        | p value |
|                                                                  |       |         | n                                          | (%)    | n        | (%)    | n    | (%)    |                                         | n   | (%)    | n        | (%)    | n    | (%)    |         |
| Low                                                              | 74    | (100.0) | 40                                         | (54.1) | 16       | 21.6)  | 18   | (24.3) |                                         | 50  | (68.5) | 18       | (24.7) | 5    | (6.8)  |         |
| Medium                                                           | 396   | (100.0) | 165                                        | (41.7) | 117      | (29.5) | 114  | (28.8) |                                         | 250 | (63.5) | 116      | (29.4) | 28   | (7.1)  |         |
| High                                                             | 734   | (100.0) | 200                                        | (27.2) | 199      | (27.1) | 335  | (45.6) |                                         | 334 | (45.9) | 273      | (37.6) | 120  | (16.5) |         |
| <b>Stress</b>                                                    |       |         |                                            |        |          |        |      |        | <0.001                                  |     |        |          |        |      |        | <0.001  |
| Low                                                              | 213   | (100.0) | 115                                        | (54.0) | 54       | (25.4) | 44   | (20.7) |                                         | 159 | (75.7) | 41       | (19.5) | 10   | (4.8)  |         |
| Medium                                                           | 531   | (100.0) | 190                                        | (35.8) | 158      | (29.8) | 183  | (34.5) |                                         | 308 | (58.6) | 177      | (33.7) | 41   | (7.8)  |         |
| High                                                             | 457   | (100.0) | 98                                         | (21.4) | 120      | (26.3) | 239  | (52.3) |                                         | 166 | (36.4) | 188      | (41.2) | 102  | (22.4) |         |
| <b>Signs of depression</b>                                       |       |         |                                            |        |          |        |      |        | <0.001                                  |     |        |          |        |      |        | <0.001  |
| Yes                                                              | 146   | (100.0) | 30                                         | (20.5) | 35       | (24.0) | 81   | (55.5) |                                         | 54  | (37.0) | 59       | (40.4) | 33   | (22.6) |         |
| No                                                               | 297   | (100.0) | 128                                        | (43.1) | 85       | (28.6) | 84   | (28.3) |                                         | 194 | (65.8) | 87       | (29.5) | 14   | (4.7)  |         |
| <b>Children complaining of feeling social isolated or lonely</b> |       |         |                                            |        |          |        |      |        | <0.001                                  |     |        |          |        |      |        | <0.001  |
| Yes                                                              | 521   | (100.0) | 85                                         | (16.3) | 137      | (26.3) | 299  | (57.4) |                                         | 170 | (32.8) | 231      | (44.6) | 117  | (22.6) |         |
| No                                                               | 685   | (100.0) | 321                                        | (46.9) | 196      | (28.6) | 168  | (24.5) |                                         | 466 | (68.9) | 175      | (25.9) | 35   | (5.2)  |         |
| <b>Physical activity levels before the lockdown</b>              |       |         |                                            |        |          |        |      |        | 0.27                                    |     |        |          |        |      |        | 0.30    |
| Low                                                              | 17    | (100.0) | 3                                          | (17.6) | 6        | (35.3) | 8    | (47.1) |                                         | 10  | (62.5) | 3        | (18.8) | 3    | (18.8) |         |
| Medium                                                           | 281   | (100.0) | 108                                        | (38.4) | 77       | (27.4) | 96   | (34.2) |                                         | 159 | (57.0) | 86       | (30.8) | 34   | (12.2) |         |
| High                                                             | 901   | (100.0) | 290                                        | (32.2) | 247      | (27.4) | 364  | (40.4) |                                         | 462 | (51.7) | 317      | (35.5) | 115  | (12.9) |         |
| <b>Physical activity levels during the lockdown</b>              |       |         |                                            |        |          |        |      |        | 0.44                                    |     |        |          |        |      |        | 0.62    |
| Low                                                              | 174   | (100.0) | 56                                         | (32.2) | 41       | (23.6) | 77   | (44.3) |                                         | 83  | (48.3) | 66       | (38.4) | 23   | (13.4) |         |
| Medium                                                           | 715   | (100.0) | 231                                        | (32.3) | 203      | (28.4) | 281  | (39.3) |                                         | 376 | (53.0) | 246      | (34.6) | 88   | (12.4) |         |
| High                                                             | 304   | (100.0) | 111                                        | (36.5) | 85       | (28.0) | 108  | (35.5) |                                         | 168 | (55.8) | 92       | (30.6) | 41   | (13.6) |         |
| <b>Readiness to undertake exams</b>                              |       |         |                                            |        |          |        |      |        | <0.001                                  |     |        |          |        |      |        | <0.001  |
| Ready                                                            | 217   | (100.0) | 83                                         | (38.2) | 51       | (23.5) | 83   | (38.2) |                                         | 285 | (46.2) | 233      | (37.8) | 99   | (16.0) |         |
| Neutral                                                          | 279   | (100.0) | 123                                        | (44.1) | 71       | (25.4) | 85   | (30.5) |                                         | 184 | (66.2) | 77       | (27.7) | 17   | (6.1)  |         |
| Unready                                                          | 627   | (100.0) | 178                                        | (28.4) | 186      | (29.7) | 263  | (41.9) |                                         | 126 | (58.3) | 65       | (30.1) | 25   | (11.6) |         |

**Appendix 1: Checklist for Reporting Results of Internet E-Surveys (CHERRIES)**

| <i>Item Category</i>                                                                 | <i>Checklist Item</i>            | <i>Page Number</i> | <i>Description</i>                                                                                                                                                                                                                                                                                                                                                                                                                                                                                                                                                                                                                                                                                                                                                                                  |
|--------------------------------------------------------------------------------------|----------------------------------|--------------------|-----------------------------------------------------------------------------------------------------------------------------------------------------------------------------------------------------------------------------------------------------------------------------------------------------------------------------------------------------------------------------------------------------------------------------------------------------------------------------------------------------------------------------------------------------------------------------------------------------------------------------------------------------------------------------------------------------------------------------------------------------------------------------------------------------|
| Design                                                                               | Study design                     | 4                  | The target population were adult (aged 18 years and over) parents and legal guardians of children who were attending primary or secondary education in the UK.                                                                                                                                                                                                                                                                                                                                                                                                                                                                                                                                                                                                                                      |
| IRB (Institutional Review Board) approval and informed consent process               | IRB approval                     | 6                  | The study was given ethical approval by the Head of Imperial College London PCPH Department, Professor Azeem Majeed, and by the Joint Research Compliance Office under the Imperial College Research Ethics Committee process (approval 20IC5978 ICREC HOD JRCO)                                                                                                                                                                                                                                                                                                                                                                                                                                                                                                                                    |
|                                                                                      | Informed consent                 | 4 and 5            | The link to the Participant Information Sheet was accessible on the eSurvey page and sent to heads of schools who were contacted. The PIS included information regarding the study such as the protection of the participants' personal data, their right to withdraw from the study at any time, the length of time of the survey, which data were stored, where and for how long, who the investigator was, and the purpose of the study. They were informed this was a voluntary survey without any monetary incentives but with offering the possibility to access the results and underlying the potential collective benefits of taking parts in terms of knowledge and policies. The first question of the survey asked participants to confirm their consent to participate in the eSurvey. |
|                                                                                      | Data protection                  | 5                  | The data collected were stored on the Imperial secure database and only the team researchers could access the eSurvey results.                                                                                                                                                                                                                                                                                                                                                                                                                                                                                                                                                                                                                                                                      |
| Development and pre-testing                                                          | Development and testing          | 4 and 5            | The study protocol and online survey were developed in collaboration with the Governing Board of Brackenbury Primary School in the London Borough of Hammersmith & Fulham. The online survey technical functionality was tested before being published.                                                                                                                                                                                                                                                                                                                                                                                                                                                                                                                                             |
| Recruitment process and description of the sample having access to the questionnaire | Open survey versus closed survey | 4                  | This was an open survey using a snowball sampling.                                                                                                                                                                                                                                                                                                                                                                                                                                                                                                                                                                                                                                                                                                                                                  |
|                                                                                      | Contact mode                     | 4                  | Part of the potentially eligible participants received an invitation email from the head teacher of schools where study information was disseminated including the Participant Information Sheet and link to the survey. The researchers' personal and professional networks were also mobilized through email and other messaging applications such as WhatsApp to respond and further disseminate the eSurvey among eligible participants.                                                                                                                                                                                                                                                                                                                                                        |
|                                                                                      | Advertising the survey           | 4                  | The study was advertised through head teachers of schools and researchers' networks                                                                                                                                                                                                                                                                                                                                                                                                                                                                                                                                                                                                                                                                                                                 |
| Survey                                                                               | Web/E-mail                       | 4                  | The survey was hosted by the Imperial College Qualtrics platform.                                                                                                                                                                                                                                                                                                                                                                                                                                                                                                                                                                                                                                                                                                                                   |

|                                                      |                                          |         |                                                                                                                                                                                                                                                                                                        |
|------------------------------------------------------|------------------------------------------|---------|--------------------------------------------------------------------------------------------------------------------------------------------------------------------------------------------------------------------------------------------------------------------------------------------------------|
| Administration                                       | Context                                  | p 10    | The Head Teacher of Brackenbury Primary School disseminated the survey to parents of that school to give parents the opportunity to reflect on an issue that is important to them given the nature of the study. This was a 'right-in-time' study earmarked for recruitment <i>during</i> the lockdown |
|                                                      | Mandatory/voluntary                      | 5       | This was a voluntary survey                                                                                                                                                                                                                                                                            |
|                                                      | Incentives                               | 4 and 5 | Participants were informed in the PIC that no monetary incentives were offered but non-monetary incentives such as the possibility to access the results and the potential collective benefits of taking parts in terms of knowledge and policies were mentioned.                                      |
|                                                      | Time/Date                                | 4       | The survey was accessible for a period of 9 weeks from 14 May 2020 to 4 July 2020.                                                                                                                                                                                                                     |
|                                                      | Randomization of items or questionnaires | -       | No randomization of items was used.                                                                                                                                                                                                                                                                    |
|                                                      | Adaptive questioning                     | -       | No adaptive questioning of items was used.                                                                                                                                                                                                                                                             |
|                                                      | Number of Items                          | 5       | The survey comprised a total of 51 questions.                                                                                                                                                                                                                                                          |
|                                                      | Number of screens (pages)                | 5       | All questions were displayed on one page and was accessible using a personal computer or smartphone.                                                                                                                                                                                                   |
|                                                      | Completeness check                       | 4       | Most items provided a non-response option such as "not applicable" or "rather not say", though not all. Selection of a response option to questions was not forced but were all fully completed. Analysis was conducted on fully completed questionnaires.                                             |
|                                                      | Review step                              | 5       | Participants could review their answers before submitting them.                                                                                                                                                                                                                                        |
| Response rates                                       | Unique site visitor                      | -       | Not applicable as response rates were not calculated.                                                                                                                                                                                                                                                  |
|                                                      | View rate                                | -       | Not applicable as response rates were not calculated.                                                                                                                                                                                                                                                  |
|                                                      | Participation rate                       | -       | Not applicable as response rates were not calculated.                                                                                                                                                                                                                                                  |
|                                                      | Completion rate                          | -       | Not applicable as response rates were not calculated.                                                                                                                                                                                                                                                  |
| Preventing multiple entries from the same individual | Cookies used                             | -       | No cookies were used.                                                                                                                                                                                                                                                                                  |
|                                                      | IP check                                 | -       | Qualtrics registered the IP address of respondents and did not allow a respondent for completing another survey from the same IP address for a period of one week.                                                                                                                                     |
|                                                      | Log file analysis                        | -       | No log files analysis.                                                                                                                                                                                                                                                                                 |
|                                                      | Registration                             | -       | No registration.                                                                                                                                                                                                                                                                                       |
| Analysis                                             | Handling of incomplete questionnaires    | -       | Only completed questionnaires were included in the final dataset.                                                                                                                                                                                                                                      |

|  |                                                     |   |                |
|--|-----------------------------------------------------|---|----------------|
|  | Questionnaires submitted with an atypical timestamp | - | Not applicable |
|  | Statistical correction                              | - | None           |

This checklist has been adapted from Eysenbach G. Improving the quality of Web surveys: the Checklist for Reporting Results of Internet E-Surveys (CHERRIES). J Med Internet Res. 2004 Sep 29;6(3):e34 [erratum in J Med Internet Res. 2012; 14(1): e8.]. Article available at <https://www.jmir.org/2004/3/e34/>; erratum available <https://www.jmir.org/2012/1/e8/>. Copyright ©Gunther Eysenbach. Originally published in the [Journal of Medical Internet Research](#), 29.9.2004 and 04.01.2012.

This is an open-access article distributed under the terms of the Creative Commons Attribution License (<https://creativecommons.org/licenses/by/2.0/>), which permits unrestricted use, distribution, and reproduction in any medium, provided the original work, first published in the Journal of Medical Internet Research, is properly cited.

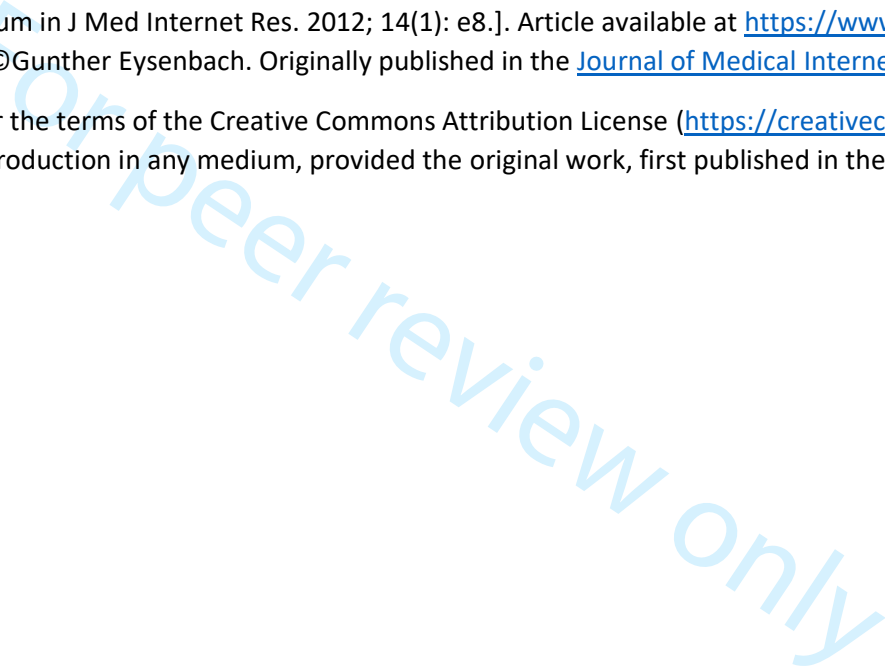



# BMJ Open

## How is the COVID-19 lockdown impacting the mental health of parents of school-age children in the United Kingdom? A cross-sectional online survey

|                                 |                                                                                                                                                                                                                                                                                                                                                                                                                                                                                                                                                                                                                                                                                                                                                                                                                                                                                                                                                                                                 |
|---------------------------------|-------------------------------------------------------------------------------------------------------------------------------------------------------------------------------------------------------------------------------------------------------------------------------------------------------------------------------------------------------------------------------------------------------------------------------------------------------------------------------------------------------------------------------------------------------------------------------------------------------------------------------------------------------------------------------------------------------------------------------------------------------------------------------------------------------------------------------------------------------------------------------------------------------------------------------------------------------------------------------------------------|
| Journal:                        | <i>BMJ Open</i>                                                                                                                                                                                                                                                                                                                                                                                                                                                                                                                                                                                                                                                                                                                                                                                                                                                                                                                                                                                 |
| Manuscript ID                   | bmjopen-2020-043397.R2                                                                                                                                                                                                                                                                                                                                                                                                                                                                                                                                                                                                                                                                                                                                                                                                                                                                                                                                                                          |
| Article Type:                   | Original research                                                                                                                                                                                                                                                                                                                                                                                                                                                                                                                                                                                                                                                                                                                                                                                                                                                                                                                                                                               |
| Date Submitted by the Author:   | 26-Apr-2021                                                                                                                                                                                                                                                                                                                                                                                                                                                                                                                                                                                                                                                                                                                                                                                                                                                                                                                                                                                     |
| Complete List of Authors:       | <p>El-Osta, Austen; Imperial College London Faculty of Medicine, Self-Care Academic Research Unit (SCARU), Department of Primary Care &amp; Public Health</p> <p>Alaa, Aos; Imperial College London Faculty of Medicine, Self-Care Academic Research Unit (SCARU), Department of Priamry Care &amp; Public Health</p> <p>Webber, Iman; Imperial College London Faculty of Medicine, Self-Care Academic Research Unit (SCARU), Department of Priamry Care &amp; Public Health</p> <p>Riboli Sasco, Eva; Imperial College London Faculty of Medicine, Self-Care Academic Research Unit (SCARU), Department of Priamry Care &amp; Public Health</p> <p>Bagkeris, Emmanouil; Imperial College London, National Heart and Lung Institute</p> <p>Millar, Helen L; The Carseview Centre, Psychiatry</p> <p>Vidal-Hall, Charlotte; Brackenbury Primary School, Chair of Governing Board</p> <p>Majeed, Azeem; Imperial College London Faculty of Medicine, Department of Primary Care Public Health</p> |
| <b>Primary Subject Heading</b>: | Public health                                                                                                                                                                                                                                                                                                                                                                                                                                                                                                                                                                                                                                                                                                                                                                                                                                                                                                                                                                                   |
| Secondary Subject Heading:      | Health policy, Epidemiology, Qualitative research                                                                                                                                                                                                                                                                                                                                                                                                                                                                                                                                                                                                                                                                                                                                                                                                                                                                                                                                               |
| Keywords:                       | PUBLIC HEALTH, MENTAL HEALTH, EPIDEMIOLOGY                                                                                                                                                                                                                                                                                                                                                                                                                                                                                                                                                                                                                                                                                                                                                                                                                                                                                                                                                      |
|                                 |                                                                                                                                                                                                                                                                                                                                                                                                                                                                                                                                                                                                                                                                                                                                                                                                                                                                                                                                                                                                 |

SCHOLARONE™  
Manuscripts



I, the Submitting Author has the right to grant and does grant on behalf of all authors of the Work (as defined in the below author licence), an exclusive licence and/or a non-exclusive licence for contributions from authors who are: i) UK Crown employees; ii) where BMJ has agreed a CC-BY licence shall apply, and/or iii) in accordance with the terms applicable for US Federal Government officers or employees acting as part of their official duties; on a worldwide, perpetual, irrevocable, royalty-free basis to BMJ Publishing Group Ltd ("BMJ") its licensees and where the relevant Journal is co-owned by BMJ to the co-owners of the Journal, to publish the Work in this journal and any other BMJ products and to exploit all rights, as set out in our [licence](#).

The Submitting Author accepts and understands that any supply made under these terms is made by BMJ to the Submitting Author unless you are acting as an employee on behalf of your employer or a postgraduate student of an affiliated institution which is paying any applicable article publishing charge ("APC") for Open Access articles. Where the Submitting Author wishes to make the Work available on an Open Access basis (and intends to pay the relevant APC), the terms of reuse of such Open Access shall be governed by a Creative Commons licence – details of these licences and which [Creative Commons](#) licence will apply to this Work are set out in our licence referred to above.

Other than as permitted in any relevant BMJ Author's Self Archiving Policies, I confirm this Work has not been accepted for publication elsewhere, is not being considered for publication elsewhere and does not duplicate material already published. I confirm all authors consent to publication of this Work and authorise the granting of this licence.

# How is the COVID-19 lockdown impacting the mental health of parents of school-age children in the United Kingdom?

## A cross-sectional online survey

---

1. Austen El-Osta<sup>1\*</sup> [a.el-osta@imperial.ac.uk](mailto:a.el-osta@imperial.ac.uk)
2. Aos Alaa<sup>1</sup> [aos.alaa18@imperial.ac.uk](mailto:aos.alaa18@imperial.ac.uk)
3. Iman Webber<sup>1</sup> [i.webber@imperial.ac.uk](mailto:i.webber@imperial.ac.uk)
4. Eva Riboli-Sasco<sup>1</sup> [e.riboli-sasco@imperial.ac.uk](mailto:e.riboli-sasco@imperial.ac.uk)
5. Emmanouil Bagkeris<sup>2</sup> [e.bagkeris@imperial.ac.uk](mailto:e.bagkeris@imperial.ac.uk)
6. Helen L Millar<sup>3</sup> [hlmillar1@gmail.com](mailto:hlmillar1@gmail.com)
7. Charlotte Vidal Hall<sup>4</sup> [chall163.205@lgflmail.org](mailto:chall163.205@lgflmail.org)
8. Azeem Majeed<sup>1</sup> [a.majeed@imperial.ac.uk](mailto:a.majeed@imperial.ac.uk)

- 1- Imperial College London, Department of Primary Care & Public Health
- 2- Imperial College London, National Health & Lung Institute
- 3- NHS Fife Community Service, Mental Health Service, Fife Health & Social Care Partnership
- 4- Chair of Governing Board, Brackenbury Primary School, London UK

\*Corresponding author

Dr Austen El-Osta, Self-Care Academic Research Unit (SCARU), Imperial College London Department of Primary Care & Public Health, 323 Reynolds Building, Charing Cross Hospital, St Dunstan's Road. London W6 8RP

Tel. 0207 594 7604

[a.el-osta@imperial.ac.uk](mailto:a.el-osta@imperial.ac.uk)

**Word count: 3866**

# ABSTRACT

## Objective

Investigate the impact of the COVID-19 lockdown on feelings of loneliness and social isolation in parents of school-age children

## Design

Cross sectional online survey of parents of primary and secondary school-age children

## Setting

Community setting

## Participants

1214 parents of school-age children in the United Kingdom

## Methods

An online survey explored the impact of lockdown on the mental health of parents with school-age children, and in particular about feelings of social isolation and loneliness. Associations between the UCLA three-item Loneliness Scale (UCLATILS), the Direct Measure of Loneliness (DMOL) and the characteristics of the study participants were assessed using ordinal logistic regression models

## Main outcome measures

Self-reported measures of social isolation and loneliness using UCLATILS and DMOL.

## Results

Half of respondents felt they lacked companionship, 45% had feelings of being left out, 58% felt isolated and 46% felt lonely. The factors that were associated with higher levels of loneliness on UCLATILS were female gender, parenting a child with special needs, lack of a dedicated space for distance learning, disruption of sleep patterns and low levels of physical activity during the lockdown. Factors associated with a higher DMOL were female gender, single-parenting, parenting a child with special needs, unemployment, low physical activity, lack of a dedicated study-space and disruption of sleep patterns during the lockdown.

## Conclusions

The COVID-19 lockdown has increased feelings of social isolation and loneliness among parents of school-age children. Two modifiable health seeking lifestyle behaviours (increased levels of physical activity and the maintenance of good sleep hygiene practices) were identified as key factors in reducing feelings of social isolation and loneliness during lockdown.

## Article summary

### Strengths and limitations of this study

- We surveyed 1214 parents of school-age children to assess the impact of lockdown measures on feelings of social isolation and loneliness
- We assessed direct and indirect measures of loneliness using the Direct Measure of Loneliness recommended by the Office of National Statistics and the validated UCLA 3-item Loneliness Scale, and used Cohen's kappa to determine whether both measures of loneliness are correlated
- We collected data on mental health, physical activity levels and other lifestyle factors in the first 100 days of the lockdown
- A key limitation of the study was lack of follow-up which restricted the assessment of the trajectory of feelings of social isolation and loneliness over time
- School closures have a significant impact on the mental health of parents of school-age children, and this should be taken into account when considering future COVID-19 risk mitigation strategies

## INTRODUCTION

The COVID-19 pandemic has affected educational systems worldwide, leading to the near-total closures of educational institutions in the United Kingdom. As of 6 May 2020, schools were suspended in 177 countries affecting over 1.3 billion learners worldwide (1), and in many cases closures have resulted in the universal cancellation of examinations (2, 3). UNICEF estimated that almost four months of education will be lost as a result of the lockdown (4). School closures have far-reaching economic and societal consequences, including the disruption of everyday behaviours and routines. In the UK, over two million workers have already lost their jobs (5, 6), and although the long-term impact of the pandemic on education is not yet clear, the pre-existing attainment gap between the poorest and richest children (7) may widen significantly as a result of COVID-19 (4, 8, 9). Children and young people make up 21% of the population of England (10), and by the time they returned to school after the summer break, some would have been out of education for nearly six months.

Lockdown measures significantly limit social interactions, opportunities for social intercourse or the ability to receive the social support needed to promote mental well-being (11). The temporary closure of schools also means that children miss out on vital social skills and physical activity which may cause further detriment to their mental health and the quality of their social interaction with their parents and other members of the household (12). Loss of routine social contact could also lead to different patterns of social response (13, 14) whilst increasing feelings of social isolation and loneliness (15-17). There is growing concern over the impact of school closures on the mental health and well-being of parents and school-age children (18-20), and in particular about increasing feelings of social isolation and loneliness (21).

The impact of loneliness on public mental health is well characterised (22), and includes depression (23, 24), anxiety (25) and suicide (26, 27), and is also linked with

1  
2  
3 cardiovascular conditions (28, 29) and cancer (30). Prolonged periods of loneliness  
4 and social isolation are also associated with future mental health problems up to 9  
5 years later (31), including a strong association with depression (32) and stress (33).  
6 Although acknowledged to be different concepts, social isolation and loneliness may  
7 affect people of all ages (34), and the terms are used interchangeably such that they  
8 are often considered together (35). There have been numerous attempts in the  
9 literature to identify predictors of loneliness (31, 36, 37), but this subjective  
10 phenomenon remains difficult to measure, and its prevalence is thought to be  
11 significantly under-represented. Known predictors of loneliness include living alone,  
12 living in rented accommodation, household size, education level, self-reported health  
13 measures and, paradoxically, living in population-dense areas.  
14  
15

16  
17 The measurement of social isolation and loneliness is challenging as it is largely  
18 subjective and qualitative in nature (38). The UK Office for National Statistics (ONS)  
19 recommends the use of the validated UCLA three-item loneliness scale (UCLATILS)  
20 as an indirect measure for loneliness, and an additional Direct Measure of Loneliness  
21 (DMOL) question (39). ONS recommends attempting to harmonise these indicators  
22 across the UK Government Statistical Service, but the recency of the  
23 recommendations may be a reason behind the lack of standardised and retrospective  
24 data on loneliness in the UK. Although both scores measure loneliness, they are  
25 fundamentally different. The composite score of UCLATIS measures general and  
26 indirect loneliness and feelings of social isolation, whereas the DMOL is a separate  
27 (single item) measure that assesses the current/temporal feeling of loneliness by the  
28 respondent and is recommended for use by ONS  
29  
30

31  
32 Successful interventions aimed at tackling social isolation and loneliness include  
33 leveraging existing community assets such as parks and green spaces, befriending  
34 schemes, skill development strategies, psychological therapies (40-43). The UK  
35 government published its first Loneliness Strategy in October 2018, signalling the first  
36 important step in tackling this rising problem of society. Preventative measures that  
37 can be implemented to reduce the risk of social isolation and loneliness and bridge  
38 social distancing during lockdown include the use of digital technologies. China and  
39 Singapore established various initiatives to minimise outbreak-related stress and poor  
40 mental wellbeing including the deployment of enhanced social support networks and  
41 psychological services that could be delivered online (44-46). Teachers can also play  
42 an important role in alleviating a child's sense of isolation at school (47, 48), but the  
43 extent to which this can be accomplished with live or online lessons through remote  
44 learning remains unclear. Reports have already documented loneliness in the elderly  
45 as a result of the COVID-19 lockdown (49), but research regarding this aspect of  
46 mental health on parents with school-age children during the pandemic is scarce in  
47 the first 100 days after the lockdown and this population remains largely understudied.  
48  
49

### 50 51 **Study objectives**

52 The aim of this study was to explore how the lockdown is affecting the mental health  
53 of parents of school-age children, and in particular to assess the impact of an extended  
54 period of school closures on feelings of social isolation & loneliness.  
55  
56  
57  
58  
59  
60



# METHODS

## Study design

We conducted a cross-sectional online survey of adult parents and legal guardians of children who were attending primary or secondary education in the UK.

The link to the electronic survey was published and available on the Imperial College Qualtrics platform between 29 May and 11 July 2020 (6 weeks). The survey was open and could be accessed by anyone with a link. Potentially eligible participants received an invitation email from the study team, and the head teacher of Brackenbury Primary School also disseminated the email and link to his counterparts in other schools. Study information was disseminated including the Participant Information Sheet (PIS) and link to the survey. The researchers' personal and professional networks were also mobilized to respond and further disseminate the eSurvey among eligible participants. The PIS included information regarding the study's aims, the protection of participants' personal data, their right to withdraw from the study at any time, which data were stored, where and for how long, who the investigator was, the purpose of the study and survey length. Participants were informed that this was a voluntary survey without any monetary incentives but offering the possibility to access the findings at a later stage whilst underlying the potential collective benefits of taking part in terms of helping advance knowledge in this area and the formulation of future policies to tackle the COVID-19 pandemic. The data collected were stored on the Imperial College London secure database and only the team researchers could access the eSurvey results.

The survey comprised a total of 51 questions displayed on one page and was accessible using a personal computer or smartphone. Questions regarding demographic characteristics of the users included information on gender, age, ethnicity, educational level, number of people living in the household, first part of postal code and employment status. Participants could review their answers before submitting them. All data collected through the survey were anonymised and not personally identifiable. The online survey technical functionality was tested before being published. The first question asked participants to confirm their consent to participate in the eSurvey.

Experiences and perceptions related to the impact of the lockdown on the mental health of parents and other members of their household were evaluated through a number of questions concerning self-reported or perceived levels of depression, stress, feeling of loneliness, social isolation and boredom. Indirect measures of loneliness were measured using the validated UCLA 3-item Loneliness Scale (UCLATILS) with responses never/hardly ever (score of 1), some of the time (score of 2), and often (score of 3) (50). The questions were each scored 1 to 3, then totalled to a score ranging from 3 to 9. Indirect measure of loneliness using UCLATILS was subsequently categorized as follows: no loneliness (score =3), moderate loneliness (score = 4-6), and severe loneliness (score = 7-9). An additional one item Direct Measure of Loneliness (DMOL) was also used as recommended by the Office of National Statistics (51). Questions concerning users' experiences were scored on a 1-5 Likert scale. Respondents were able to refrain from providing an answer by selecting 'no opinion'. Such answers were treated as missing data in all the analyses (listwise exclusion) but due to the small number of missingness (<1.5%) the data were not



1  
2  
3 imputed (52, 53). The association of the two scores was tested using the Cohen's  
4 kappa test of agreement.  
5

6  
7 The survey included eleven additional questions to explore perceptions of feelings of  
8 social isolation pre- and post-school closures. Perceptions on remote learning were  
9 explored through questions related to whether or not their child received regular  
10 homework, live or online lessons, had access to technology (personal computer, tablet  
11 or phone), time spent studying, and whether the child had access to a dedicated space  
12 to study. Perceptions on the impact of school closures on the lifestyle behaviours of  
13 respondents and their school children were recorded by asking questions relating to  
14 pre- and post-lockdown self-reported measures of physical activity levels of both  
15 parents and children, the children's sleeping patterns and how children spent their  
16 leisure time. The quality of the survey was assessed by completing the Checklist for  
17 Reporting Results of Internet E-Surveys (CHERRIES).  
18  
19

### 20 **Statistical analysis**

21 Analyses were conducted separately for the UCLATILS and DMOL as recommended  
22 by the ONS (51). Parent and child characteristics were described using frequencies  
23 and percentages. Pearson's chi-square test was used to identify differences of  
24 statistical significance. Associations between the UCLATILS, DMOL and the  
25 characteristics of the study participants were assessed using ordinal logistic  
26 regression models. The factors that were significant in the univariable models (p-value  
27 <0.05) were considered in the multivariable analyses. All analyses were performed  
28 using Stata 15 statistical software (StataCorp).  
29  
30

### 31 **Ethics**

32 The study was given ethical approval by Imperial College Research Ethics Committee  
33 (ICREC # 20IC5978). Participants consented to take part in the survey.  
34  
35

### 36 **Patient and Public Involvement**

37 No patient was involved. The study protocol and online survey were developed in  
38 collaboration with the Governing Board of Brackenbury Primary School in the London  
39 Borough of Hammersmith & Fulham where the lead author is also a co-opted School  
40 governor  
41  
42  
43  
44  
45  
46  
47  
48  
49  
50  
51  
52  
53  
54  
55  
56  
57  
58  
59  
60

# RESULTS

## Demographic profile of respondents

The electronic survey captured responses from 1214 respondents from across England (**Table 1**). More than half (53.1%) were aged 40-49 years, whereas 2.5%, 29.2%, 14.4% and 0.9% were in the second, third, fifth or sixth decade of age respectively. Eighty seven percent of respondents were female, and 80.5% identified as white ethnic background. Sixty six percent were educated to university degree, 70.9% were in full or part-time employment and 87.1% had a partner that was employed. A fifth (20.8%) had one child, 53.5% had two children, and 25.8% had three or more children. Only 3.8% were a single parent family, whereas 75.3% of respondents were living in households consisting of 4 or more people.

## School and children characteristics

Nine out of ten (89.5%) children attended a state funded school. More than half (54.1%) of respondents had a child receiving primary education, 22.3% in secondary school and 23.6% had more than one child, one attending either primary or secondary schools. Eleven percent of respondents had a child a special educational need or disability (SEND) . Sixty eight percent indicated that their child had access to a dedicated space where they can learn or study at home. The vast majority (97.9%) of children had access to a personal computer, laptop, tablet or smartphone, of whom 54.0% had their own devices and 43.9% did not have their own but could access devices belonging to other members of their household and two percent did not have access to any technology. Remote learning was accessed by 90.7% of children, but only 47.7% of respondents reported their child was receiving live or online lessons. Only 9.5% of children received private tuition. The time spent on remote learning ranged between 0-8 hours per day, with 36.8% studying for less than 2 hours, 30.7% studying between 2-4 hours and 32.5% studding more than 4 hours.

## Mental health and physical wellbeing

The vast majority of respondents felt their children were experiencing medium to high levels of boredom (93.8%) and medium or high levels of stress (82.3%) during the lockdown compared to before school closures. Almost half of the participants (48.1%) have reported a shift in the sleeping pattern of children by staying up until much later in the evening during the lockdown. Only 37.2% of respondents reported that the sleeping patterns of their children did not change during the lockdown. Forty-five percent reported that their levels of physical activity were low during the lockdown. Seventy percent of respondents felt that school closures also reduced the physical activity of their child.

Table 1: Respondent characteristics

|                               | Total |         | UCL three-item loneliness scale (UCLATILS) |        |          |        |      |        | ONS Direct measure of loneliness (DMOL) |     |          |     |        |     |         |         |
|-------------------------------|-------|---------|--------------------------------------------|--------|----------|--------|------|--------|-----------------------------------------|-----|----------|-----|--------|-----|---------|---------|
|                               | N     | (%)     | No                                         |        | Moderate |        | High |        | No                                      |     | Moderate |     | High   |     | p value |         |
|                               |       |         | n                                          | (%)    | n        | (%)    | n    | (%)    | p-value                                 | n   | (%)      | n   | (%)    | n   | (%)     | p value |
| <b>PARENT CHARACTERISTICS</b> |       |         |                                            |        |          |        |      |        |                                         |     |          |     |        |     |         |         |
| <b>Age group</b>              |       |         |                                            |        |          |        |      |        | 0.05                                    |     |          |     |        |     |         | 0.004   |
| 20-29                         | 30    | (100.0) | 6                                          | (20.0) | 10       | (33.3) | 14   | (46.7) |                                         | 9   | (30.0)   | 13  | (43.3) | 8   | (26.7)  |         |
| 30-39                         | 354   | (100.0) | 122                                        | (34.5) | 85       | (24.0) | 147  | (41.5) |                                         | 166 | (47.6)   | 127 | (36.4) | 56  | (16.0)  |         |
| 40-49                         | 643   | (100.0) | 202                                        | (31.4) | 184      | (28.6) | 257  | (40.0) |                                         | 346 | (54.3)   | 219 | (34.4) | 72  | (11.3)  |         |
| 50-59                         | 174   | (100.0) | 73                                         | (42.0) | 52       | (29.9) | 49   | (28.2) |                                         | 109 | (63.0)   | 46  | (26.6) | 18  | (10.4)  |         |
| 60+                           | 11    | (100.0) | 4                                          | (36.4) | 3        | (27.3) | 4    | (36.4) |                                         | 7   | (63.6)   | 3   | (27.3) | 1   | (9.1)   |         |
| <b>Gender</b>                 |       |         |                                            |        |          |        |      |        | <0.001                                  |     |          |     |        |     |         | 0.002   |
| Male                          | 149   | (100.0) | 75                                         | (50.3) | 31       | (20.8) | 43   | (28.9) |                                         | 99  | (66.4)   | 39  | (26.2) | 11  | (7.4)   |         |
| Female                        | 1062  | (100.0) | 331                                        | (31.2) | 303      | (28.5) | 428  | (40.3) |                                         | 537 | (51.1)   | 369 | (35.1) | 144 | (13.7)  |         |
| <b>Ethnicity</b>              |       |         |                                            |        |          |        |      |        | 0.23                                    |     |          |     |        |     |         | 0.42    |
| White                         | 962   | (100.0) | 322                                        | (33.5) | 269      | (28.0) | 371  | (38.6) |                                         | 512 | (53.7)   | 322 | (33.8) | 120 | (12.6)  |         |
| Black                         | 25    | (100.0) | 7                                          | (28.0) | 5        | (20.0) | 13   | (52.0) |                                         | 11  | (45.8)   | 8   | (33.3) | 5   | (20.8)  |         |
| Asian                         | 101   | (100.0) | 27                                         | (26.7) | 25       | (24.8) | 49   | (48.5) |                                         | 43  | (43.4)   | 39  | (39.4) | 17  | (17.2)  |         |
| Mixed/other                   | 107   | (100.0) | 42                                         | (39.3) | 30       | (28.0) | 35   | (32.7) |                                         | 60  | (56.6)   | 34  | (32.1) | 12  | (11.3)  |         |
| <b>Level of education</b>     |       |         |                                            |        |          |        |      |        | 0.15                                    |     |          |     |        |     |         | 0.004   |
| Secondary school              | 274   | (100.0) | 92                                         | (33.6) | 67       | (24.5) | 115  | (42.0) |                                         | 125 | (46.3)   | 95  | (35.2) | 50  | (18.5)  |         |
| Diploma                       | 127   | (100.0) | 40                                         | (31.5) | 34       | (26.8) | 53   | (41.7) |                                         | 64  | (51.2)   | 42  | (33.6) | 19  | (15.2)  |         |
| Bachelor's Degree             | 446   | (100.0) | 151                                        | (33.9) | 126      | (28.3) | 169  | (37.9) |                                         | 234 | (53.1)   | 155 | (35.1) | 52  | (11.8)  |         |
| Master's Degree               | 264   | (100.0) | 81                                         | (30.7) | 77       | (29.2) | 106  | (40.2) |                                         | 152 | (57.8)   | 90  | (34.2) | 21  | (8.0)   |         |
| Doctorate                     | 88    | (100.0) | 39                                         | (44.3) | 28       | (31.8) | 21   | (23.9) |                                         | 58  | (65.9)   | 21  | (23.9) | 9   | (10.2)  |         |
| <b>Employment</b>             |       |         |                                            |        |          |        |      |        | 0.15                                    |     |          |     |        |     |         | 0.001   |
| Employed full-time            | 479   | (100.0) | 168                                        | (35.1) | 143      | (29.9) | 168  | (35.1) |                                         | 264 | (55.5)   | 158 | (33.2) | 54  | (11.3)  |         |
| Employed part-time            | 372   | (100.0) | 121                                        | (32.5) | 98       | (26.3) | 153  | (41.1) |                                         | 189 | (51.2)   | 133 | (36.0) | 47  | (12.7)  |         |

|                                                     | Total |         | UCL three-item loneliness scale (UCLATILS) |        |          |        |      |        | ONS Direct measure of loneliness (DMOL) |     |          |     |        |     |         |         |
|-----------------------------------------------------|-------|---------|--------------------------------------------|--------|----------|--------|------|--------|-----------------------------------------|-----|----------|-----|--------|-----|---------|---------|
|                                                     | N     | (%)     | No                                         |        | Moderate |        | High |        | No                                      |     | Moderate |     | High   |     | p value |         |
|                                                     |       |         | n                                          | (%)    | n        | (%)    | n    | (%)    | p-value                                 | n   | (%)      | n   | (%)    | n   | (%)     | p value |
| Self-employed                                       | 182   | (100.0) | 63                                         | (34.6) | 52       | (28.6) | 67   | (36.8) |                                         | 107 | (59.4)   | 59  | (32.8) | 14  | (7.8)   |         |
| Not working**                                       | 170   | (100.0) | 53                                         | (31.2) | 37       | (21.8) | 80   | (47.1) |                                         | 74  | (44.3)   | 55  | (32.9) | 38  | (22.8)  |         |
| <b>Number of people in the household</b>            |       |         |                                            |        |          |        |      |        | 0.37                                    |     |          |     |        |     |         | 0.024   |
| 2                                                   | 45    | 100.0)  | 11                                         | (24.4) | 11       | (24.4) | 23   | (51.1) |                                         | 13  | (28.9)   | 21  | (46.7) | 11  | (24.4)  |         |
| 3                                                   | 249   | 100.0)  | 85                                         | (34.1) | 66       | (26.5) | 98   | (39.4) |                                         | 136 | (54.6)   | 76  | (30.5) | 37  | (14.9)  |         |
| 4                                                   | 597   | 100.0)  | 201                                        | (33.7) | 173      | (29.0) | 223  | (37.4) |                                         | 323 | (54.9)   | 202 | (34.4) | 63  | (10.7)  |         |
| 5                                                   | 208   | (100.0) | 76                                         | (36.5) | 58       | (27.9) | 74   | (35.6) |                                         | 114 | (55.3)   | 63  | (30.6) | 29  | (14.1)  |         |
| 6+                                                  | 94    | (100.0) | 29                                         | (30.9) | 20       | (21.3) | 45   | (47.9) |                                         | 46  | (49.5)   | 35  | (37.6) | 12  | (12.9)  |         |
| <b>Physical activity levels during the lockdown</b> |       |         |                                            |        |          |        |      |        | 0.001                                   |     |          |     |        |     |         | <0.001  |
| Low                                                 | 176   | (100.0) | 48                                         | (27.3) | 50       | (28.4) | 78   | (44.3) |                                         | 85  | (48.9)   | 51  | (29.3) | 38  | (21.8)  |         |
| Medium                                              | 575   | (100.0) | 178                                        | (31.0) | 153      | (26.6) | 244  | (42.4) |                                         | 279 | (48.9)   | 220 | (38.5) | 72  | (12.6)  |         |
| High                                                | 436   | (100.0) | 175                                        | (40.1) | 123      | (28.2) | 138  | (31.7) |                                         | 262 | (60.9)   | 126 | (29.3) | 42  | (9.8)   |         |
| <b>CHILD CHARACTERISTICS</b>                        |       |         |                                            |        |          |        |      |        |                                         |     |          |     |        |     |         |         |
| <b>Level of schooling</b>                           |       |         |                                            |        |          |        |      |        | 0.04                                    |     |          |     |        |     |         | 0.001   |
| Primary                                             | 656   | (100.0) | 209                                        | (31.9) | 171      | (26.1) | 276  | (42.1) |                                         | 319 | (49.1)   | 226 | (34.8) | 105 | (16.2)  |         |
| Secondary                                           | 270   | (100.0) | 106                                        | (39.3) | 78       | (28.9) | 86   | (31.9) |                                         | 165 | (61.1)   | 81  | (30.0) | 24  | (8.9)   |         |
| Both (I have ≥1 child)                              | 285   | (100.0) | 91                                         | (31.9) | 85       | (29.8) | 109  | (38.3) |                                         | 152 | (54.5)   | 101 | (36.2) | 26  | (9.3)   |         |
| <b>Special needs</b>                                |       |         |                                            |        |          |        |      |        | 0.009                                   |     |          |     |        |     |         | 0.008   |
| Yes                                                 | 133   | (100.0) | 35                                         | (26.3) | 30       | (22.6) | 68   | (51.1) |                                         | 53  | (40.8)   | 53  | (40.8) | 24  | (18.5)  |         |
| No                                                  | 1077  | (100.0) | 371                                        | (34.4) | 304      | (28.2) | 402  | (37.3) |                                         | 583 | (54.6)   | 354 | (33.1) | 131 | (12.3)  |         |
| <b>Dedicated space to study</b>                     |       |         |                                            |        |          |        |      |        | 0.001                                   |     |          |     |        |     |         | <0.001  |
| Yes                                                 | 831   | (100.0) | 304                                        | (36.6) | 230      | (27.7) | 297  | (35.7) |                                         | 476 | (57.8)   | 256 | (31.1) | 91  | (11.1)  |         |
| No                                                  | 379   | (100.0) | 102                                        | (26.9) | 104      | (27.4) | 173  | (45.6) |                                         | 160 | (42.7)   | 151 | (40.3) | 64  | (17.1)  |         |
| <b>Access to technology</b>                         |       |         |                                            |        |          |        |      |        | 0.02                                    |     |          |     |        |     |         | <0.001  |
| Yes                                                 | 653   | (100.0) | 240                                        | (36.8) | 173      | (26.5) | 240  | (36.8) |                                         | 380 | (58.8)   | 195 | (30.2) | 71  | (11.0)  |         |
| Yes, but not their own                              | 532   | (100.0) | 162                                        | (30.5) | 157      | (29.5) | 213  | (40.0) |                                         | 253 | (47.8)   | 202 | (38.2) | 74  | (14.0)  |         |

1  
2  
3  
4  
5  
6  
7  
8  
9  
10  
11  
12  
13  
14  
15  
16  
17  
18  
19  
20  
21  
22  
23  
24  
25  
26  
27  
28  
29  
30  
31  
32  
33  
34  
35  
36  
37  
38  
39  
40  
41  
42  
43  
44  
45  
46

|                                                | Total |         | UCL three-item loneliness scale (UCLATILS) |        |          |        |      |        | ONS Direct measure of loneliness (DMOL) |     |          |        |      |        |         |        |
|------------------------------------------------|-------|---------|--------------------------------------------|--------|----------|--------|------|--------|-----------------------------------------|-----|----------|--------|------|--------|---------|--------|
|                                                | N     | (%)     | No                                         |        | Moderate |        | High |        | No                                      |     | Moderate |        | High |        | p value |        |
|                                                |       |         | n                                          | (%)    | n        | (%)    | n    | (%)    | n                                       | (%) | n        | (%)    | n    | (%)    |         |        |
| No                                             | 25    | (100.0) | 5                                          | (20.0) | 4        | (16.0) | 16   | (64.0) |                                         |     | 4        | (17.4) | 10   | (43.5) | 9       | (39.1) |
| <b>In receipt of distance learning</b>         |       |         |                                            |        |          |        |      |        | 0.46                                    |     |          |        |      |        |         | 0.03   |
| Yes                                            | 1101  | (100.0) | 375                                        | (34.1) | 301      | (27.3) | 425  | (38.6) |                                         |     | 589      | (54.0) | 368  | (33.8) | 133     | (12.2) |
| No                                             | 110   | (100.0) | 31                                         | (28.2) | 33       | (30.0) | 46   | (41.8) |                                         |     | 47       | (43.1) | 40   | (36.7) | 22      | (20.2) |
| <b>In receipt of live/online lessons</b>       |       |         |                                            |        |          |        |      |        | 0.24                                    |     |          |        |      |        |         | 0.001  |
| Yes                                            | 409   | (100.0) | 142                                        | (34.7) | 116      | (28.4) | 151  | (36.9) |                                         |     | 234      | (57.6) | 133  | (32.8) | 39      | (9.6)  |
| No                                             | 449   | (100.0) | 139                                        | (31.0) | 119      | (26.5) | 191  | (42.5) |                                         |     | 210      | (47.1) | 160  | (35.9) | 76      | (17.0) |
| <b>Sleeping pattern</b>                        |       |         |                                            |        |          |        |      |        | <0.001                                  |     |          |        |      |        |         | <0.001 |
| No major change in sleeping pattern            | 449   | (100.0) | 187                                        | (41.6) | 128      | (28.5) | 134  | (29.8) |                                         |     | 285      | (63.9) | 123  | (27.6) | 38      | (8.5)  |
| Slight change                                  | 168   | (100.0) | 61                                         | (36.3) | 44       | (26.2) | 63   | (37.5) |                                         |     | 90       | (54.9) | 53   | (32.3) | 21      | (12.8) |
| child now sleeps much later in the evening     | 580   | (100.0) | 153                                        | (26.4) | 158      | (27.2) | 269  | (46.4) |                                         |     | 253      | (44.0) | 229  | (39.8) | 93      | (16.2) |
| child now sleeping much earlier in the evening | 9     | (100.0) | 4                                          | (44.4) | 3        | (33.3) | 2    | (22.2) |                                         |     | 7        | (77.8) | 1    | (11.1) | 1       | (11.1) |

**Table 2: Univariable and multivariable association of three-item UCLATILS with characteristics of study participants**

|                                                                  | Univariable       |         | Multivariable        |         |
|------------------------------------------------------------------|-------------------|---------|----------------------|---------|
|                                                                  | OR (95% CI)       | p-value | Adjusted OR (95% CI) | p-value |
| <b>Age</b>                                                       |                   |         |                      |         |
| 50+                                                              | <i>Ref.</i>       |         | <i>Ref.</i>          |         |
| 20-39                                                            | 1.56 (1.12, 2.16) | 0.008   | 1.26 (0.85, 1.86)    | 0.24    |
| 40-49                                                            | 1.59 (1.18, 2.16) | 0.003   | 1.38 (0.98, 1.94)    | 0.07    |
| <b>Gender of the parent</b>                                      |                   |         |                      |         |
| Male                                                             | <i>Ref.</i>       |         | <i>Ref.</i>          |         |
| Female                                                           | 2.03 (1.46, 2.82) | <0.001  | 1.82 (1.29, 2.57)    | 0.001   |
| <b>Level of schooling</b>                                        |                   |         |                      |         |
| Secondary                                                        | <i>Ref.</i>       |         | <i>Ref.</i>          |         |
| Primary                                                          | 1.41 (1.08, 1.83) | 0.011   | 1.28 (0.94, 1.75)    | 0.12    |
| Both (more than 1 child)                                         | 1.32 (0.97, 1.79) | 0.079   | 1.13 (0.81, 1.59)    | 0.47    |
| <b>Access to technology</b>                                      |                   |         |                      |         |
| Yes                                                              | <i>Ref.</i>       |         | <i>Ref.</i>          |         |
| No                                                               | 2.51 (1.11, 5.71) | 0.03    | 1.62 (0.70, 3.74)    | 0.26    |
| <b>Special needs</b>                                             |                   |         |                      |         |
| No                                                               | <i>Ref.</i>       |         | <i>Ref.</i>          |         |
| Yes                                                              | 1.66 (1.18, 2.35) | 0.004   | 1.44 (1.01, 2.06)    | 0.04    |
| <b>Dedicated space</b>                                           |                   |         |                      |         |
| Yes                                                              | <i>Ref.</i>       |         | <i>Ref.</i>          |         |
| No                                                               | 1.52 (1.21, 1.91) | <0.001  | 1.33 (1.04, 1.69)    | 0.02    |
| <b>Change in the sleeping patterns</b>                           |                   |         |                      |         |
| No                                                               | <i>Ref.</i>       |         | <i>Ref.</i>          |         |
| Slight disruption                                                | 1.31 (0.94, 1.82) | 0.110   | 1.27 (0.91, 1.78)    | 0.16    |
| Marked disruption*                                               | 1.95 (1.55, 2.46) | <0.001  | 1.90 (1.50, 2.41)    | <0.001  |
| <b>Physical activity level of the parent during the lockdown</b> |                   |         |                      |         |
| High                                                             | <i>Ref.</i>       |         | <i>Ref.</i>          |         |
| Low                                                              | 1.77 (1.28, 2.45) | 0.001   | 1.53 (1.09, 2.14)    | 0.01    |
| Medium                                                           | 1.56 (1.24, 1.97) | <0.001  | 1.45 (1.14, 1.84)    | 0.002   |

\*Applies to children who's sleeping pattern changed and slept much earlier or later than prior to lockdown

**Table 3: Univariable and multivariable association of ONS Direct Measure of Loneliness (DMOL) score with characteristics of study participants**

|                                                                  | Univariable       |         | Multivariable        |         |
|------------------------------------------------------------------|-------------------|---------|----------------------|---------|
|                                                                  | OR (95% CI)       | p-value | Adjusted OR (95% CI) | p-value |
| <b>Age</b>                                                       |                   |         |                      |         |
| 50+                                                              | <i>Ref.</i>       |         | <i>Ref.</i>          |         |
| 20-39                                                            | 1.98 (1.38, 2.85) | <0.001  | 1.47 (0.95, 2.27)    | 0.09    |
| 40-49                                                            | 1.37 (0.97, 1.92) | 0.07    | 1.22 (0.83, 1.79)    | 0.32    |
| <b>Gender of the parent</b>                                      |                   |         |                      |         |
| Male                                                             | <i>Ref.</i>       |         | <i>Ref.</i>          |         |
| Female                                                           | 1.88 (1.31, 2.71) | 0.001   | 1.52 (1.03, 2.24)    | 0.03    |
| <b>Education</b>                                                 |                   |         |                      |         |
| University degree or higher                                      | <i>Ref.</i>       |         | <i>Ref.</i>          |         |
| Secondary school or high school diploma                          | 1.50 (1.18, 1.90) | 0.001   | 1.27 (0.98, 1.64)    | 0.07    |
| <b>Employment status</b>                                         |                   |         |                      |         |
| Employed                                                         | <i>Ref.</i>       |         | <i>Ref.</i>          |         |
| Unemployed*                                                      | 1.83 (1.32, 2.53) | <0.001  | 1.70 (1.21, 2.38)    | 0.002   |
| <b>Physical activity level of the parent during the lockdown</b> |                   |         |                      |         |
| High                                                             | <i>Ref.</i>       |         | <i>Ref.</i>          |         |
| Medium                                                           | 1.62 (1.26, 2.08) | <0.001  | 1.53 (1.18, 1.99)    | 0.002   |
| Low                                                              | 1.86 (1.30, 2.64) | 0.001   | 1.53 (1.06, 2.21)    |         |
| <b>Number of people at home</b>                                  |                   |         |                      |         |
| 3 or above                                                       | <i>Ref.</i>       |         | <i>Ref.</i>          |         |
| Single parent family                                             | 2.49 (1.42, 4.39) | 0.002   | 2.12 (1.17, 3.82)    | 0.01    |
| <b>Level of schooling</b>                                        |                   |         |                      |         |
| Secondary                                                        | <i>Ref.</i>       |         | <i>Ref.</i>          |         |
| Primary                                                          | 1.65 (1.23, 2.20) | 0.001   | 1.35 (0.96, 1.92)    | 0.09    |
| Both (more than 1 child)                                         | 1.31 (0.94, 1.84) | 0.11    | 1.05 (0.72, 1.53)    | 0.79    |
| <b>Access to technology</b>                                      |                   |         |                      |         |
| Yes                                                              | <i>Ref.</i>       |         | <i>Ref.</i>          |         |
| No                                                               | 4.09 (1.86, 8.99) | <0.001  | 1.60 (0.69, 3.71)    | 0.28    |
| <b>Special needs</b>                                             |                   |         |                      |         |
| No                                                               | <i>Ref.</i>       |         | <i>Ref.</i>          |         |
| Yes                                                              | 1.82 (1.28, 2.58) | 0.001   | 1.45 (1.01, 2.08)    | 0.05    |
| <b>Dedicated space</b>                                           |                   |         |                      |         |



|                                        | Univariable       |         | Multivariable        |         |
|----------------------------------------|-------------------|---------|----------------------|---------|
|                                        | OR (95% CI)       | p-value | Adjusted OR (95% CI) | p-value |
| Yes                                    | <i>Ref.</i>       |         | <i>Ref.</i>          |         |
| No                                     | 1.83 (1.44, 2.33) | <0.001  | 1.59 (1.23, 2.06)    | <0.001  |
| <b>Distance learning</b>               |                   |         |                      |         |
| Yes                                    | <i>Ref.</i>       |         | <i>Ref.</i>          |         |
| No                                     | 1.56 (1.06, 2.29) | 0.03    | 1.34 (0.88, 2.03)    | 0.17    |
| <b>Change in the sleeping patterns</b> |                   |         |                      |         |
| No                                     | <i>Ref.</i>       |         | <i>Ref.</i>          |         |
| Slightly                               | 1.45 (1.01, 2.09) | 0.04    | 1.41 (0.97, 2.05)    | 0.07    |
| A lot                                  | 2.18 (1.70, 2.81) | <0.001  | 2.15 (1.65, 2.79)    | <0.001  |

\* Unemployed/ Unable to work/Student/Retired

For peer review only

### Loneliness and social isolation

The Cohen's kappa test between the direct and indirect measures of loneliness (UCLATIS and DMOL) suggested lack of agreement ( $\kappa = -0.34$ ) and therefore it was deemed important to explore the two scores separately. On the UCLATIS which collected was an indirect measure of loneliness, forty six percent (46.3%) of respondents felt they lacked companionship, whereas 52.4% reported having feelings of being left out, and 58% reported feeling isolated from others (**Table 1; Supplementary table**). More than half (58.9%) reported they felt lonely often or most of the time on the direct measure (DMOL). Parents reported that 58.5%, 71.0% and 72.2% of children felt they lacked companionship, had feelings of being left out, or feeling isolated from others in that same order, whereas 46.9% showed signs of feeling lonely often or most of the time on DMOL. Overall, 43.3% of respondents confirmed that their children were experiencing feelings of social isolation. More than two thirds (68.8%) felt that video calls where their child could see their teacher could help reduce feelings of social isolation, whereas 60.6% felt this could reduce feelings of loneliness. Overall, 43.9% and 33.0% felt that the lockdown and school closures respectively had caused them and their child to feel significantly more depressed (**Supplementary table**).

### UCLA three-item Loneliness Score (UCLATIS)

The multivariable ordinal logistic model suggested that the main factors associated with significantly higher odds of having a higher level of UCLATIS (the indirect measure of loneliness) were female gender of the respondent, having a child with special needs, lack of a dedicated space, a change in the child's sleeping patterns, and having low or medium physical activity during the lockdown (**table 2**). The univariably significant association of age, level of schooling (primary or secondary education) and access to technology with UCLATIS were attenuated and became non-significant in the multivariable model. Compared to male respondents, females were 82% more likely to have a higher score on UCLATIS. Parents of children who had special needs, and those who lacked a dedicated space to study had 44.0% and 33% higher odds of scoring higher on UCLATIS respectively. Parents with a low or medium level of physical activity had 53% and 45% higher odds of reporting a higher UCLATIS respectively compared to respondents who had high levels of physical activity during lockdown (**table 2**). Households who reported a disruption in the sleeping pattern of their children were 90% more likely to report a higher UCLATIS.

### Direct Measure of Loneliness (DMOL)

The factors associated with higher DMOL (the direct measure) were gender, employment status, physical activity level, household size, having children with special needs, having dedicated space to study and changes in sleeping patterns during the lockdown (**table 3**). In particular, female respondents and those who were unemployed were 52.0% and 70.0% more likely to report a higher DMOL in that same order. Respondents with low or medium levels of physical activity during the lockdown had a 53% increase in the odds of scoring a higher DMOL. Having a child with special needs increased the odds of scoring higher on DMOL by 45%, whereas single parent families and those whose children changed their sleeping patterns had 2.1-fold higher odds of scoring a higher DMOL.

Households who reported a lack of a dedicated space to study scored 59.0% higher on DMOL (**table 3**). The associations of other parent and child characteristics that

1  
2  
3 were significantly associated in the univariate analysis with a DMOL (age, education,  
4 level of schooling, access to technology and distance learning) were attenuated and  
5 became nonsignificant in the multivariable model.  
6  
7

### 8 **General perceptions about lockdown, school closures, cancellation of exams** 9 **and student preparedness for next academic year**

10 Two thirds of respondents (66.2%) said they were indifferent that end-of-year exams  
11 were being cancelled, compared to 10.8% who were happy, and 23.0% who said they  
12 were unhappy with this decision. Parents felt that only 30% of children preferred  
13 exams to be online as opposed to face-to-face. Fifty six percent of parents of  
14 secondary education children felt that their child would not be adequately prepared to  
15 sit exams if they were to be taken online. Twenty one percent reported they would be  
16 unhappy or very unhappy to send their child back to school should the lockdown be  
17 lifted and schools re-open again before the end of the academic year 2019/2020.  
18  
19  
20  
21  
22

## 23 **DISCUSSION**

24 We collected data for 6 weeks during the first 100 days of lockdown in the UK and  
25 found that female gender, lower levels of physical activity, parenting a child with  
26 special needs, lower levels of education, unemployment, reduced access to  
27 technology, not having a dedicated space where the child can study and the disruption  
28 of the child's sleep patterns during the lockdown are the main factors associated with  
29 a significantly higher odds of parents reporting feelings of loneliness.  
30  
31  
32

33 Our findings are consistent with the results of other studies (54, 55) and reviews (56,  
34 57) including those that tracked the mental health of adults, children and young people  
35 aged 4-16 years throughout the COVID-19 crisis and showed that parents reported an  
36 increase in their child's emotional, behavioural, and restless/attentional difficulties (21,  
37 58). It also corroborates existing data which shows that access to personal  
38 computers, smartphones and tablets varies widely in relation to income levels, with  
39 private schools being significantly more likely to provide children with adequate  
40 equipment including laptops and tablets (7). It is unsurprising that appropriate access  
41 to technology has direct implications on the efficiency of online schooling since remote  
42 learning relies on digital access and electronic devices that the child can use at home  
43 (59).  
44  
45  
46

47 Another major issue with online provision and remote learning is access to a dedicated  
48 space for the child at home that will facilitate such learning. Our study highlighted a  
49 significant association between the lack of a dedicated space and increased measures  
50 of loneliness in adult respondents using both the direct and indirect measures of  
51 loneliness. The lack of a dedicated space may be a proxy-measure for lower income  
52 in families who are more likely to live in an overcrowded environment (60). The pre-  
53 existing attainment gap which loomed between the poorest and richest children  
54 showed that children from disadvantaged backgrounds were twice as likely to leave  
55 formal education without GCSEs in English and Maths compared to their peers who  
56 live in less deprived areas or whose parents have a higher total household income  
57 (61). The Education Endowment Foundation has also suggested that school closures  
58 could reverse the progress made in the last decade to narrow this gap (62) as children  
59  
60

1  
2  
3 from better-off families will have received as much as 35% more home learning than  
4 children from the poorest households (63). This raises particular concerns for parents  
5 of low-income who are less likely to be in a position to assist their children's studies  
6 with financial resources and this can play a significant role in a child's learning (64).  
7 School closures have thus shed a light on the subsequent social and economic  
8 consequences of the pandemic including a rise in inequalities and those factors that  
9 could be considered as a proxy-measure of income deprivation such as digital  
10 exclusion, reduced access to tablets and smartphones or a dedicated space where  
11 the child can study (33).  
12  
13

14  
15 A recent study established that disruption of good sleep hygiene practices could lead  
16 to a behavioural profile of social withdrawal and loneliness (65), whereas loneliness is  
17 a known independent risk factor for physical inactivity (66). This was reflected in the  
18 findings of our study which showed that both modifiable risk factors (lower physical  
19 activity levels and disruption of sleep patterns) were independently associated with  
20 higher loneliness. Pertinently, both of these personal risk factors are modifiable and  
21 could be addressed through self-care practices. For example, exercise has long been  
22 associated with better sleep, and evidence is accumulating on the efficacy of exercise  
23 as a nonpharmacologic treatment option for disturbed sleep (67). Physical activity  
24 interventions in particular have also been shown to reduce loneliness and improve  
25 psychological wellbeing (68, 69).  
26  
27

28  
29 Social interaction and physical activity are also known key factors in promoting a  
30 healthy state of physical and mental wellbeing (70-72), but the unprecedented social  
31 distancing and lockdown measures have forced the vast majority of the UK population  
32 to stay at home for long periods of time. This significantly limited routine opportunities  
33 for social interactions with peers, while the closure of schools, gyms and some parks  
34 and play areas significantly reduced physical activity levels, including those of parents  
35 of school-age children since this group remains largely understudied. Many  
36 households were also faced with various issues including concern over job security  
37 coupled to the increased need to supervise their children's learning and homework  
38 when one or both parents are required to work from home. Our study showed that  
39 these factors are likely to adversely affect the mental health of individuals, and in  
40 particular by increasing the prevalence of social isolation and loneliness in  
41 households.  
42  
43

44  
45 Our UK study illustrated an increasing trend in the prevalence of social isolation and  
46 loneliness in parents of school-age children during the lockdown as was evidenced  
47 among emergency workers and other the quarantined populations (73, 74). However,  
48 this is the first study that investigated the level of loneliness in a population of parents  
49 with school-age children in the UK using both a direct and an indirect measure of  
50 loneliness.  
51

52  
53 The findings of this study may be used to direct interventions aimed at reducing  
54 feelings of social isolation and loneliness and to promote good mental health of  
55 parents with school-age children. COVID-19 lockdown can be deemed as a period of  
56 crisis that has dramatically affected the dynamics of households with school-age  
57 children. It is very important to look into the needs of this population during the  
58 lockdown as studies have shown that crises, quarantining and restrictions among  
59 school-age children have both short and long-term effect on their mental health which  
60

1  
2  
3 may affect the mental health of their parents(75)(76). Future studies should investigate  
4 the effect of remote education on the mental health of children taking into account the  
5 findings of Martin et. al who found that more than two hours of daily screen exposure  
6 can negatively affect the mental health of young children (77).  
7

8  
9 The prevailing assumption that a resurgence of COVID-19 cases is expected in the  
10 winter months shortly after schools re-open in September has led to the development  
11 of a range of preparedness and risk mitigation strategies (78). Recent modelling  
12 studies predict that school closures alone would only prevent 2–4% of deaths, which  
13 is significantly less than other social distancing interventions (79). Thus, whereas  
14 school closures present an apparently logical method of reducing virus transmission  
15 as evidenced from previous influenza outbreaks, they pose a dilemma for policy  
16 makers seeking measures to protect populations (79). This is reflected in the findings  
17 of our study which showed that one in five respondents may be unwilling to send their  
18 child back to school should schools re-open again for this academic year. Because  
19 school closures have a significant impact on public mental health and wellbeing (20)  
20 and may exacerbate inequalities (62, 63), this should be taken into account when  
21 considering future risk mitigation strategies to minimise virus transmission in the  
22 community and educational settings.  
23  
24

25  
26 The principal limitation of our study was the lack of follow-up, and not recording  
27 information about household income and demographic and lifestyle factors such as  
28 nutrition, smoking, use of alcohol and recreational drugs which may have enabled a  
29 fuller exploration of the factors that could influence the primary outcome measures  
30 examined. Further, the demographic profile of study participants largely consisted of  
31 white and employed female parents implying that this cross-section may not be  
32 representative of the wider UK parent population. We also acknowledged that since  
33 this was an online survey, we may have excluded parents with little or no digital  
34 access. These limitations restrict the generalisability of our findings to the wider  
35 population of parents across the UK. In spite of these limitations, our findings echo the  
36 results of other studies which show that lockdown measures are negatively impacting  
37 the public mental health of individuals across all age groups and may be significantly  
38 increasing the prevalence of social isolation and loneliness (18-20).  
39  
40

41  
42 Parents of school-age children remain an understudied population, especially in that  
43 they are raising the “next generation” of young adults. The mental health of parents  
44 during the lockdown is of major importance because it can significantly impact the  
45 psycho-social development and mental health of their children. The extraordinary  
46 measures introduced to control the COVID-19 pandemic have exacerbated pre-  
47 existing inequalities within society (80). When coupled with social distancing  
48 measures, the school closures have negatively impacted the mental health of school  
49 children and their parents and increased the prevalence of social isolation and  
50 loneliness in the community setting.  
51  
52

### 53 **Conclusions**

54 School closures and social distancing measures implemented during the first 100 days  
55 of the COVID-19 lockdown significantly impacted the daily routines of many people  
56 and influenced various aspects of government policy. Policy prescriptions and public  
57 health messaging should promote the adoption of good health-seeking self-care  
58 behaviours such as increased levels of physical activity and the maintenance of good  
59  
60



1  
2  
3 sleep hygiene practices to help prevent or reduce the risk of social isolation and  
4 loneliness, and this applies in particular where there is a single parent. Policy makers  
5 need to balance the impact of school closures on children and their families, and any  
6 future risk mitigation strategies should ideally not be a further disadvantage to the most  
7 vulnerable groups in society.  
8  
9

---

10  
11 **Acknowledgements:** The authors thank Mr David Collins (Head Teacher) and the  
12 Governing Board of Brackenbury Primary School for disseminating the survey  
13

14  
15 **Author Contributors:** All authors provided substantial contributions to the conception  
16 (AEO, CVH, HM), design (AEO, EB, CVH), acquisition (IW, AA, ER), and interpretation  
17 (EB, IW, HM, AM) of study data and approved the final version of the paper. AEO took  
18 the lead in planning the study with support from co-authors. EB carried out the data  
19 analysis with support from AA. AEO is the guarantor.  
20

21 **Data sharing statement:** The data that support the findings of this study are available  
22 from the corresponding author, AEO, upon reasonable request  
23

24 **Funding:** This research received no specific grant from any funding agency in the  
25 public, commercial or not-for-profit sectors. Austen El-Osta & Azeem Majeed are  
26 supported by the National Institute for Health Research (NIHR) Applied Research  
27 Collaboration (ARC) North West London. The views expressed are those of the  
28 authors and not necessarily those of the NHS or the NIHR or the Department of Health  
29 and Social Care  
30  
31

32 **Competing interests:** None declared.  
33

34 **Twitter:** Follow Austen El-Osta at @austenelosta and Imperial College London Self-  
35 Care Academic Research Unit (SCARU) at @ImperialSCARU  
36  
37

---

## 38 39 40 REFERENCES

- 41 1. UNESCO. COVID-19 Educational Disruption and Response 2020 [Available from:  
42 <https://en.unesco.org/covid19/educationresponse>.  
43
- 44 2. Cambridge Assessment International Education. Update from Cambridge International on  
45 May/June 2020 exams 2020 [Available from: [https://www.cambridgeinternational.org/news/news-  
47 details/view/update-from-cambridge-international-on-may-june-2020-exams-20200323/](https://www.cambridgeinternational.org/news/news-<br/>46 details/view/update-from-cambridge-international-on-may-june-2020-exams-20200323/).  
48
- 49 3. International Baccalaureate. May 2020 examinations will no longer be held. 2020.  
50
- 51 4. Unicef. Children In Lockdown: What Coronavirus Means For UK Children. 2020.  
52
- 53 5. The Telegraph. Two million people lose their jobs in record plunge 2020 [Available from:  
54 <https://www.telegraph.co.uk/business/2020/04/08/two-million-people-lose-jobs-record-plunge/>.  
55
- 56 6. Ipsos MORI. Public perceptions of health and social care in light of COVID-19. The Health  
57 Foundation; 2020.  
58
- 59 7. Carl Cullinane RM. COVID-19 and Social Mobility Impact Brief #1: School Shutdown. The Sutton  
60 Trust: The Sutton Trust; 2020.
8. Montacute R. Social Mobility and COVID-19. The Sutton Trust; 2020.
9. BBC News. Coronavirus: Further delays to children's food vouchers 2020 [Available from:  
<https://www.bbc.co.uk/news/education-52283067>.

10. National Institute for Health and Care Excellence. NICE impact children and young people's healthcare 2020 [Available from: <https://www.nice.org.uk/about/what-we-do/into-practice/measuring-the-use-of-nice-guidance/impact-of-our-guidance/niceimpact-children-and-young-peoples-healthcare>.
11. Goldenberg L-MMaG. Education in times of crisis: The potential implications of school closures for teachers and students. Chartered College of Teaching. 2020.
12. YoungMinds. Coronavirus: Impact on Young People with Mental Health Needs. 2020.
13. Jones WH, Freemon JE, Goswick RA. The persistence of loneliness: Self and other determinants. *Journal of Personality*. 1981;49(1):27-48.
14. Jones WH, Sansone C, Helm B. Loneliness and Interpersonal Judgments. *Personality and Social Psychology Bulletin*. 1983;9(3):437-41.
15. Qualter P, Brown SL, Munn P, Rotenberg KJ. Childhood loneliness as a predictor of adolescent depressive symptoms: an 8-year longitudinal study. *European Child & Adolescent Psychiatry*. 2010;19(6):493-501.
16. Schinka KC, Van Dulmen MH, Bossarte R, Swahn M. Association between loneliness and suicidality during middle childhood and adolescence: longitudinal effects and the role of demographic characteristics. *J Psychol*. 2012;146(1-2):105-18.
17. Vanhalst J, Klimstra TA, Luyckx K, Scholte RH, Engels RC, Goossens L. The interplay of loneliness and depressive symptoms across adolescence: exploring the role of personality traits. *J Youth Adolesc*. 2012;41(6):776-87.
18. WHO. Mental health and psychological resilience during the COVID-19 pandemic. 2020.
19. Louis Allwood AB. Covid-19: understanding inequalities in mental health during the pandemic. Centre for Mental Health,; 2020.
20. Oxford Uo. Co-Space Study: Supporting Parents, Adolescents and Children during Epidemics. 2020.
21. Hossain MM, Tasnim S, Sultana A, Faizah F, Mazumder H, Zou L, et al. Epidemiology of mental health problems in COVID-19: a review. *F1000Res*. 2020;9:636.
22. Rico-Urbe LA, Caballero FF, Martin-Maria N, Cabello M, Ayuso-Mateos JL, Miret M. Association of loneliness with all-cause mortality: A meta-analysis. *PLoS One*. 2018;13(1):e0190033.
23. Green BH, Copeland JR, Dewey ME, Sharma V, Saunders PA, Davidson IA, et al. Risk factors for depression in elderly people: a prospective study. *Acta Psychiatr Scand*. 1992;86(3):213-7.
24. Prince MJ, Harwood RH, Blizard RA, Thomas A, Mann AH. Social support deficits, loneliness and life events as risk factors for depression in old age. The Gospel Oak Project VI. *Psychol Med*. 1997;27(2):323-32.
25. Anderson CA, Harvey RJ. Brief report: Discriminating between problems in living: An examination of measures of depression, loneliness, shyness, and social anxiety. *Journal of Social and Clinical Psychology*. 1988;6(3-4):482-91.
26. Heinrich LM, Gullone E. The clinical significance of loneliness: A literature review. *Clinical psychology review*. 2006;26(6):695-718.
27. Bancroft J, Skrimshire A, Simkin S. The reasons people give for taking overdoses. *The British Journal of Psychiatry*. 1976;128(6):538-48.
28. Sorkin D, Rook KS, Lu JL. Loneliness, lack of emotional support, lack of companionship, and the likelihood of having a heart condition in an elderly sample. *Annals of Behavioral Medicine*. 2002;24(4):290-8.
29. Xia N, Li H. Loneliness, Social Isolation, and Cardiovascular Health. *Antioxid Redox Signal*. 2018;28(9):837-51.
30. Fox CM, Harper AP, Hyner GC, Lyle RM. Loneliness, emotional repression, marital quality, and major life events in women who develop breast cancer. *Journal of community health*. 1994;19(6):467-82.



- 1
- 2
- 3
- 4 31. Cohen-Mansfield J, Hazan H, Lerman Y, Shalom V. Correlates and predictors of loneliness in
- 5 older-adults: a review of quantitative results informed by qualitative insights. *Int Psychogeriatr*.
- 6 2016;28(4):557-76.
- 7 32. Wei M, Russell DW, Zakalik RA. Adult Attachment, Social Self-Efficacy, Self-Disclosure,
- 8 Loneliness, and Subsequent Depression for Freshman College Students: A Longitudinal Study. *Journal*
- 9 *of Counseling Psychology*. 2005;52(4):602-14.
- 10 33. Loades ME, Chatburn E, Higson-Sweeney N, Reynolds S, Shafran R, Brigden A, et al. Rapid
- 11 Systematic Review: The Impact of Social Isolation and Loneliness on the Mental Health of Children and
- 12 Adolescents in the Context of COVID-19. *J Am Acad Child Adolesc Psychiatry*. 2020:S0890-
- 13 8567(20)30337-3.
- 14 34. Perlman D, Peplau LA. Toward a social psychology of loneliness. *Personal relationships*.
- 15 1981;3:31-56.
- 16 35. Malcolm M, Frost H, Cowie J. Loneliness and social isolation causal association with health-
- 17 related lifestyle risk in older adults: a systematic review and meta-analysis protocol. *Syst Rev*.
- 18 2019;8(1):48-.
- 19 36. Office for National Statistics. Loneliness - What characteristics and circumstances are
- 20 associated with feeling lonely? United Kingdom: Office for National Statistics; 2018 [Available from:
- 21 [https://www.ons.gov.uk/peoplepopulationandcommunity/wellbeing/articles/lonelinesswhatcharact](https://www.ons.gov.uk/peoplepopulationandcommunity/wellbeing/articles/lonelinesswhatcharacteristicsandcircumstancesareassociatedwithfeelinglonely/2018-04-10)
- 22 [eristicsandcircumstancesareassociatedwithfeelinglonely/2018-04-10](https://www.ons.gov.uk/peoplepopulationandcommunity/wellbeing/articles/lonelinesswhatcharacteristicsandcircumstancesareassociatedwithfeelinglonely/2018-04-10).
- 23 37. Iparraguirre J. Predicting the prevalence of loneliness at older ages London, United Kingdom:
- 24 Age UK; 2016 [Available from: [https://www.ageuk.org.uk/globalassets/age-uk/documents/reports-](https://www.ageuk.org.uk/globalassets/age-uk/documents/reports-and-publications/reports-and-briefings/health--wellbeing/predicting_the_prevalence_of_loneliness_at_older_ages.pdf)
- 25 [and-publications/reports-and-briefings/health--](https://www.ageuk.org.uk/globalassets/age-uk/documents/reports-and-publications/reports-and-briefings/health--wellbeing/predicting_the_prevalence_of_loneliness_at_older_ages.pdf)
- 26 [wellbeing/predicting\\_the\\_prevalence\\_of\\_loneliness\\_at\\_older\\_ages.pdf](https://www.ageuk.org.uk/globalassets/age-uk/documents/reports-and-publications/reports-and-briefings/health--wellbeing/predicting_the_prevalence_of_loneliness_at_older_ages.pdf).
- 27 38. Valtorta NK, Kanaan M, Gilbody S, Hanratty B. Loneliness, social isolation and social
- 28 relationships: what are we measuring? A novel framework for classifying and comparing tools. *BMJ*
- 29 *Open*. 2016;6(4):e010799.
- 30 39. Office for National Statistics. Recommended national indicators of loneliness United Kingdom:
- 31 Office for National Statistics; 2018 [Available from:
- 32 [https://www.ons.gov.uk/peoplepopulationandcommunity/wellbeing/compendium/nationalmeasure](https://www.ons.gov.uk/peoplepopulationandcommunity/wellbeing/compendium/nationalmeasure-mentofloneliness/2018/recommendednationalindicatorsof Loneliness)
- 33 [mentofloneliness/2018/recommendednationalindicatorsofloneliness](https://www.ons.gov.uk/peoplepopulationandcommunity/wellbeing/compendium/nationalmeasure-mentofloneliness/2018/recommendednationalindicatorsof Loneliness).
- 34 40. Pang HB, M ; Gnani, S; Majeed, A; El-Osta, A. Leveraging Community Assets to Tackle Social
- 35 Isolation and Loneliness. *Imperial College London Primary Care Blog*. 2020.
- 36 41. O'Rourke HM, Collins L, Sidani S. Interventions to address social connectedness and loneliness
- 37 for older adults: a scoping review. *BMC Geriatr*. 2018;18(1):214.
- 38 42. Gardiner C, Geldenhuys G, Gott M. Interventions to reduce social isolation and loneliness
- 39 among older people: an integrative review. *Health Soc Care Community*. 2018;26(2):147-57.
- 40 43. Jopling K. Promising approaches to reducing loneliness and isolation in later life United
- 41 Kingdom: Age UK; 2015 [Available from: [https://www.campaigntoendloneliness.org/wp-](https://www.campaigntoendloneliness.org/wp-content/uploads/Promising-approaches-to-reducing-loneliness-and-isolation-in-later-life.pdf)
- 42 [content/uploads/Promising-approaches-to-reducing-loneliness-and-isolation-in-later-life.pdf](https://www.campaigntoendloneliness.org/wp-content/uploads/Promising-approaches-to-reducing-loneliness-and-isolation-in-later-life.pdf).
- 43 44. Merchant RM, Lurie N. Social media and emergency preparedness in response to novel
- 44 coronavirus. *JAMA*. 2020.
- 45 45. Bao Y, Sun Y, Meng S, Shi J, Lu L. 2019-nCoV epidemic: address mental health care to empower
- 46 society. *Lancet*. 2020;395(10224):e37-e8.
- 47 46. Ho CS, Chee CY, Ho RC. Mental Health Strategies to Combat the Psychological Impact of
- 48 COVID-19 Beyond Paranoia and Panic. *Ann Acad Med Singapore*. 2020;49(3):155-60.
- 49 47. Margalit M. Lonely children and adolescents: Self perceptions, social exclusion and Hope2010.
- 50 48. Zhai Y, Du X. Mental health care for international Chinese students affected by the COVID-19
- 51 outbreak. *Lancet Psychiatry*. 2020;7(4):e22.
- 52 49. Armitage R, Nellums LB. COVID-19 and the consequences of isolating the elderly. *Lancet Public*
- 53 *Health*. 2020;5(5):e256-e.
- 54
- 55
- 56
- 57
- 58
- 59
- 60

- 1  
2  
3  
4  
5  
6  
7  
8  
9  
10  
11  
12  
13  
14  
15  
16  
17  
18  
19  
20  
21  
22  
23  
24  
25  
26  
27  
28  
29  
30  
31  
32  
33  
34  
35  
36  
37  
38  
39  
40  
41  
42  
43  
44  
45  
46  
47  
48  
49  
50  
51  
52  
53  
54  
55  
56  
57  
58  
59  
60
50. Hughes ME, Waite LJ, Hawkey LC, Cacioppo JT. A Short Scale for Measuring Loneliness in Large Surveys: Results From Two Population-Based Studies. *Research on Aging*. 2004;26(6):655-72.
51. Office for National Statistics. Recommended national indicators of loneliness 2020 [Available from: <https://www.ons.gov.uk/peoplepopulationandcommunity/wellbeing/compendium/nationalmeasurements/loneliness/2018/recommendednationalindicatorsof Loneliness#:~:text=Direct%20measure,ever%E2%80%9D%20or%20%22Never%22.>
52. Jakobsen JC, Gluud C, Winkel P, Lange T, Wetterslev J. The thresholds for statistical and clinical significance - a five-step procedure for evaluation of intervention effects in randomised clinical trials. *BMC Med Res Methodol*. 2014;14:34.
53. Jakobsen JC, Wetterslev J, Winkel P, Lange T, Gluud C. Thresholds for statistical and clinical significance in systematic reviews with meta-analytic methods. *BMC Med Res Methodol*. 2014;14:120.
54. The Lancet Infectious D. The intersection of COVID-19 and mental health. *The Lancet Infectious Diseases*. 2020;20(11):1217.
55. Pfefferbaum B, North CS. Mental Health and the Covid-19 Pandemic. *N Engl J Med*. 2020;383(6):510-2.
56. Vindegaard N, Benros ME. COVID-19 pandemic and mental health consequences: Systematic review of the current evidence. *Brain Behav Immun*. 2020;89:531-42.
57. Torales J, O'Higgins M, Castaldelli-Maia JM, Ventriglio A. The outbreak of COVID-19 coronavirus and its impact on global mental health. *Int J Soc Psychiatry*. 2020;66(4):317-20.
58. Oxford Uo. Children show increase in mental health difficulties over COVID-19 lockdown. 2020.
59. Lee J. Mental health effects of school closures during COVID-19. *Lancet Child Adolesc Health*. 2020;4(6):421.
60. Rahman LJF. Lockdown living Housing quality across the generations. Resolution Foundation. 2020.
61. Education Endowment Foundation. The Attainment Gap. 2017.
62. Foundation EE. Impact of school closures on the attainment gap. 2020.
63. Studies Iff. Institute for Fiscal Studies. Poverty, inequality and living standards 2013.
64. Rebecca Montacute CC. How parents use financial and cultural resources to boost their children's chances of success. The Sutton Trust; 2018.
65. Ben Simon E, Walker MP. Sleep loss causes social withdrawal and loneliness. *Nature Communications*. 2018;9(1):3146.
66. Hawkey LC, Thisted RA, Cacioppo JT. Loneliness predicts reduced physical activity: cross-sectional & longitudinal analyses. *Health Psychol*. 2009;28(3):354-63.
67. Kline CE. The bidirectional relationship between exercise and sleep: Implications for exercise adherence and sleep improvement. *Am J Lifestyle Med*. 2014;8(6):375-9.
68. Shvedko AV, Thompson JL, Greig CA, Whittaker AC. Physical Activity Intervention for Loneliness (PAIL) in community-dwelling older adults: protocol for a feasibility study. *Pilot Feasibility Stud*. 2018;4:187.
69. Pels F, Kleinert J. Loneliness and physical activity: A systematic review. *International Review of Sport and Exercise Psychology*. 2016;9(1):231-60.
70. Harandi TF, Taghinasab MM, Nayeri TD. The correlation of social support with mental health: A meta-analysis. *Electron Physician*. 2017;9(9):5212-22.
71. Elbe A-M, Lyhne SN, Madsen EE, Krstrup P. Is regular physical activity a key to mental health? Commentary on "Association between physical exercise and mental health in 1.2 million individuals in the USA between 2011 and 2015: A cross-sectional study", by Chekroud et al., published in *Lancet Psychiatry*. *J Sport Health Sci*. 2019;8(1):6-7.
72. Tough H, Siegrist J, Fekete C. Social relationships, mental health and wellbeing in physical disability: a systematic review. *BMC Public Health*. 2017;17(1):414.

- 1  
2  
3 73. Torales J, O'Higgins M, Castaldelli-Maia JM, Ventriglio A. The outbreak of COVID-19  
4 coronavirus and its impact on global mental health. *International Journal of Social*  
5 *Psychiatry*.0(0):0020764020915212.  
6  
7 74. Lima CKT, Carvalho PMdM, Lima IdAAS, Nunes JVAdO, Saraiva JS, de Souza RI, et al. The  
8 emotional impact of Coronavirus 2019-nCoV (new Coronavirus disease). *Psychiatry Res.*  
9 *2020;287:112915-*.  
10 75. Liu JJ, Bao Y, Huang X, Shi J, Lu L. Mental health considerations for children quarantined  
11 because of COVID-19. *Lancet Child Adolesc Health.* 2020;4(5):347-9.  
12 76. Twenge JM, Campbell WK. Associations between screen time and lower psychological well-  
13 being among children and adolescents: Evidence from a population-based study. *Prev Med Rep.*  
14 *2018;12:271-83.*  
15 77. Martin K, editor *Electronic Overload: The Impact of Excessive Screen Use on Child and*  
16 *Adolescent Health and Wellbeing*2011.  
17 78. Sciences TAoM. *Preparing for a challenging winter 2020/21.* 2020.  
18 79. Viner RM, Russell SJ, Croker H, Packer J, Ward J, Stansfield C, et al. School closure and  
19 management practices during coronavirus outbreaks including COVID-19: a rapid systematic review.  
20 *The Lancet Child & Adolescent Health.* 2020;4(5):397-404.  
21 80. Coronini-Cronberg S, John Maile E, Majeed A. Health inequalities: the hidden cost of COVID-  
22 19 in NHS hospital trusts? *J R Soc Med.* 2020;113(5):179-84.  
23  
24  
25  
26  
27  
28  
29  
30  
31  
32  
33  
34  
35  
36  
37  
38  
39  
40  
41  
42  
43  
44  
45  
46  
47  
48  
49  
50  
51  
52  
53  
54  
55  
56  
57  
58  
59  
60

**Supplementary table 1: Prevalence of low, moderate and high levels of loneliness (UCLATILS and DMOL) in relation to respondent characteristics**

|                                                     | Total |         | UCL three-item loneliness scale (UCLATILS) |                   |               |         |             |                   | ONS Direct measure of loneliness (DMOL) |         |        |     |        |     |        |
|-----------------------------------------------------|-------|---------|--------------------------------------------|-------------------|---------------|---------|-------------|-------------------|-----------------------------------------|---------|--------|-----|--------|-----|--------|
|                                                     | N     | (%)     | No<br>n (%)                                | Moderate<br>n (%) | High<br>n (%) | p-value | No<br>n (%) | Moderate<br>n (%) | High<br>n (%)                           | p value |        |     |        |     |        |
| <b>PARENT CHARACTERISTICS</b>                       |       |         |                                            |                   |               |         |             |                   |                                         |         |        |     |        |     |        |
| <b>How many children do you have</b>                |       |         |                                            |                   |               | 0.35    |             |                   |                                         |         |        |     | 0.24   |     |        |
| 1                                                   | 251   | (100.0) | 80                                         | (31.9)            | 67            | (26.7)  | 104         | (41.4)            |                                         | 126     | (50.2) | 89  | (35.5) | 36  | (14.3) |
| 2                                                   | 649   | (100.0) | 222                                        | (34.2)            | 184           | (28.4)  | 243         | (37.4)            |                                         | 351     | (54.7) | 222 | (34.6) | 69  | (10.7) |
| 3                                                   | 244   | (100.0) | 86                                         | (35.2)            | 70            | (28.7)  | 88          | (36.1)            |                                         | 130     | (54.2) | 73  | (30.4) | 37  | (15.4) |
| 4                                                   | 50    | (100.0) | 14                                         | (28.0)            | 11            | (22.0)  | 25          | (50.0)            |                                         | 23      | (46.9) | 18  | (36.7) | 8   | (16.3) |
| 5+                                                  | 18    | (100.0) | 5                                          | (27.8)            | 2             | (11.1)  | 11          | (61.1)            |                                         | 7       | (38.9) | 6   | (33.3) | 5   | (27.8) |
| <b>Does partner work?</b>                           |       |         |                                            |                   |               | 0.09    |             |                   |                                         |         |        |     |        |     | <0.001 |
| Yes                                                 | 995   | (100.0) | 348                                        | (35.0)            | 284           | (28.5)  | 363         | (36.5)            |                                         | 560     | (56.9) | 318 | (32.3) | 107 | (10.9) |
| No                                                  | 146   | (100.0) | 43                                         | (29.5)            | 36            | (24.7)  | 67          | (45.9)            |                                         | 56      | (38.9) | 56  | (38.9) | 32  | (22.2) |
| <b>Key worker</b>                                   |       |         |                                            |                   |               | 0.07    |             |                   |                                         |         |        |     |        |     | 0.03   |
| Yes                                                 | 213   | (100.0) | 77                                         | (36.2)            | 65            | (30.5)  | 71          | (33.3)            |                                         | 121     | (57.6) | 69  | (32.9) | 20  | (9.5)  |
| No                                                  | 394   | (100.0) | 125                                        | (31.7)            | 100           | (25.4)  | 169         | (42.9)            |                                         | 201     | (51.1) | 124 | (31.6) | 68  | (17.3) |
| <b>Physical activity levels before the lockdown</b> |       |         |                                            |                   |               | 0.08    |             |                   |                                         |         |        |     |        |     | 0.02   |
| Low                                                 | 63    | (100.0) | 27                                         | (42.9)            | 13            | (20.6)  | 23          | (36.5)            |                                         | 41      | (66.1) | 14  | (22.6) | 7   | (11.3) |
| Medium                                              | 626   | (100.0) | 215                                        | (34.4)            | 186           | (29.7)  | 225         | (35.9)            |                                         | 347     | (56.2) | 196 | (31.7) | 75  | (12.1) |
| High                                                | 505   | (100.0) | 161                                        | (31.9)            | 129           | 25.5)   | 215         | (42.6)            |                                         | 241     | (48.0) | 192 | (38.3) | 69  | (13.8) |
| <b>Videocall reduces SI</b>                         |       |         |                                            |                   |               | <0.001  |             |                   |                                         |         |        |     |        |     | 0.02   |
| Yes                                                 | 825   | (100.0) | 245                                        | (29.7)            | 238           | (28.9)  | 342         | (41.5)            |                                         | 411     | (50.2) | 296 | (36.2) | 111 | (13.6) |
| No                                                  | 375   | (100.0) | 159                                        | (42.4)            | 91            | (24.3)  | 125         | (33.3)            |                                         | 219     | (59.0) | 110 | (29.7) | 42  | (11.3) |
| <b>Videocall reduces loneliness</b>                 |       |         |                                            |                   |               | <0.001  |             |                   |                                         |         |        |     |        |     | <0.001 |
| Yes                                                 | 712   | (100.0) | 194                                        | (27.3)            | 204           | (28.7)  | 314         | (44.1)            |                                         | 339     | (48.0) | 266 | (37.6) | 102 | (14.4) |
| No                                                  | 464   | (100.0) | 201                                        | (43.3)            | 121           | (26.1)  | 142         | 30.6)             |                                         | 285     | (62.0) | 128 | (27.8) | 47  | (10.2) |
| <b>Depression due to lockdown</b>                   |       |         |                                            |                   |               | <0.001  |             |                   |                                         |         |        |     |        |     | <0.001 |
| Yes                                                 | 523   | (100.0) | 82                                         | (15.7)            | 124           | (23.7)  | 317         | (60.6)            |                                         | 151     | (29.0) | 236 | (45.3) | 134 | (25.7) |

1  
2  
3  
4  
5  
6  
7  
8  
9  
10  
11  
12  
13  
14  
15  
16  
17  
18  
19  
20  
21  
22  
23  
24  
25  
26  
27  
28  
29  
30  
31  
32  
33  
34  
35  
36  
37  
38  
39  
40  
41  
42  
43  
44  
45  
46

|                                               | Total |         | UCL three-item loneliness scale (UCLATILS) |        |     |        |     |        | ONS Direct measure of loneliness (DMOL) |     |        |     |        |     |        |         |
|-----------------------------------------------|-------|---------|--------------------------------------------|--------|-----|--------|-----|--------|-----------------------------------------|-----|--------|-----|--------|-----|--------|---------|
|                                               | N     | (%)     | n                                          | (%)    | n   | (%)    | n   | (%)    | p-value                                 | n   | (%)    | n   | (%)    | n   | (%)    | p value |
| No                                            | 672   | (100.0) | 316                                        | (47.0) | 207 | (30.8) | 149 | (22.2) |                                         | 477 | (72.1) | 166 | (25.1) | 19  | (2.9)  |         |
| <b>Cancelation of the exams</b>               |       |         |                                            |        |     |        |     |        | 0.77                                    |     |        |     |        |     |        | 0.04    |
| Unhappy                                       | 276   | (100.0) | 89                                         | (32.3) | 77  | (27.9) | 110 | (39.9) |                                         | 126 | (45.8) | 104 | (37.8) | 45  | (16.4) |         |
| Neutral                                       | 793   | (100.0) | 267                                        | (33.7) | 215 | (27.1) | 311 | (39.2) |                                         | 429 | (54.8) | 260 | (33.2) | 94  | (12.0) |         |
| Happy                                         | 130   | (100.0) | 49                                         | (37.7) | 37  | (28.5) | 44  | (33.9) |                                         | 76  | (58.9) | 41  | (31.8) | 12  | (9.3)  |         |
| <b>Preference of online exams</b>             |       |         |                                            |        |     |        |     |        | 0.38                                    |     |        |     |        |     |        | 0.86    |
| Yes                                           | 494   | (100.0) | 158                                        | (32.0) | 140 | (28.3) | 196 | (39.7) |                                         | 261 | (53.3) | 164 | (33.5) | 65  | (13.3) |         |
| No                                            | 644   | (100.0) | 231                                        | (35.9) | 176 | (27.3) | 237 | (36.8) |                                         | 347 | (54.6) | 211 | (33.2) | 78  | (12.3) |         |
| <b>Sending child to school after lockdown</b> |       |         |                                            |        |     |        |     |        | 0.20                                    |     |        |     |        |     |        | 0.09    |
| Very unhappy                                  | 100   | (100.0) | 39                                         | (39.0) | 23  | (23.0) | 38  | (38.0) |                                         | 54  | (55.7) | 28  | (28.9) | 15  | (15.5) |         |
| Unhappy                                       | 158   | (100.0) | 59                                         | (37.3) | 48  | (30.4) | 51  | (32.3) |                                         | 89  | (58.2) | 48  | (31.4) | 16  | (10.5) |         |
| Neither unhappy nor happy                     | 230   | (100.0) | 86                                         | (37.4) | 64  | (27.8) | 80  | (34.8) |                                         | 130 | (57.0) | 69  | (30.3) | 29  | (12.7) |         |
| Happy                                         | 363   | (100.0) | 108                                        | (29.8) | 95  | (26.2) | 160 | (44.1) |                                         | 170 | (46.8) | 149 | (41.0) | 44  | (12.1) |         |
| Very happy                                    | 353   | (100.0) | 115                                        | (32.6) | 101 | (28.6) | 137 | (38.8) |                                         | 193 | (54.8) | 111 | (31.5) | 48  | (13.6) |         |
| <b>CHILD CHARACTERISTICS</b>                  |       |         |                                            |        |     |        |     |        |                                         |     |        |     |        |     |        |         |
| <b>Type of school</b>                         |       |         |                                            |        |     |        |     |        | 0.38                                    |     |        |     |        |     |        | 0.07    |
| State school                                  | 1082  | (100.0) | 356                                        | (32.9) | 302 | (27.9) | 424 | (39.2) |                                         | 559 | (52.2) | 366 | (34.2) | 146 | (13.6) |         |
| Private school                                | 128   | (100.0) | 50                                         | (39.1) | 32  | (25.0) | 46  | (35.9) |                                         | 77  | (60.6) | 41  | (32.3) | 9   | (7.1)  |         |
| <b>Private tuition</b>                        |       |         |                                            |        |     |        |     |        | 0.94                                    |     |        |     |        |     |        | 0.08    |
| Yes                                           | 115   | (100.0) | 40                                         | (34.8) | 32  | (27.8) | 43  | (37.4) |                                         | 70  | (60.9) | 37  | (32.2) | 8   | (7.0)  |         |
| No                                            | 1095  | (100.0) | 366                                        | (33.4) | 302 | (27.6) | 427 | (39.0) |                                         | 566 | (52.3) | 371 | (34.3) | 146 | (13.5) |         |
| <b>Time spent studying</b>                    |       |         |                                            |        |     |        |     |        | 0.04                                    |     |        |     |        |     |        | <0.001  |
| ≤2 hours                                      | 439   | (100.0) | 130                                        | (29.6) | 112 | (25.5) | 197 | (44.9) |                                         | 195 | (44.8) | 157 | (36.1) | 83  | (19.1) |         |
| 2-4 hours                                     | 365   | (100.0) | 124                                        | (34.0) | 109 | (29.9) | 132 | (36.2) |                                         | 202 | (55.8) | 119 | (32.9) | 41  | (11.3) |         |
| ≥4 hours                                      | 386   | (100.0) | 146                                        | (37.8) | 108 | (28.0) | 132 | (34.2) |                                         | 231 | (60.5) | 124 | (32.5) | 27  | (7.1)  |         |
| <b>Boredom</b>                                |       |         |                                            |        |     |        |     |        | <0.001                                  |     |        |     |        |     |        | <0.001  |

|                                                                  | Total |         | UCL three-item loneliness scale (UCLATILS) |        |          |        |      |        | ONS Direct measure of loneliness (DMOL) |        |          |        |      |        |         |
|------------------------------------------------------------------|-------|---------|--------------------------------------------|--------|----------|--------|------|--------|-----------------------------------------|--------|----------|--------|------|--------|---------|
|                                                                  | N     | (%)     | No                                         |        | Moderate |        | High |        | No                                      |        | Moderate |        | High |        | p value |
|                                                                  |       |         | n                                          | (%)    | n        | (%)    | n    | (%)    | n                                       | (%)    | n        | (%)    | n    | (%)    | p value |
| Low                                                              | 74    | (100.0) | 40                                         | (54.1) | 16       | (21.6) | 18   | (24.3) | 50                                      | (68.5) | 18       | (24.7) | 5    | (6.8)  |         |
| Medium                                                           | 396   | (100.0) | 165                                        | (41.7) | 117      | (29.5) | 114  | (28.8) | 250                                     | (63.5) | 116      | (29.4) | 28   | (7.1)  |         |
| High                                                             | 734   | (100.0) | 200                                        | (27.2) | 199      | (27.1) | 335  | (45.6) | 334                                     | (45.9) | 273      | (37.6) | 120  | (16.5) |         |
| <b>Stress</b>                                                    |       |         |                                            |        |          |        |      |        |                                         |        |          |        |      |        | <0.001  |
| Low                                                              | 213   | (100.0) | 115                                        | (54.0) | 54       | (25.4) | 44   | (20.7) | 159                                     | (75.7) | 41       | (19.5) | 10   | (4.8)  |         |
| Medium                                                           | 531   | (100.0) | 190                                        | (35.8) | 158      | (29.8) | 183  | (34.5) | 308                                     | (58.6) | 177      | (33.7) | 41   | (7.8)  |         |
| High                                                             | 457   | (100.0) | 98                                         | (21.4) | 120      | (26.3) | 239  | (52.3) | 166                                     | (36.4) | 188      | (41.2) | 102  | (22.4) |         |
| <b>Signs of depression</b>                                       |       |         |                                            |        |          |        |      |        |                                         |        |          |        |      |        | <0.001  |
| Yes                                                              | 146   | (100.0) | 30                                         | (20.5) | 35       | (24.0) | 81   | (55.5) | 54                                      | (37.0) | 59       | (40.4) | 33   | (22.6) |         |
| No                                                               | 297   | (100.0) | 128                                        | (43.1) | 85       | (28.6) | 84   | (28.3) | 194                                     | (65.8) | 87       | (29.5) | 14   | (4.7)  |         |
| <b>Children complaining of feeling social isolated or lonely</b> |       |         |                                            |        |          |        |      |        |                                         |        |          |        |      |        | <0.001  |
| Yes                                                              | 521   | (100.0) | 85                                         | (16.3) | 137      | (26.3) | 299  | (57.4) | 170                                     | (32.8) | 231      | (44.6) | 117  | (22.6) |         |
| No                                                               | 685   | (100.0) | 321                                        | (46.9) | 196      | (28.6) | 168  | (24.5) | 466                                     | (68.9) | 175      | (25.9) | 35   | (5.2)  |         |
| <b>Physical activity levels before the lockdown</b>              |       |         |                                            |        |          |        |      |        |                                         |        |          |        |      |        | 0.27    |
| Low                                                              | 17    | (100.0) | 3                                          | (17.6) | 6        | (35.3) | 8    | (47.1) | 10                                      | (62.5) | 3        | (18.8) | 3    | (18.8) |         |
| Medium                                                           | 281   | (100.0) | 108                                        | (38.4) | 77       | (27.4) | 96   | (34.2) | 159                                     | (57.0) | 86       | (30.8) | 34   | (12.2) |         |
| High                                                             | 901   | (100.0) | 290                                        | (32.2) | 247      | (27.4) | 364  | (40.4) | 462                                     | (51.7) | 317      | (35.5) | 115  | (12.9) |         |
| <b>Physical activity levels during the lockdown</b>              |       |         |                                            |        |          |        |      |        |                                         |        |          |        |      |        | 0.44    |
| Low                                                              | 174   | (100.0) | 56                                         | (32.2) | 41       | (23.6) | 77   | (44.3) | 83                                      | (48.3) | 66       | (38.4) | 23   | (13.4) |         |
| Medium                                                           | 715   | (100.0) | 231                                        | (32.3) | 203      | (28.4) | 281  | (39.3) | 376                                     | (53.0) | 246      | (34.6) | 88   | (12.4) |         |
| High                                                             | 304   | (100.0) | 111                                        | (36.5) | 85       | (28.0) | 108  | (35.5) | 168                                     | (55.8) | 92       | (30.6) | 41   | (13.6) |         |
| <b>Readiness to undertake exams</b>                              |       |         |                                            |        |          |        |      |        |                                         |        |          |        |      |        | <0.001  |
| Ready                                                            | 217   | (100.0) | 83                                         | (38.2) | 51       | (23.5) | 83   | (38.2) | 285                                     | (46.2) | 233      | (37.8) | 99   | (16.0) |         |
| Neutral                                                          | 279   | (100.0) | 123                                        | (44.1) | 71       | (25.4) | 85   | (30.5) | 184                                     | (66.2) | 77       | (27.7) | 17   | (6.1)  |         |
| Unready                                                          | 627   | (100.0) | 178                                        | (28.4) | 186      | (29.7) | 263  | (41.9) | 126                                     | (58.3) | 65       | (30.1) | 25   | (11.6) |         |

1  
2  
3  
4  
5  
6  
7  
8  
9  
10  
11  
12  
13  
14  
15  
16  
17  
18  
19  
20  
21  
22  
23  
24  
25  
26  
27  
28  
29  
30  
31  
32  
33  
34  
35  
36  
37  
38  
39  
40  
41  
42  
43  
44  
45  
46

### Appendix 1: Checklist for Reporting Results of Internet E-Surveys (CHERRIES)

| <i>Item Category</i>                                                                 | <i>Checklist Item</i>            | <i>Page Number</i> | <i>Description</i>                                                                                                                                                                                                                                                                                                                                                                                                                                                                                                                                                                                                                                                                                                                                                                                  |
|--------------------------------------------------------------------------------------|----------------------------------|--------------------|-----------------------------------------------------------------------------------------------------------------------------------------------------------------------------------------------------------------------------------------------------------------------------------------------------------------------------------------------------------------------------------------------------------------------------------------------------------------------------------------------------------------------------------------------------------------------------------------------------------------------------------------------------------------------------------------------------------------------------------------------------------------------------------------------------|
| Design                                                                               | Study design                     | 4                  | The target population were adult (aged 18 years and over) parents and legal guardians of children who were attending primary or secondary education in the UK.                                                                                                                                                                                                                                                                                                                                                                                                                                                                                                                                                                                                                                      |
| IRB (Institutional Review Board) approval and informed consent process               | IRB approval                     | 6                  | The study was given ethical approval by the Head of Imperial College London PCPH Department, Professor Azeem Majeed, and by the Joint Research Compliance Office under the Imperial College Research Ethics Committee process (approval 20IC5978 ICREC HOD JRCO)                                                                                                                                                                                                                                                                                                                                                                                                                                                                                                                                    |
|                                                                                      | Informed consent                 | 4 and 5            | The link to the Participant Information Sheet was accessible on the eSurvey page and sent to heads of schools who were contacted. The PIS included information regarding the study such as the protection of the participants' personal data, their right to withdraw from the study at any time, the length of time of the survey, which data were stored, where and for how long, who the investigator was, and the purpose of the study. They were informed this was a voluntary survey without any monetary incentives but with offering the possibility to access the results and underlying the potential collective benefits of taking parts in terms of knowledge and policies. The first question of the survey asked participants to confirm their consent to participate in the eSurvey. |
|                                                                                      | Data protection                  | 5                  | The data collected were stored on the Imperial secure database and only the team researchers could access the eSurvey results.                                                                                                                                                                                                                                                                                                                                                                                                                                                                                                                                                                                                                                                                      |
| Development and pre-testing                                                          | Development and testing          | 4 and 5            | The study protocol and online survey were developed in collaboration with the Governing Board of Brackenbury Primary School in the London Borough of Hammersmith & Fulham. The online survey technical functionality was tested before being published.                                                                                                                                                                                                                                                                                                                                                                                                                                                                                                                                             |
| Recruitment process and description of the sample having access to the questionnaire | Open survey versus closed survey | 4                  | This was an open survey using a snowball sampling.                                                                                                                                                                                                                                                                                                                                                                                                                                                                                                                                                                                                                                                                                                                                                  |
|                                                                                      | Contact mode                     | 4                  | Part of the potentially eligible participants received an invitation email from the head teacher of schools where study information was disseminated including the Participant Information Sheet and link to the survey. The researchers' personal and professional networks were also mobilized through email and other messaging applications such as WhatsApp to respond and further disseminate the eSurvey among eligible participants.                                                                                                                                                                                                                                                                                                                                                        |
|                                                                                      | Advertising the survey           | 4                  | The study was advertised through head teachers of schools and researchers' networks                                                                                                                                                                                                                                                                                                                                                                                                                                                                                                                                                                                                                                                                                                                 |
| Survey                                                                               | Web/E-mail                       | 4                  | The survey was hosted by the Imperial College Qualtrics platform.                                                                                                                                                                                                                                                                                                                                                                                                                                                                                                                                                                                                                                                                                                                                   |



|                                                      |                                          |         |                                                                                                                                                                                                                                                                                                        |
|------------------------------------------------------|------------------------------------------|---------|--------------------------------------------------------------------------------------------------------------------------------------------------------------------------------------------------------------------------------------------------------------------------------------------------------|
| Administration                                       | Context                                  | p 10    | The Head Teacher of Brackenbury Primary School disseminated the survey to parents of that school to give parents the opportunity to reflect on an issue that is important to them given the nature of the study. This was a 'right-in-time' study earmarked for recruitment <i>during</i> the lockdown |
|                                                      | Mandatory/voluntary                      | 5       | This was a voluntary survey                                                                                                                                                                                                                                                                            |
|                                                      | Incentives                               | 4 and 5 | Participants were informed in the PIC that no monetary incentives were offered but non-monetary incentives such as the possibility to access the results and the potential collective benefits of taking parts in terms of knowledge and policies were mentioned.                                      |
|                                                      | Time/Date                                | 4       | The survey was accessible for a period of 9 weeks from 14 May 2020 to 4 July 2020.                                                                                                                                                                                                                     |
|                                                      | Randomization of items or questionnaires | -       | No randomization of items was used.                                                                                                                                                                                                                                                                    |
|                                                      | Adaptive questioning                     | -       | No adaptive questioning of items was used.                                                                                                                                                                                                                                                             |
|                                                      | Number of Items                          | 5       | The survey comprised a total of 51 questions.                                                                                                                                                                                                                                                          |
|                                                      | Number of screens (pages)                | 5       | All questions were displayed on one page and was accessible using a personal computer or smartphone.                                                                                                                                                                                                   |
|                                                      | Completeness check                       | 4       | Most items provided a non-response option such as "not applicable" or "rather not say", though not all. Selection of a response option to questions was not forced but were all fully completed. Analysis was conducted on fully completed questionnaires.                                             |
|                                                      | Review step                              | 5       | Participants could review their answers before submitting them.                                                                                                                                                                                                                                        |
| Response rates                                       | Unique site visitor                      | -       | Not applicable as response rates were not calculated.                                                                                                                                                                                                                                                  |
|                                                      | View rate                                | -       | Not applicable as response rates were not calculated.                                                                                                                                                                                                                                                  |
|                                                      | Participation rate                       | -       | Not applicable as response rates were not calculated.                                                                                                                                                                                                                                                  |
|                                                      | Completion rate                          | -       | Not applicable as response rates were not calculated.                                                                                                                                                                                                                                                  |
| Preventing multiple entries from the same individual | Cookies used                             | -       | No cookies were used.                                                                                                                                                                                                                                                                                  |
|                                                      | IP check                                 | -       | Qualtrics registered the IP address of respondents and did not allow a respondent for completing another survey from the same IP address for a period of one week.                                                                                                                                     |
|                                                      | Log file analysis                        | -       | No log files analysis.                                                                                                                                                                                                                                                                                 |
|                                                      | Registration                             | -       | No registration.                                                                                                                                                                                                                                                                                       |
| Analysis                                             | Handling of incomplete questionnaires    | -       | Only completed questionnaires were included in the final dataset.                                                                                                                                                                                                                                      |

|  |                                                     |   |                |
|--|-----------------------------------------------------|---|----------------|
|  | Questionnaires submitted with an atypical timestamp | - | Not applicable |
|  | Statistical correction                              | - | None           |

This checklist has been adapted from Eysenbach G. Improving the quality of Web surveys: the Checklist for Reporting Results of Internet E-Surveys (CHERRIES). J Med Internet Res. 2004 Sep 29;6(3):e34 [erratum in J Med Internet Res. 2012; 14(1): e8.]. Article available at <https://www.jmir.org/2004/3/e34/>; erratum available <https://www.jmir.org/2012/1/e8/>. Copyright ©Gunther Eysenbach. Originally published in the [Journal of Medical Internet Research](#), 29.9.2004 and 04.01.2012.

This is an open-access article distributed under the terms of the Creative Commons Attribution License (<https://creativecommons.org/licenses/by/2.0/>), which permits unrestricted use, distribution, and reproduction in any medium, provided the original work, first published in the Journal of Medical Internet Research, is properly cited.



Supplement: bmjopen-2020-043397.draft_revisions.pdf [file bmjopen-2020-043397.draft_revisions.pdf]
