# Supplementary material for: How is the COVID-19 lockdown impacting the mental health of parents of school-age children in the UK? A cross-sectional online survey
Source: PubMed Central journal article supplement — BMJ Open. 2021 May 11;11(5):e043397. doi: 10.1136/bmjopen-2020-043397 (PMC8117442; doi:10.1136/bmjopen-2020-043397), 2021-05-11
Supplement: bmjopen-2020-043397supp001.pdf [file bmjopen-2020-043397supp001.pdf]

**Supplementary table 1: Prevalence of low, moderate and high levels of loneliness (UCLATILS and DMOL) in relation to respondent characteristics**

|                                                     | Total |         | UCL three-item loneliness scale (UCLATILS) |                   |               |             | p-value | ONS Direct measure of loneliness (DMOL) |               |        |     | p value |     |        |
|-----------------------------------------------------|-------|---------|--------------------------------------------|-------------------|---------------|-------------|---------|-----------------------------------------|---------------|--------|-----|---------|-----|--------|
|                                                     | N     | (%)     | No<br>n (%)                                | Moderate<br>n (%) | High<br>n (%) | No<br>n (%) |         | Moderate<br>n (%)                       | High<br>n (%) |        |     |         |     |        |
| <b>PARENT CHARACTERISTICS</b>                       |       |         |                                            |                   |               |             |         |                                         |               |        |     |         |     |        |
| <b>How many children do you have</b>                |       |         |                                            |                   |               |             | 0.35    |                                         |               |        |     | 0.24    |     |        |
| 1                                                   | 251   | (100.0) | 80                                         | (31.9)            | 67            | (26.7)      | 104     | (41.4)                                  | 126           | (50.2) | 89  | (35.5)  | 36  | (14.3) |
| 2                                                   | 649   | (100.0) | 222                                        | (34.2)            | 184           | (28.4)      | 243     | (37.4)                                  | 351           | (54.7) | 222 | (34.6)  | 69  | (10.7) |
| 3                                                   | 244   | (100.0) | 86                                         | (35.2)            | 70            | (28.7)      | 88      | (36.1)                                  | 130           | (54.2) | 73  | (30.4)  | 37  | (15.4) |
| 4                                                   | 50    | (100.0) | 14                                         | (28.0)            | 11            | (22.0)      | 25      | (50.0)                                  | 23            | (46.9) | 18  | (36.7)  | 8   | (16.3) |
| 5+                                                  | 18    | (100.0) | 5                                          | (27.8)            | 2             | (11.1)      | 11      | (61.1)                                  | 7             | (38.9) | 6   | (33.3)  | 5   | (27.8) |
| <b>Does partner work?</b>                           |       |         |                                            |                   |               |             | 0.09    |                                         |               |        |     |         |     | <0.001 |
| Yes                                                 | 995   | (100.0) | 348                                        | (35.0)            | 284           | (28.5)      | 363     | (36.5)                                  | 560           | (56.9) | 318 | (32.3)  | 107 | (10.9) |
| No                                                  | 146   | (100.0) | 43                                         | (29.5)            | 36            | (24.7)      | 67      | (45.9)                                  | 56            | (38.9) | 56  | (38.9)  | 32  | (22.2) |
| <b>Key worker</b>                                   |       |         |                                            |                   |               |             | 0.07    |                                         |               |        |     |         |     | 0.03   |
| Yes                                                 | 213   | (100.0) | 77                                         | (36.2)            | 65            | (30.5)      | 71      | (33.3)                                  | 121           | (57.6) | 69  | (32.9)  | 20  | (9.5)  |
| No                                                  | 394   | (100.0) | 125                                        | (31.7)            | 100           | (25.4)      | 169     | (42.9)                                  | 201           | (51.1) | 124 | (31.6)  | 68  | (17.3) |
| <b>Physical activity levels before the lockdown</b> |       |         |                                            |                   |               |             | 0.08    |                                         |               |        |     |         |     | 0.02   |
| Low                                                 | 63    | (100.0) | 27                                         | (42.9)            | 13            | (20.6)      | 23      | (36.5)                                  | 41            | (66.1) | 14  | (22.6)  | 7   | (11.3) |
| Medium                                              | 626   | (100.0) | 215                                        | (34.4)            | 186           | (29.7)      | 225     | (35.9)                                  | 347           | (56.2) | 196 | (31.7)  | 75  | (12.1) |
| High                                                | 505   | (100.0) | 161                                        | (31.9)            | 129           | 25.5)       | 215     | (42.6)                                  | 241           | (48.0) | 192 | (38.3)  | 69  | (13.8) |
| <b>Videocall reduces SI</b>                         |       |         |                                            |                   |               |             | <0.001  |                                         |               |        |     |         |     | 0.02   |
| Yes                                                 | 825   | (100.0) | 245                                        | (29.7)            | 238           | (28.9)      | 342     | (41.5)                                  | 411           | (50.2) | 296 | (36.2)  | 111 | (13.6) |
| No                                                  | 375   | (100.0) | 159                                        | (42.4)            | 91            | (24.3)      | 125     | (33.3)                                  | 219           | (59.0) | 110 | (29.7)  | 42  | (11.3) |
| <b>Videocall reduces loneliness</b>                 |       |         |                                            |                   |               |             | <0.001  |                                         |               |        |     |         |     | <0.001 |
| Yes                                                 | 712   | (100.0) | 194                                        | (27.3)            | 204           | (28.7)      | 314     | (44.1)                                  | 339           | (48.0) | 266 | (37.6)  | 102 | (14.4) |
| No                                                  | 464   | (100.0) | 201                                        | (43.3)            | 121           | (26.1)      | 142     | 30.6)                                   | 285           | (62.0) | 128 | (27.8)  | 47  | (10.2) |
| <b>Depression due to lockdown</b>                   |       |         |                                            |                   |               |             | <0.001  |                                         |               |        |     |         |     | <0.001 |
| Yes                                                 | 523   | (100.0) | 82                                         | (15.7)            | 124           | (23.7)      | 317     | (60.6)                                  | 151           | (29.0) | 236 | (45.3)  | 134 | (25.7) |

|                                               | Total |         | UCL three-item loneliness scale (UCLATILS) |        |          |        |      |        | ONS Direct measure of loneliness (DMOL) |     |          |     |        |     |        |         |
|-----------------------------------------------|-------|---------|--------------------------------------------|--------|----------|--------|------|--------|-----------------------------------------|-----|----------|-----|--------|-----|--------|---------|
|                                               | N     | (%)     | No                                         |        | Moderate |        | High |        | No                                      |     | Moderate |     | High   |     |        |         |
|                                               |       |         | n                                          | (%)    | n        | (%)    | n    | (%)    | p-value                                 | n   | (%)      | n   | (%)    | n   | (%)    | p value |
| No                                            | 672   | (100.0) | 316                                        | (47.0) | 207      | (30.8) | 149  | (22.2) |                                         | 477 | (72.1)   | 166 | (25.1) | 19  | (2.9)  |         |
| <b>Cancellation of the exams</b>              |       |         |                                            |        |          |        |      |        | 0.77                                    |     |          |     |        |     |        | 0.04    |
| Unhappy                                       | 276   | (100.0) | 89                                         | (32.3) | 77       | (27.9) | 110  | (39.9) |                                         | 126 | (45.8)   | 104 | (37.8) | 45  | (16.4) |         |
| Neutral                                       | 793   | (100.0) | 267                                        | (33.7) | 215      | (27.1) | 311  | (39.2) |                                         | 429 | (54.8)   | 260 | (33.2) | 94  | (12.0) |         |
| Happy                                         | 130   | (100.0) | 49                                         | (37.7) | 37       | (28.5) | 44   | (33.9) |                                         | 76  | (58.9)   | 41  | (31.8) | 12  | (9.3)  |         |
| <b>Preference of online exams</b>             |       |         |                                            |        |          |        |      |        | 0.38                                    |     |          |     |        |     |        | 0.86    |
| Yes                                           | 494   | (100.0) | 158                                        | (32.0) | 140      | (28.3) | 196  | (39.7) |                                         | 261 | (53.3)   | 164 | (33.5) | 65  | (13.3) |         |
| No                                            | 644   | (100.0) | 231                                        | (35.9) | 176      | (27.3) | 237  | (36.8) |                                         | 347 | (54.6)   | 211 | (33.2) | 78  | (12.3) |         |
| <b>Sending child to school after lockdown</b> |       |         |                                            |        |          |        |      |        | 0.20                                    |     |          |     |        |     |        | 0.09    |
| Very unhappy                                  | 100   | (100.0) | 39                                         | (39.0) | 23       | (23.0) | 38   | (38.0) |                                         | 54  | (55.7)   | 28  | (28.9) | 15  | (15.5) |         |
| Unhappy                                       | 158   | (100.0) | 59                                         | (37.3) | 48       | (30.4) | 51   | (32.3) |                                         | 89  | (58.2)   | 48  | (31.4) | 16  | (10.5) |         |
| Neither unhappy nor happy                     | 230   | (100.0) | 86                                         | (37.4) | 64       | (27.8) | 80   | (34.8) |                                         | 130 | (57.0)   | 69  | (30.3) | 29  | (12.7) |         |
| Happy                                         | 363   | (100.0) | 108                                        | (29.8) | 95       | (26.2) | 160  | (44.1) |                                         | 170 | (46.8)   | 149 | (41.0) | 44  | (12.1) |         |
| Very happy                                    | 353   | (100.0) | 115                                        | (32.6) | 101      | (28.6) | 137  | (38.8) |                                         | 193 | (54.8)   | 111 | (31.5) | 48  | (13.6) |         |
| <b>CHILD CHARACTERISTICS</b>                  |       |         |                                            |        |          |        |      |        |                                         |     |          |     |        |     |        |         |
| <b>Type of school</b>                         |       |         |                                            |        |          |        |      |        | 0.38                                    |     |          |     |        |     |        | 0.07    |
| State school                                  | 1082  | (100.0) | 356                                        | (32.9) | 302      | (27.9) | 424  | (39.2) |                                         | 559 | (52.2)   | 366 | (34.2) | 146 | (13.6) |         |
| Private school                                | 128   | (100.0) | 50                                         | (39.1) | 32       | (25.0) | 46   | (35.9) |                                         | 77  | (60.6)   | 41  | (32.3) | 9   | (7.1)  |         |
| <b>Private tuition</b>                        |       |         |                                            |        |          |        |      |        | 0.94                                    |     |          |     |        |     |        | 0.08    |
| Yes                                           | 115   | (100.0) | 40                                         | (34.8) | 32       | (27.8) | 43   | (37.4) |                                         | 70  | (60.9)   | 37  | (32.2) | 8   | (7.0)  |         |
| No                                            | 1095  | (100.0) | 366                                        | (33.4) | 302      | (27.6) | 427  | (39.0) |                                         | 566 | (52.3)   | 371 | (34.3) | 146 | (13.5) |         |
| <b>Time spent studying</b>                    |       |         |                                            |        |          |        |      |        | 0.04                                    |     |          |     |        |     |        | <0.001  |
| ≤2 hours                                      | 439   | (100.0) | 130                                        | (29.6) | 112      | (25.5) | 197  | (44.9) |                                         | 195 | (44.8)   | 157 | (36.1) | 83  | (19.1) |         |
| 2-4 hours                                     | 365   | (100.0) | 124                                        | (34.0) | 109      | (29.9) | 132  | (36.2) |                                         | 202 | (55.8)   | 119 | (32.9) | 41  | (11.3) |         |
| ≥4 hours                                      | 386   | (100.0) | 146                                        | (37.8) | 108      | (28.0) | 132  | (34.2) |                                         | 231 | (60.5)   | 124 | (32.5) | 27  | (7.1)  |         |
| <b>Boredom</b>                                |       |         |                                            |        |          |        |      |        | <0.001                                  |     |          |     |        |     |        | <0.001  |

|                                                                  | Total |         | UCL three-item loneliness scale (UCLATILS) |        |          |        |      |        | ONS Direct measure of loneliness (DMOL) |     |          |     |        |     |        |         |
|------------------------------------------------------------------|-------|---------|--------------------------------------------|--------|----------|--------|------|--------|-----------------------------------------|-----|----------|-----|--------|-----|--------|---------|
|                                                                  | N     | (%)     | No                                         |        | Moderate |        | High |        | No                                      |     | Moderate |     | High   |     |        |         |
|                                                                  |       |         | n                                          | (%)    | n        | (%)    | n    | (%)    | p-value                                 | n   | (%)      | n   | (%)    | n   | (%)    | p value |
| Low                                                              | 74    | (100.0) | 40                                         | (54.1) | 16       | (21.6) | 18   | (24.3) |                                         | 50  | (68.5)   | 18  | (24.7) | 5   | (6.8)  |         |
| Medium                                                           | 396   | (100.0) | 165                                        | (41.7) | 117      | (29.5) | 114  | (28.8) |                                         | 250 | (63.5)   | 116 | (29.4) | 28  | (7.1)  |         |
| High                                                             | 734   | (100.0) | 200                                        | (27.2) | 199      | (27.1) | 335  | (45.6) |                                         | 334 | (45.9)   | 273 | (37.6) | 120 | (16.5) |         |
| <b>Stress</b>                                                    |       |         |                                            |        |          |        |      |        | <0.001                                  |     |          |     |        |     |        | <0.001  |
| Low                                                              | 213   | (100.0) | 115                                        | (54.0) | 54       | (25.4) | 44   | (20.7) |                                         | 159 | (75.7)   | 41  | (19.5) | 10  | (4.8)  |         |
| Medium                                                           | 531   | (100.0) | 190                                        | (35.8) | 158      | (29.8) | 183  | (34.5) |                                         | 308 | (58.6)   | 177 | (33.7) | 41  | (7.8)  |         |
| High                                                             | 457   | (100.0) | 98                                         | (21.4) | 120      | (26.3) | 239  | (52.3) |                                         | 166 | (36.4)   | 188 | (41.2) | 102 | (22.4) |         |
| <b>Signs of depression</b>                                       |       |         |                                            |        |          |        |      |        | <0.001                                  |     |          |     |        |     |        | <0.001  |
| Yes                                                              | 146   | (100.0) | 30                                         | (20.5) | 35       | (24.0) | 81   | (55.5) |                                         | 54  | (37.0)   | 59  | (40.4) | 33  | (22.6) |         |
| No                                                               | 297   | (100.0) | 128                                        | (43.1) | 85       | (28.6) | 84   | (28.3) |                                         | 194 | (65.8)   | 87  | (29.5) | 14  | (4.7)  |         |
| <b>Children complaining of feeling social isolated or lonely</b> |       |         |                                            |        |          |        |      |        | <0.001                                  |     |          |     |        |     |        | <0.001  |
| Yes                                                              | 521   | (100.0) | 85                                         | (16.3) | 137      | (26.3) | 299  | (57.4) |                                         | 170 | (32.8)   | 231 | (44.6) | 117 | (22.6) |         |
| No                                                               | 685   | (100.0) | 321                                        | (46.9) | 196      | (28.6) | 168  | (24.5) |                                         | 466 | (68.9)   | 175 | (25.9) | 35  | (5.2)  |         |
| <b>Physical activity levels before the lockdown</b>              |       |         |                                            |        |          |        |      |        | 0.27                                    |     |          |     |        |     |        | 0.30    |
| Low                                                              | 17    | (100.0) | 3                                          | (17.6) | 6        | (35.3) | 8    | (47.1) |                                         | 10  | (62.5)   | 3   | (18.8) | 3   | (18.8) |         |
| Medium                                                           | 281   | (100.0) | 108                                        | (38.4) | 77       | (27.4) | 96   | (34.2) |                                         | 159 | (57.0)   | 86  | (30.8) | 34  | (12.2) |         |
| High                                                             | 901   | (100.0) | 290                                        | (32.2) | 247      | (27.4) | 364  | (40.4) |                                         | 462 | (51.7)   | 317 | (35.5) | 115 | (12.9) |         |
| <b>Physical activity levels during the lockdown</b>              |       |         |                                            |        |          |        |      |        | 0.44                                    |     |          |     |        |     |        | 0.62    |
| Low                                                              | 174   | (100.0) | 56                                         | (32.2) | 41       | (23.6) | 77   | (44.3) |                                         | 83  | (48.3)   | 66  | (38.4) | 23  | (13.4) |         |
| Medium                                                           | 715   | (100.0) | 231                                        | (32.3) | 203      | (28.4) | 281  | (39.3) |                                         | 376 | (53.0)   | 246 | (34.6) | 88  | (12.4) |         |
| High                                                             | 304   | (100.0) | 111                                        | (36.5) | 85       | (28.0) | 108  | (35.5) |                                         | 168 | (55.8)   | 92  | (30.6) | 41  | (13.6) |         |
| <b>Readiness to undertake exams</b>                              |       |         |                                            |        |          |        |      |        | <0.001                                  |     |          |     |        |     |        | <0.001  |
| Ready                                                            | 217   | (100.0) | 83                                         | (38.2) | 51       | (23.5) | 83   | (38.2) |                                         | 285 | (46.2)   | 233 | (37.8) | 99  | (16.0) |         |
| Neutral                                                          | 279   | (100.0) | 123                                        | (44.1) | 71       | (25.4) | 85   | (30.5) |                                         | 184 | (66.2)   | 77  | (27.7) | 17  | (6.1)  |         |
| Unready                                                          | 627   | (100.0) | 178                                        | (28.4) | 186      | (29.7) | 263  | (41.9) |                                         | 126 | (58.3)   | 65  | (30.1) | 25  | (11.6) |         |
